# Supplementary material
Source: publisher figshare collection journal article supplement (https://acs.figshare.com/ndownloader/files/3772867)

## SUPPORTING INFORMATION

### **Exploiting The Electrophilic and Nucleophilic Dual Role Of Nitrile imines: One-pot Three-component Synthesis Of Furo[2,3-*d*]pyridazin-4(5*H*)-ones**

Mariateresa Giustiniano,<sup>a\*</sup> Valentina Mercalli,<sup>b</sup> Jussara Amato,<sup>a</sup> Ettore Novellino,<sup>a</sup> and Gian Cesare Tron<sup>b\*</sup>

*a) Dipartimento di Farmacia, Università degli Studi di Napoli “Federico II”, via D. Montesano 49, 80131 Napoli, Italy.*

*b) Dipartimento di Scienze del Farmaco, Università del Piemonte Orientale “A. Avogadro”, Largo Donegani 2, 28100 Novara, Italy.*

**Contents:**

|                                                           |     |
|-----------------------------------------------------------|-----|
| - Experimental procedures and spectral data.....          | S3  |
| - Copies of $^1\text{H}$ and $^{13}\text{C}$ spectra..... | S11 |

**General Methods.** Commercially available reagents and solvents were used without further purification. Dichloromethane was dried by distillation from P<sub>2</sub>O<sub>5</sub> and stored over activated molecular sieves (4 Å). When necessary the reactions were performed in oven-dried glassware under a positive pressure of dry nitrogen. Melting points were determined in open glass capillaries and are uncorrected. All the compounds were characterized by IR. <sup>1</sup>H and <sup>13</sup>C APT NMR were recorded on a 400 MHz. High-resolution ESI-MS spectra were performed on a Thermo LTQ Orbitrap XL mass spectrometer. The spectra were recorded by infusion into the ESI source using MeOH as the solvent. Chemical shifts (δ) are reported in part per million (ppm) relative to the residual solvent peak. Column chromatography was performed on silica gel (70-230 mesh ASTM) using the reported eluents. Thin layer chromatography (TLC) was carried out on 5 x 20 cm plates with a layer thickness of 0.25 mm (Silica gel 60 F254). When necessary they were developed with KMnO<sub>4</sub>.

**General preparation of isocyanoacetamides (5, 20-23).**<sup>[1]</sup> The α-methyl-α-isocyanoacetamides were readily synthesized in two steps starting from the commercially available methylisocyanoacetate:

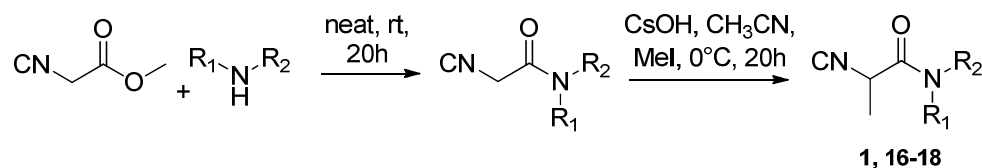

**2-isocyano-1-morpholinopropan-1-one (5).**

Compound **1** characterization data were compared to literature reported ones.<sup>[1]</sup>

**2-isocyano-1-(pyrrolidin-1-yl)propan-1-one (20).**

Compound **16** characterization data were compared to literature reported ones.<sup>[1]</sup>

**2-isocyano-N-methyl-N-(prop-2-yn-1-yl)propanamide (21).**

Compound **17** characterization data were compared to literature reported ones.<sup>[2]</sup>

**N,N-diethyl-2-isocyanopropanamide (23).**

Compound **23** characterization data were compared to literature reported ones.<sup>[3]</sup>

**2-isocyano-1-(4-methylpiperazin-1-yl)propan-1-one (22).** The crude material was purified by column chromatography (dichloromethane/methanol 95:5) to give the product as a colorless oil (46% yield). <sup>1</sup>H NMR (400 MHz, CDCl<sub>3</sub>) δ 4.45 (br q, 1H), 3.62-3.34 (m, 4H), 2.35-2.29 (m, 4H), 2.20 (s, 3H), 1.46 (d, *J* = 6.68 Hz, 3H); <sup>13</sup>C NMR (100 MHz, CDCl<sub>3</sub>) δ 163.9, 158.6, 54.5, 54.3, 49.5, 45.8, 45.6, 42.4, 18.7. IR (KBr) 2939, 2148, 1665, 1451, 1289, 1144, 998 *v*<sub>max</sub>/cm<sup>-1</sup>. MS (ESI) *m/z* Calcd for C<sub>9</sub>H<sub>15</sub>N<sub>3</sub>O: 181.1215; Found: 182.1290 [M+H]<sup>+</sup>.

**General preparation of hydrazoneyl chlorides (6, 13-18).**<sup>[4]</sup> The hydrazoneyl chlorides were readily synthesized in two steps:

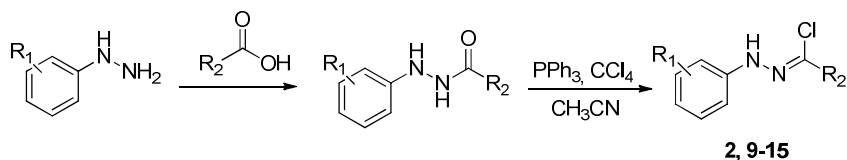

**Preparation of acylhydrazines.** To a stirred solution of acid on a 5 mmol scale in THF (0.2 M) were added EDC HCl (5.5 mmol, 1.1 eq.), DMAP (1 mmol, 0.2 eq.), triethylamine (10 mmol, 2 eq.) and hydrazine (5 mmol, 1 eq.) at 0°C. The resulting mixture was allowed to warm to room temperature over 24 h. The crude reaction mixture was washed with HCl 1M sol. (x2), NaHCO<sub>3</sub> sat. sol. (x2) and brine (x1), evaporated to dryness and used in the next step without further purification.

**Preparation of hydrazoneyl chlorides (6, 13-19).** The corresponding acylhydrazine (2.5 mmol) was dissolved in CH<sub>3</sub>CN (0.5 M) and triphenylphosphine (3 mmol, 1.2 eq.) and carbon tetrachloride (3 mmol, 1.2 eq.) were added. The reaction was stirred at room temperature until all the acylhydrazine was consumed as judged by TLC (typically 8-12 hours). The reaction was concentrated under reduced pressure and purified by column chromatography (*n*-hexane/EtOAc 30:1) and stored below 0°C. Due to their delicate nature, neither HMRS nor elemental analyses of nitrile imines gave satisfactory results.

**(Z)-4-methyl-*N'*-phenylbenzohydrazonoyl chloride (6).**

Compound **2** characterization data were compared to literature reported ones.<sup>[4]</sup>

**(Z)-*N'*-phenylbenzohydrazonoyl chloride (13).**

Compound **9** characterization data were compared to literature reported ones.<sup>[5]</sup>

**(Z)-4-iodo-*N'*-phenylbenzohydrazonoyl chloride (14).**

Compound **10** characterization data were compared to literature reported ones.<sup>[4]</sup>

**(Z)-4-phenoxy-*N'*-phenylbenzohydrazonoyl chloride (15).** The crude material was purified by column chromatography (*n*-hexane/ EtOAc 30:1) to give the product as an amorphous yellowish solid (59% yield). <sup>1</sup>H NMR (400 MHz, CDCl<sub>3</sub>) δ 8.07 (br s, *NH*), 7.98 (d, *J* = 8.72 Hz, 2H), 7.48-7.39 (m, 4H), 7.27-7.23 (m, 3H), 7.18 (br d, AA'XX', 2H), 7.12 (br d, AA'XX', 2H), 7.04 (br t, 1H); <sup>13</sup>C NMR (100 MHz, CDCl<sub>3</sub>) δ 158.6, 156.6, 143.5, 130.1 (2C), 129.5 (2C), 129.4 (2C), 128.1, 124.3, 124.0, 121.2, 119.5 (2C), 118.4 (2C), 113.5 (2C).

**(Z)-2-(naphthalen-2-yl)-*N'*-phenylacetohydrazonoyl chloride (16).** The crude material was purified by column chromatography (*n*-hexane/ EtOAc 30:1) to give the product as a pink oil (59% yield). <sup>1</sup>H NMR (400 MHz, CDCl<sub>3</sub>) δ 8.26 (d, *J* = 8.28, 1H), 7.91 (d, *J* = 7.88, 1H), 7.86-7.84 (m, 1H), 7.70 (br s, *NH*), 7.59-7.47 (m, 4H), 7.33-7.29 (m, 2H), 7.09-7.07 (m, 2H), 6.96-6.93 (m, 1H), 4.42 (s, 2H). <sup>13</sup>C NMR (100 MHz, CDCl<sub>3</sub>) δ 143.8, 134.0, 132.3, 131.7, 129.5 (2C), 128.9, 128.4, 128.2, 126.5, 126.0, 125.9, 125.6, 124.0, 120.9, 113.3 (2C), 42.6.

**(Z)-*N'*-(4-chlorophenyl)benzohydrazonoyl chloride (17).**

Compound **13** characterization data were compared to literature reported ones.<sup>[4]</sup>

**(Z)-*N*-(3-methoxyphenyl)benzohydrazonoyl chloride (18).**

The crude material was purified by column chromatography (PE/EtOAc 95:5) to give the product as a brown solid (55% yield). <sup>1</sup>H-NMR (300 MHz, CDCl<sub>3</sub>) δ 8.07 (br s, *NH*), 7.75 (br d, 2H), 7.45-7.39 (m, 3H), 7.24 (br t, 1H), 6.85 (br s, 1H), 6.75 (dd, *J* = 7.95, 1.86 Hz, 1H), 6.54 (dd, *J* = 8.11, 2.46 Hz, 1H), 3.84 (s, 3H); <sup>13</sup>C-NMR (75 MHz, CDCl<sub>3</sub>) δ 160.9, 144.8, 134.5, 130.3, 129.3, 128.5 (2C), 126.5 (2C), 124.8, 106.6, 106.2, 99.6, 55.3.

**(Z)-4-chloro-N-(3-methoxyphenyl)benzohydrazonoyl chloride (19).**

The crude material was purified by column chromatography (PE/EtOAc 95:5) to give the product as a brown solid (47% yield). <sup>1</sup>H-NMR (300 MHz, CDCl<sub>3</sub>+CD<sub>3</sub>OD) δ 7.79 (d, AA'XX, *J* = 8.25 Hz, 2H), 7.33 (d, AA'XX, *J* = 8.25 Hz, 2H), 7.19-7.15 (m, 1H), 6.75 (br s, 1H), 6.69 (dd, *J* = 7.95, 1.86 Hz, 1H), 6.47 (dd, *J* = 8.11, 2.46 Hz, 1H), 3.82 (s, 3H); <sup>13</sup>C-NMR (75 MHz, CDCl<sub>3</sub>+CD<sub>3</sub>OD) δ 160.8, 144.4, 135.1, 132.9, 130.1, 128.6, 127.5, 123.5, 106.6, 106.2, 99.6, 55.3.

**Synthesis of 4-(4-methyl-2-((2-phenylhydrazono)(*p*-tolyl)methyl)oxazol-5-yl)morpholine (7).**

The hydrazonoyl chloride (0.8 mmol, 1 eq.), the isocyanoacetamide (0.8 mmol, 1 eq.) and TEA (0.8 mmol, 1 eq.) were one-pot mixed in DCM (0.8 M, 1 mL) and stirred at room temperature under a nitrogen atmosphere overnight. After evaporation of the solvent, the crude material was purified by column chromatograph (*n*-hexane/ EtOAc 8:2) to give the product as yellow solid (226 mg, 75% yield). Data are referred to the main isomer. <sup>1</sup>H NMR (400 MHz, CDCl<sub>3</sub>) δ 12.77 (br s, *NH*), 7.68 (br d, AA'XX', 2H), 7.31-7.22 (m, 7H), 3.81-3.79 (m, 4H), 3.12-3.10 (m, 4H), 2.40 (s, 3H), 2.26 (s, 3H); <sup>13</sup>C NMR (100 MHz, CDCl<sub>3</sub>) δ 170.3, 163.4, 143.8, 138.4, 133.4, 130.8, 129.6 (2C), 129.2 (2C), 128.4 (2C), 126.0, 121.4, 113.6 (2C), 66.7, 66.5, 45.9, 42.5, 21.3, 18.8. IR (KBr) 3219, 2945, 2846, 1947, 1909, 1665, 1596, 1495, 1251  $\nu_{\max}/\text{cm}^{-1}$ ; Mp 137-138°C; MS (ESI) *m/z* Calcd for C<sub>22</sub>H<sub>24</sub>N<sub>4</sub>O<sub>2</sub>: 376.1899; Found: 377.1963 [M+H]<sup>+</sup>.

**General one-pot preparation of furo[2,3-*d*]pyridazin-4(5*H*)-ones (8, 24-34).** The hydrazonoyl chloride (0.8 mmol, 1 eq.), the isocyanoacetamide (0.8 mmol, 1 eq.) and TEA (0.8 mmol, 1 eq.) were one-pot mixed in DCM (0.8 M, 1 mL) and stirred at room temperature under a nitrogen atmosphere overnight. The formation of the intermediate oxazole was monitored by TLC, and after evaporation of the solvent, toluene (0.2M, 4 ml) and DMAD (dimethyl acetylenedicarboxylate) (1.6 mmol, 2 equiv.) were added to the crude mixture and the reaction was stirred at reflux temperature overnight. After evaporation of the solvent, the crude material was purified by column chromatography.

**Methyl 2-morpholino-4-oxo-5-phenyl-7-(*p*-tolyl)-4,5-dihydrofuro[2,3-*d*]pyridazine-3-carboxylate (8).** The crude material was purified by column chromatography (*n*-hexane/ EtOAc 7:3) to give the product as yellow solid (160 mg, 45% yield). <sup>1</sup>H NMR (400 MHz, CDCl<sub>3</sub>) δ 7.85 (br d, AA'XX',

2H), 7.61 (br d, AA'XX', 2H), 7.50-7.46 (m, 2H), 7.40-7.36 (m, 1H), 7.29 (br d, 2H), 3.91 (s, 3H), 3.89-3.87 (m, 4H), 3.67-3.64 (m, 4H), 2.41 (s, 3H);  $^{13}\text{C}$  NMR (100 MHz,  $\text{CDCl}_3$ )  $\delta$  163.8, 161.5, 156.8, 143.6, 142.3, 139.9, 134.8, 129.5 (2C), 129.4, 128.7 (2C), 127.9, 127.4 (2C), 126.4 (2C), 123.5, 90.5, 66.3 (2C), 52.2, 48.2 (2C), 21.4. IR (KBr) 2956, 2846, 1695, 1585, 1448, 1294, 1072  $\text{v}_{\text{max}}/\text{cm}^{-1}$ ; Mp 211-212°C; MS (ESI)  $m/z$  Calcd for  $\text{C}_{25}\text{H}_{23}\text{N}_3\text{O}_5$ : 445.1638; Found: 446.1693  $[\text{M}+\text{H}]^+$ .

**methyl 5-(4-chlorophenyl)-2-(methyl(prop-2-yn-1-yl)amino)-4-oxo-7-phenyl-4,5-dihydrofuro[2,3-*d*]pyridazine-3-carboxylate (24).** The crude material was purified by column chromatography (*n*-hexane/ EtOAc 7:3) to give the product as yellow solid (118 mg, 33% yield).  $^1\text{H}$  NMR (400 MHz,  $\text{CDCl}_3$ )  $\delta$  8.01 (br d, AA'XX', 2H), 7.60 (br d, AA'XX', 2H), 7.50-7.43 (m, 5H), 4.36 (s, 2H), 3.93 (s, 3H), 3.27 (s, 3H), 2.37 (s, 1H);  $^{13}\text{C}$  NMR (100 MHz,  $\text{CDCl}_3$ )  $\delta$  163.6, 160.9, 156.6, 143.5, 140.8, 134.9, 133.6, 132.1, 129.7, 128.7 (4C), 127.6 (2C), 127.5 (2C), 123.8, 90.6, 77.5, 73.6, 52.2, 42.3, 38.1. IR (KBr) 3214, 2945, 1673, 1591, 1489, 1286, 1067  $\text{v}_{\text{max}}/\text{cm}^{-1}$ ; Mp 86-87°C; MS (ESI)  $m/z$  Calcd for  $\text{C}_{24}\text{H}_{18}\text{ClN}_3\text{O}_4$ : 447.0986; Found: 448.1036  $[\text{M}+\text{H}]^+$ .

**methyl 7-(4-iodophenyl)-2-(4-methylpiperazin-1-yl)-4-oxo-5-phenyl-4,5-dihydrofuro[2,3-*d*]pyridazine-3-carboxylate (25).** The crude material was purified by column chromatography (dichloromethane/methanol 95:5) to give the product as yellow solid (141 mg, 31% yield).  $^1\text{H}$  NMR (400 MHz,  $\text{CDCl}_3$ )  $\delta$  7.83 (br d, AA'XX', 2H), 7.71 (br d, AA'XX', 2H), 7.59 (br d, 2H), 7.50-7.46 (m, 2H), 7.41-7.37 (m, 1H), 3.90 (s, 3H), 3.72-3.69 (m, 4H), 2.66-2.62 (m, 4H), 2.40 (s, 3H);  $^{13}\text{C}$  NMR (100 MHz,  $\text{CDCl}_3$ )  $\delta$  163.8, 161.5, 156.7, 143.1, 142.2, 138.0, 133.7, 131.8, 129.1, 128.8, 128.1, 126.4, 123.8, 96.0, 90.2, 54.3 (2C), 52.3, 47.9 (2C), 46.0. IR (KBr) 2939, 2802, 1681, 1575, 1451, 1275, 1072  $\text{v}_{\text{max}}/\text{cm}^{-1}$ ; Mp 236-237°C; MS (ESI)  $m/z$  Calcd for  $\text{C}_{25}\text{H}_{23}\text{IN}_4\text{O}_4$ : 570.0764; Found: 571.0777  $[\text{M}+\text{H}]^+$ .

**methyl 2-(4-methylpiperazin-1-yl)-4-oxo-7-(4-phenoxyphenyl)-5-phenyl-4,5-dihydrofuro[2,3-*d*]pyridazine-3-carboxylate (26).** The crude material was purified by column chromatography (dichloromethane/methanol 95:5) to give the product as yellow solid (167 mg, 39% yield).  $^1\text{H}$  NMR (400 MHz,  $\text{CDCl}_3$ )  $\delta$  7.94 (br d, AA'XX', 2H), 7.60 (br d, AA'XX', 2H), 7.49-7.45 (m, 2H), 7.39-7.35 (m, 3H), 7.16 (br t, 1H), 7.09-7.05 (m, 4H), 3.90 (s, 3H), 3.75-3.71 (m, 4H), 2.71-2.66 (m, 4H), 2.43 (s, 3H);  $^{13}\text{C}$  NMR (100 MHz,  $\text{CDCl}_3$ )  $\delta$  163.8, 161.3, 158.9, 156.7, 156.4, 143.4, 142.4, 134.1, 129.9 (2C), 129.0 (2C), 128.6 (2C), 127.8, 127.0, 126.3 (2C), 124.0, 123.6, 119.6 (2C), 118.5 (2C), 94.1, 54.2 (2C), 52.1, 47.8 (2C), 45.7. IR (KBr) 2945, 2796, 1681, 1585, 1486, 1237, 1155, 1067

$\nu_{\max}/\text{cm}^{-1}$ ; Mp 193-194°C; MS (ESI)  $m/z$  Calcd for  $\text{C}_{31}\text{H}_{28}\text{N}_4\text{O}_5$ : 536.2060; Found: 537.2079  $[\text{M}+\text{H}]^+$ .

**methyl 2-(4-methylpiperazin-1-yl)-7-(naphthalen-2-ylmethyl)-4-oxo-5-phenyl-4,5-dihydrofuro[2,3-*d*]pyridazine-3-carboxylate (27).** The crude material was purified by column chromatography (dichloromethane/methanol 98:2) to give the product as light yellow solid (89.5 mg, 22% yield).  $^1\text{H}$  NMR (400 MHz,  $\text{CDCl}_3$ )  $\delta$  8.31 (d,  $J = 8.04$  Hz, 1H), 7.87 (d,  $J = 8.12$  Hz, 1H), 7.78 (d,  $J = 8.12$  Hz, 1H), 7.58-7.47 (m, 7H), 7.43-7.37 (m, 2H), 4.61 (s, 2H), 3.83 (s, 3H), 3.40-3.38 (m, 4H), 2.41-2.39 (m, 4H), 2.30 (s, 3H);  $^{13}\text{C}$  NMR (100 MHz,  $\text{CDCl}_3$ )  $\delta$  163.8, 161.6, 156.9, 144.3, 142.3, 136.0, 134.0, 132.6, 132.1, 128.8 (3C), 128.0, 127.9, 127.6, 126.5 (2C), 126.3, 125.8, 125.2, 124.0, 123.3, 89.5, 54.3 (2C), 52.0, 48.0 (2C), 46.0, 35.1. IR (KBr) 2939, 2796, 1670, 1583, 1448, 1253, 1144, 1061  $\nu_{\max}/\text{cm}^{-1}$ ; Mp 202-203°C; MS (ESI)  $m/z$  Calcd for  $\text{C}_{30}\text{H}_{28}\text{N}_4\text{O}_4$ : 508.2111; Found: 509.2176  $[\text{M}+\text{H}]^+$ .

**methyl 2-(methyl(prop-2-yn-1-yl)amino)-4-oxo-5,7-diphenyl-4,5-dihydrofuro[2,3-*d*]pyridazine-3-carboxylate (28).** The crude material was purified by column chromatography (*n*-hexane/ EtOAc 7:3) to give the product as yellowish solid (106 mg, 32% yield).  $^1\text{H}$  NMR (400 MHz,  $\text{CDCl}_3$ )  $\delta$  8.03 (br d, AA' XX', 2H), 7.62 (br d, AA' XX', 2H), 7.52-7.46 (m, 5H), 7.41-7.37 (m, 1H), 4.37 (br d, 2H), 3.93 (s, 3H), 3.27 (s, 3H), 2.36 (br t, 1H);  $^{13}\text{C}$  NMR (100 MHz,  $\text{CDCl}_3$ )  $\delta$  163.7, 161.0, 156.8, 143.6, 142.3, 134.7, 132.2, 129.7, 128.8 (2C), 128.7 (2C), 127.9, 127.5 (2C), 126.4 (2C), 123.7, 90.5, 73.6, 52.4, 42.3 (2C), 38.2. IR (KBr) 3252, 1703, 1668, 1610, 1215, 1070  $\nu_{\max}/\text{cm}^{-1}$ ; Mp 146-147°C; MS (ESI)  $m/z$  Calcd for  $\text{C}_{24}\text{H}_{19}\text{N}_3\text{O}_4$ : 413.1376; Found: 414.1458  $[\text{M}+\text{H}]^+$ .

**Methyl 7-(4-chlorophenyl)-5-(3-methoxyphenyl)-4-oxo-2-(pyrrolidin-1-yl)-4,5-dihydrofuro[2,3-*d*]pyridazine-3-carboxylate (29).** The crude material was purified by column chromatography (PE/EtOAc 7:3) to give the product as yellowish solid (169 mg, 44% yield).  $^1\text{H}$ -NMR (300 MHz,  $\text{CDCl}_3$ )  $\delta$  7.95 (d, AA'XX',  $J = 8.25$  Hz, 2H), 7.43 (d, AA'XX',  $J = 8.25$  Hz, 2H), 7.40-7.45 (m, 1H), 7.18-7.13 (m, 2H), 6.93 (dd,  $J = 8.25, 2.13$  Hz, 1H), 3.89 (s, 3H), 3.83 (s, 3H), 3.67 (br t, 4H), 2.05 (br t, 4H);  $^{13}\text{C}$ -NMR (75 MHz,  $\text{CDCl}_3$ )  $\delta$  163.7, 160.0, 159.9, 156.9, 143.5, 142.6, 135.6, 133.2, 131.0, 129.5, 129.0, 128.8, 124.4, 119.0, 114.1, 112.4, 86.8, 55.6, 52.1, 49.8, 25.6; IR (KBr) 2952, 2873, 1738, 1683, 1589, 1489, 1271, 1089, 835  $\nu_{\max}/\text{cm}^{-1}$ ; Mp 162.2-163.1 °C; MS (ESI)  $m/z$  Calcd for  $\text{C}_{25}\text{H}_{22}\text{ClN}_3\text{O}_5$ : 479.1248; Found: 480.1327  $[\text{M}+\text{H}]^+$ .



**Methyl 5-(3-methoxyphenyl)-2-morpholino-4-oxo-7-phenyl-4,5-dihydrofuro[2,3-*d*]pyridazine-3-carboxylate (30).** The crude material was purified by column chromatography (PE/EtOAc 6:4) to give the product as white solid (185 mg, 50% yield). <sup>1</sup>H-NMR (300 MHz, CDCl<sub>3</sub>) δ 7.99 (br d, 2H), 7.47-7.33 (m, 4H), 7.21-7.15 (m, 2H), 6.92 (dd, *J* = 8.1, 2.1 Hz, 1H), 3.91 (s, 3H), 3.82 (s, 3H), 3.66 (br t, 4H), 2.02 (br t, 4H); <sup>13</sup>C-NMR (75 MHz, CDCl<sub>3</sub>) δ 163.8, 160.0, 159.9, 156.9, 143.6, 142.9, 134.4, 132.5, 129.5, 129.4, 128.7, 127.5, 124.2, 119.0, 114.0, 112.4, 86.7, 55.5, 52.0, 49.7, 25.5; IR (KBr) 2955, 2877, 1687, 1601, 1580, 1491, 1270, 1087, 767  $\nu_{\max}/\text{cm}^{-1}$ ; Mp 194.7-195.8 °C; MS (ESI) *m/z* Calcd for C<sub>25</sub>H<sub>23</sub>N<sub>3</sub>O<sub>6</sub>: 461.1587; Found: 462.1664 [M+H]<sup>+</sup>.

**Methyl 5-(3-methoxyphenyl)-4-oxo-7-phenyl-2-(pyrrolidin-1-yl)-4,5-dihydrofuro[2,3-*d*]pyridazine-3-carboxylate (31).** The crude material was purified by column chromatography (PE/EtOAc 6:4) to give the product as white solid (89 mg, 25% yield). <sup>1</sup>H-NMR (300 MHz, CDCl<sub>3</sub>) δ 7.96 (d, *J* = 7.6 Hz, 2H), 7.48-7.35 (m, 4H), 7.20-7.14 (m, 2H), 6.94 (br d, 1H), 3.91 (s, 3H), 3.89-3.86 (m, 4H), 3.83 (s, 3H), 3.67-3.34 (m, 4H); <sup>13</sup>C-NMR (75 MHz, CDCl<sub>3</sub>) δ 163.9, 161.6, 160.0, 156.8, 143.6, 143.5, 134.7, 132.3, 129.8, 129.6, 128.9, 127.6, 123.7, 119.0, 114.2, 112.5, 90.7, 66.4, 55.6, 52.4, 48.4; IR (KBr) 2952, 2857, 1687, 1673, 1577, 1492, 1288, 1070, 1031, 773  $\nu_{\max}/\text{cm}^{-1}$ ; Mp 184.2-184.8 °C; MS (ESI) *m/z* Calcd for C<sub>25</sub>H<sub>23</sub>N<sub>3</sub>O<sub>5</sub>: 445.1638; Found: 446.1676 [M+H]<sup>+</sup>.

**Methyl 4-oxo-5,7-diphenyl-2-(pyrrolidin-1-yl)-4,5-dihydrofuro[2,3-*d*]pyridazine-3-carboxylate (32).** The crude material was purified by column chromatography (PE/EtOAc 7:3) to give the product as white solid (103 mg, 31% yield). <sup>1</sup>H-NMR (300 MHz, CDCl<sub>3</sub>) δ 8.01 (d, *J* = 7.6 Hz, 2H), 7.62 (d, *J* = 7.6 Hz, 2H), 7.50-7.42 (m, 5H), 7.39-7.35 (m, 1H), 3.90 (s, 3H), 3.70-3.66 (m, 4H), 2.06-2.02 (m, 4H); <sup>13</sup>C-NMR (75 MHz, CDCl<sub>3</sub>) δ 163.9, 160.1, 157.2, 143.0, 142.6, 134.6, 132.6, 129.6, 128.8, 127.9, 127.6, 127.3, 126.6, 124.2, 86.8, 52.1, 49.8, 25.6; IR (KBr) 2972, 2875, 1709, 1670, 1613, 1585, 1496, 1263, 1080, 912, 773  $\nu_{\max}/\text{cm}^{-1}$ ; Mp 231.1-231.6 °C; MS (ESI) *m/z* Calcd for C<sub>24</sub>H<sub>21</sub>N<sub>3</sub>O<sub>4</sub>: 415.1532; Found: 416.1614 [M+H]<sup>+</sup>.

**Methyl 4-oxo-5-phenyl-2-(pyrrolidin-1-yl)-7-(*p*-tolyl)-4,5-dihydrofuro[2,3-*d*]pyridazine-3-carboxylate (33).** The crude material was purified by column chromatography (PE/EtOAc 7:3) to give the product as white solid (120 mg, 35% yield). <sup>1</sup>H-NMR (300 MHz, CDCl<sub>3</sub>) δ 7.88 (d, AA'XX', *J* = 8.25 Hz, 2H), 7.63 (d, AA'XX', *J* = 8.25 Hz, 2H), 7.50-7.46 (m, 2H), 7.43-7.33 (m, 1H), 7.27-7.25 (m, 2H), 3.92 (s, 3H), 3.68-3.67 (m, 4H), 2.40 (br s, 3H), 2.05-2.03 (m, 4H); <sup>13</sup>C-NMR (75 MHz, CDCl<sub>3</sub>) δ 163.8, 160.0, 157.0, 142.9, 142.6, 139.6, 134.5, 129.7, 129.4, 128.6, 127.8, 126.5, 124.1, 86.7, 52.0, 49.6, 25.5, 21.4; IR (KBr) 2968, 2862, 1680, 1565, 1442, 1078, 988

$\nu_{\max}/\text{cm}^{-1}$ ; Mp 220.2-220.9 °C; MS (ESI)  $m/z$  (M+H)<sup>+</sup> Calcd for C<sub>25</sub>H<sub>23</sub>N<sub>3</sub>O<sub>4</sub>: 429.1689; Found: 430.1735 [M+H]<sup>+</sup>.

**Methyl 2-(diethylamino)-4-oxo-5,7-diphenyl-4,5-dihydrofuro[2,3-*d*]pyridazine-3-carboxylate (34).** The crude material was purified by column chromatography (PE/EtOAc 7:3) to give the product as white solid (104 mg, 31% yield). <sup>1</sup>H-NMR (300 MHz, CDCl<sub>3</sub>)  $\delta$  8.03 (d,  $J$  = 7.8 Hz, 2H), 7.67 (d,  $J$  = 7.8 Hz, 2H), 7.53-7.39 (m, 6H), 3.96 (s, 3H), 3.65 (q,  $J$  = 7.0 Hz, 4H), 1.31 (t,  $J$  = 7.0 Hz, 6H); <sup>13</sup>C-NMR (75 MHz, CDCl<sub>3</sub>)  $\delta$  164.4, 160.3, 157.1, 142.8, 142.6, 134.6, 132.7, 129.6, 128.8, 128.0, 127.6, 126.6, 124.7, 87.9, 52.5, 45.3, 13.5; IR (KBr) 2865, 1698, 1667, 1611, 1572, 1487, 1315, 891, 801  $\nu_{\max}/\text{cm}^{-1}$ ; Mp 225.2-226.1 °C; MS (ESI)  $m/z$  (M+H)<sup>+</sup> Calcd for C<sub>24</sub>H<sub>23</sub>N<sub>3</sub>O<sub>4</sub>: 417.1689; Found: 418.1769 [M+H]<sup>+</sup>.

**Preparation of Lithium 7-(4-iodophenyl)-2-(4-methylpiperazin-1-yl)-4-oxo-5-phenyl-4,5-dihydrofuro[2,3-*d*]pyridazine-3-carboxylate (35).** The furo[2,3-*d*]pyridazin-4(5*H*)-one **25** (0.05 mmol, 1 eq.) was dissolved in THF/H<sub>2</sub>O 3:1 (0.2M), lithium hydroxide (0.05 mmol, 1 eq.) was added and the reaction mixture was stirred at 100°C overnight. The hydrolysis of the ester function was monitored by TLC (95:5 DCM/MeOH). The conversion as revealed by NMR of the crude reaction mixture was quantitative. <sup>1</sup>H-NMR (400 MHz, D<sub>2</sub>O-DMSO-*d*<sub>6</sub>)  $\delta$  7.86 (br d, AA'XX', 2H), 7.71 (br d, AA'XX', 2H), 7.52-7.37 (m, 5H), 3.51-3.48 (m, 4H), 2.43-2.39 (m, 4H), 2.16 (s, 3H); <sup>13</sup>C-NMR (100 MHz, D<sub>2</sub>O-DMSO-*d*<sub>6</sub>)  $\delta$  167.7, 166.4, 158.6, 158.4, 142.6, 141.9, 138.2 (2C), 134.1, 132.0, 129.8 (2C), 129.1 (2C), 128.4, 126.8 (2C), 124.9, 96.7, 54.2 (2C), 47.2 (2C), 45.9; IR (KBr) 2934, 2780, 1711, 1569, 1489, 1358, 1144, 998  $\nu_{\max}/\text{cm}^{-1}$ ; Mp 204-205°C; MS (ESI)  $m/z$  Calcd for C<sub>24</sub>H<sub>21</sub>IN<sub>4</sub>O<sub>4</sub>: 556.0607; Found: 557.0647 [M+H]<sup>+</sup>.

## References:

- [1] Mossetti R., Caprioglio D., Colombano G., Tron G. C., Pirali T. *Org. Biomol. Chem.* **2011**, (9), 1627-1631.
- [2] Pirali T., Tron G. C., Zhu J. *Org. Lett.* **2006**, 8 (18), 4145-4148.
- [3] Schöllkopf U., Hausberg H. H., Segal M., Reiter U., Hoppe I., Saenger W., Lindner K. *Liebigs Ann. Chem.* **1981**, (3), 439-58
- [4] Giustiniano M., Meneghetti F., Mercalli V., Varese M., Giustiniano F., Novellino E., Tron G.C. *Org. Lett.* **2014**, 16 (20), 5332-5335.

[5] Patel H. V., Vyas K. A., Pandey S.P., Fernandes P. S. *Tetrahedron* **1996**, 52 (2), 661-668.

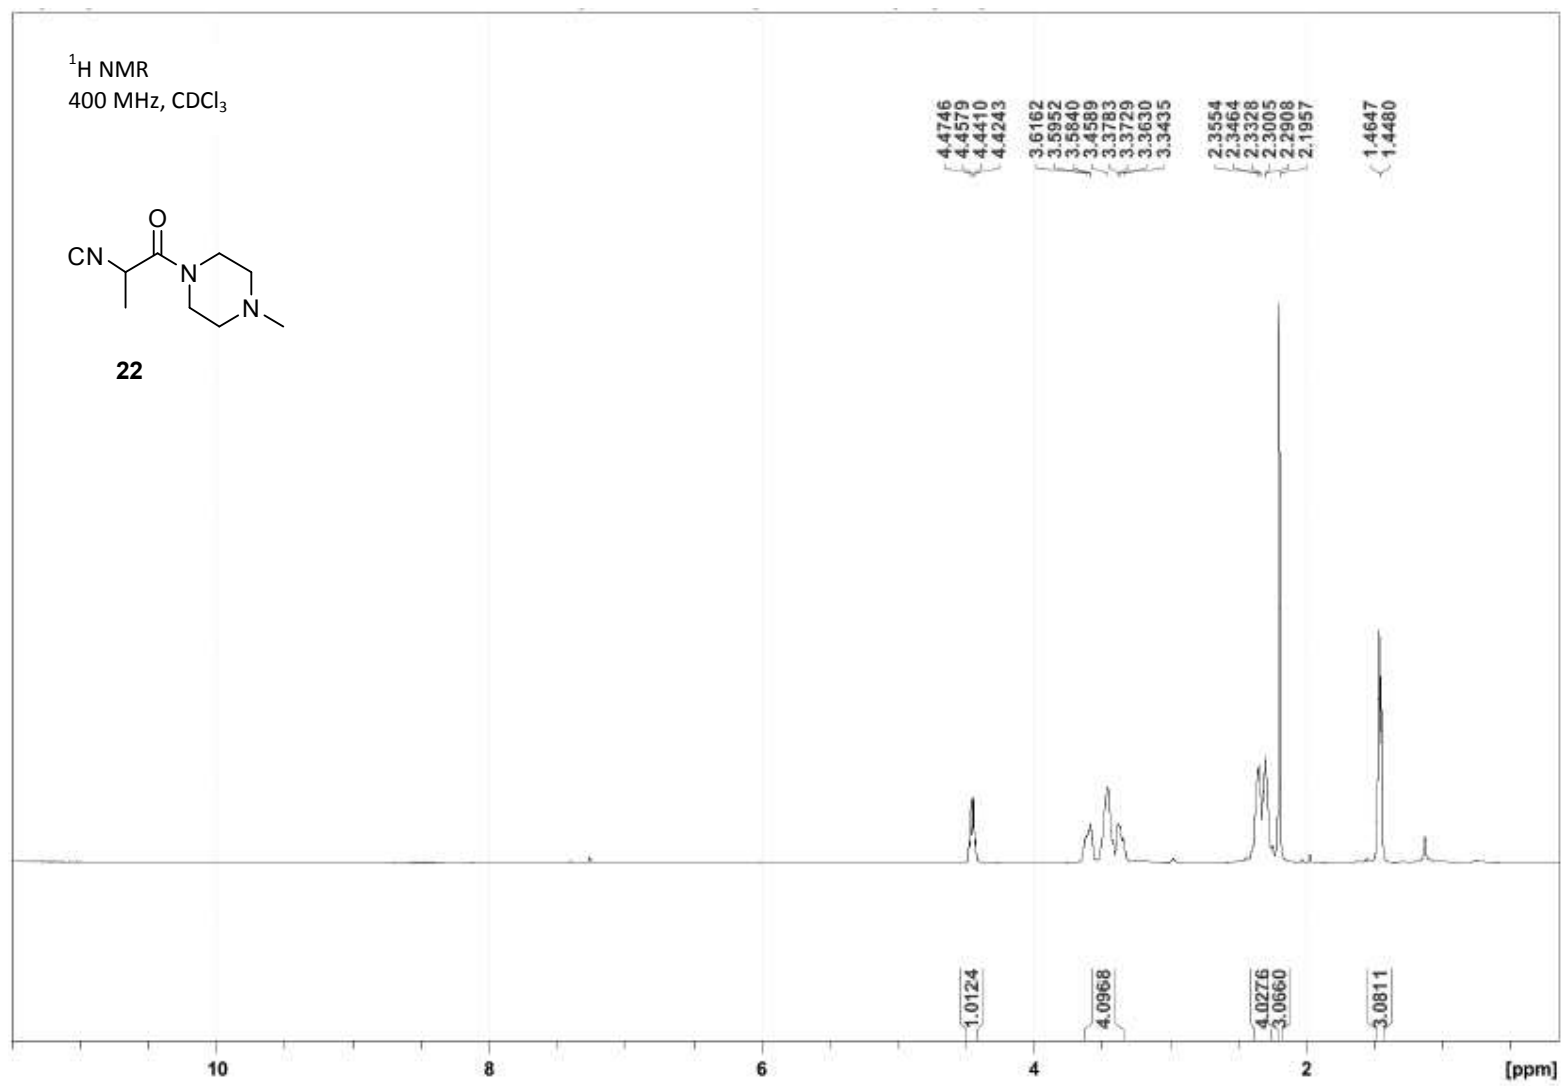

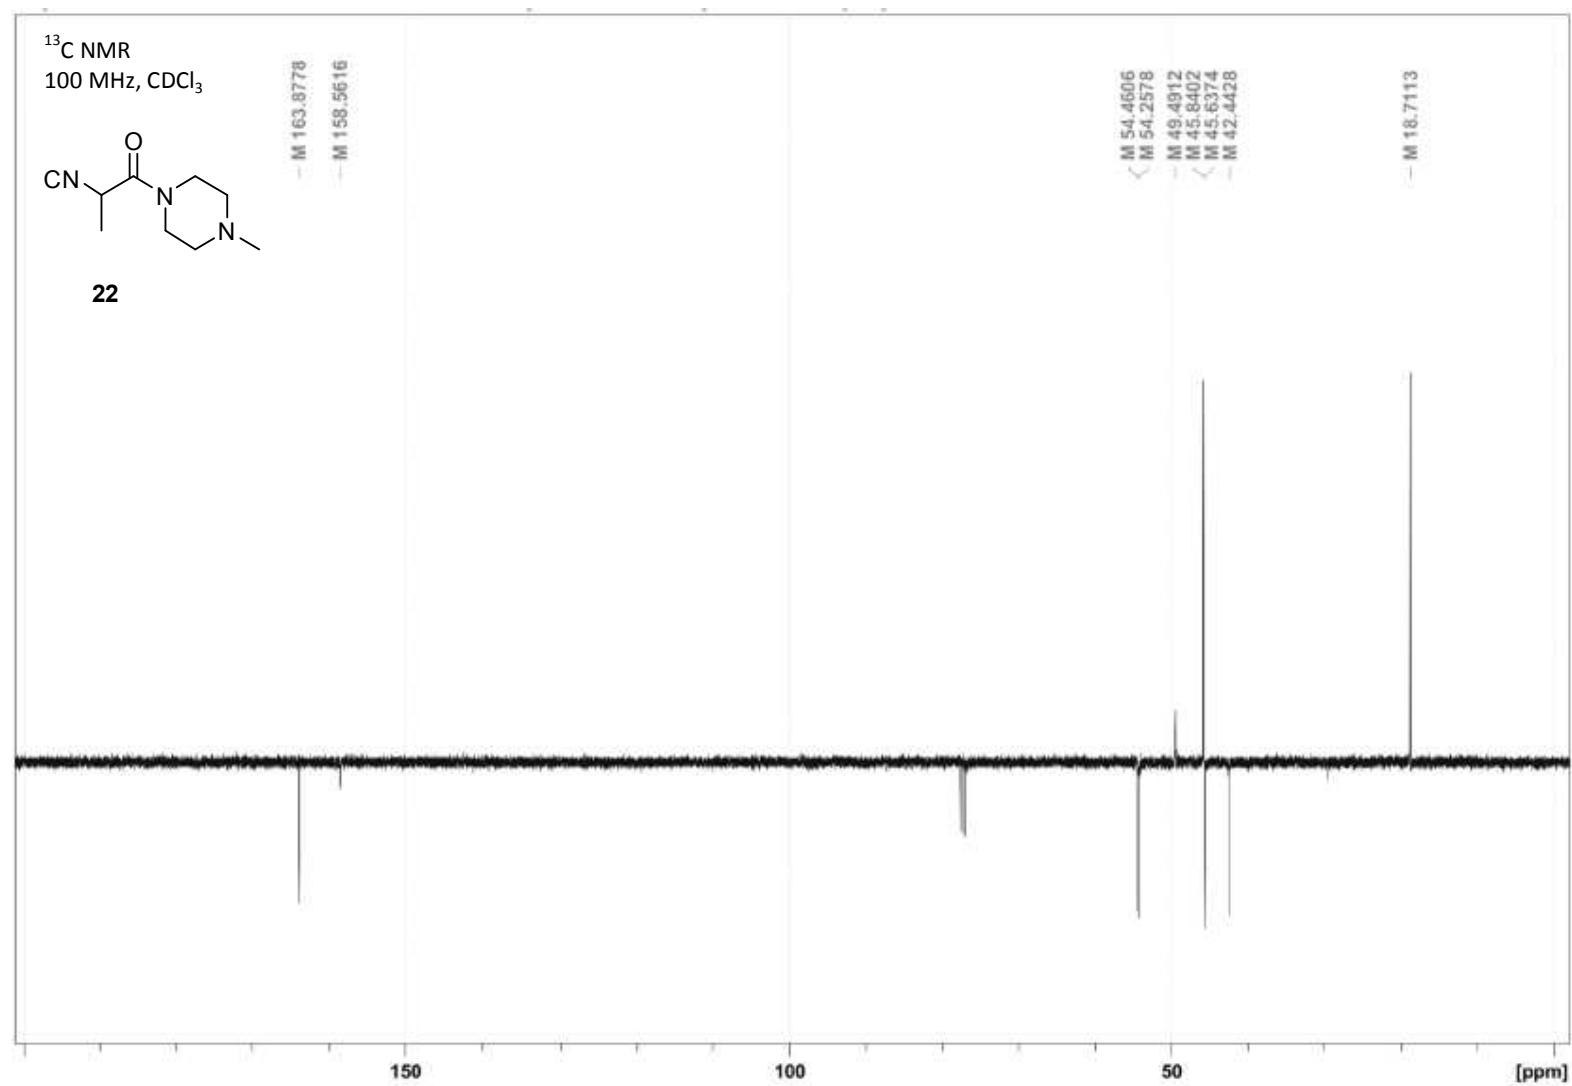

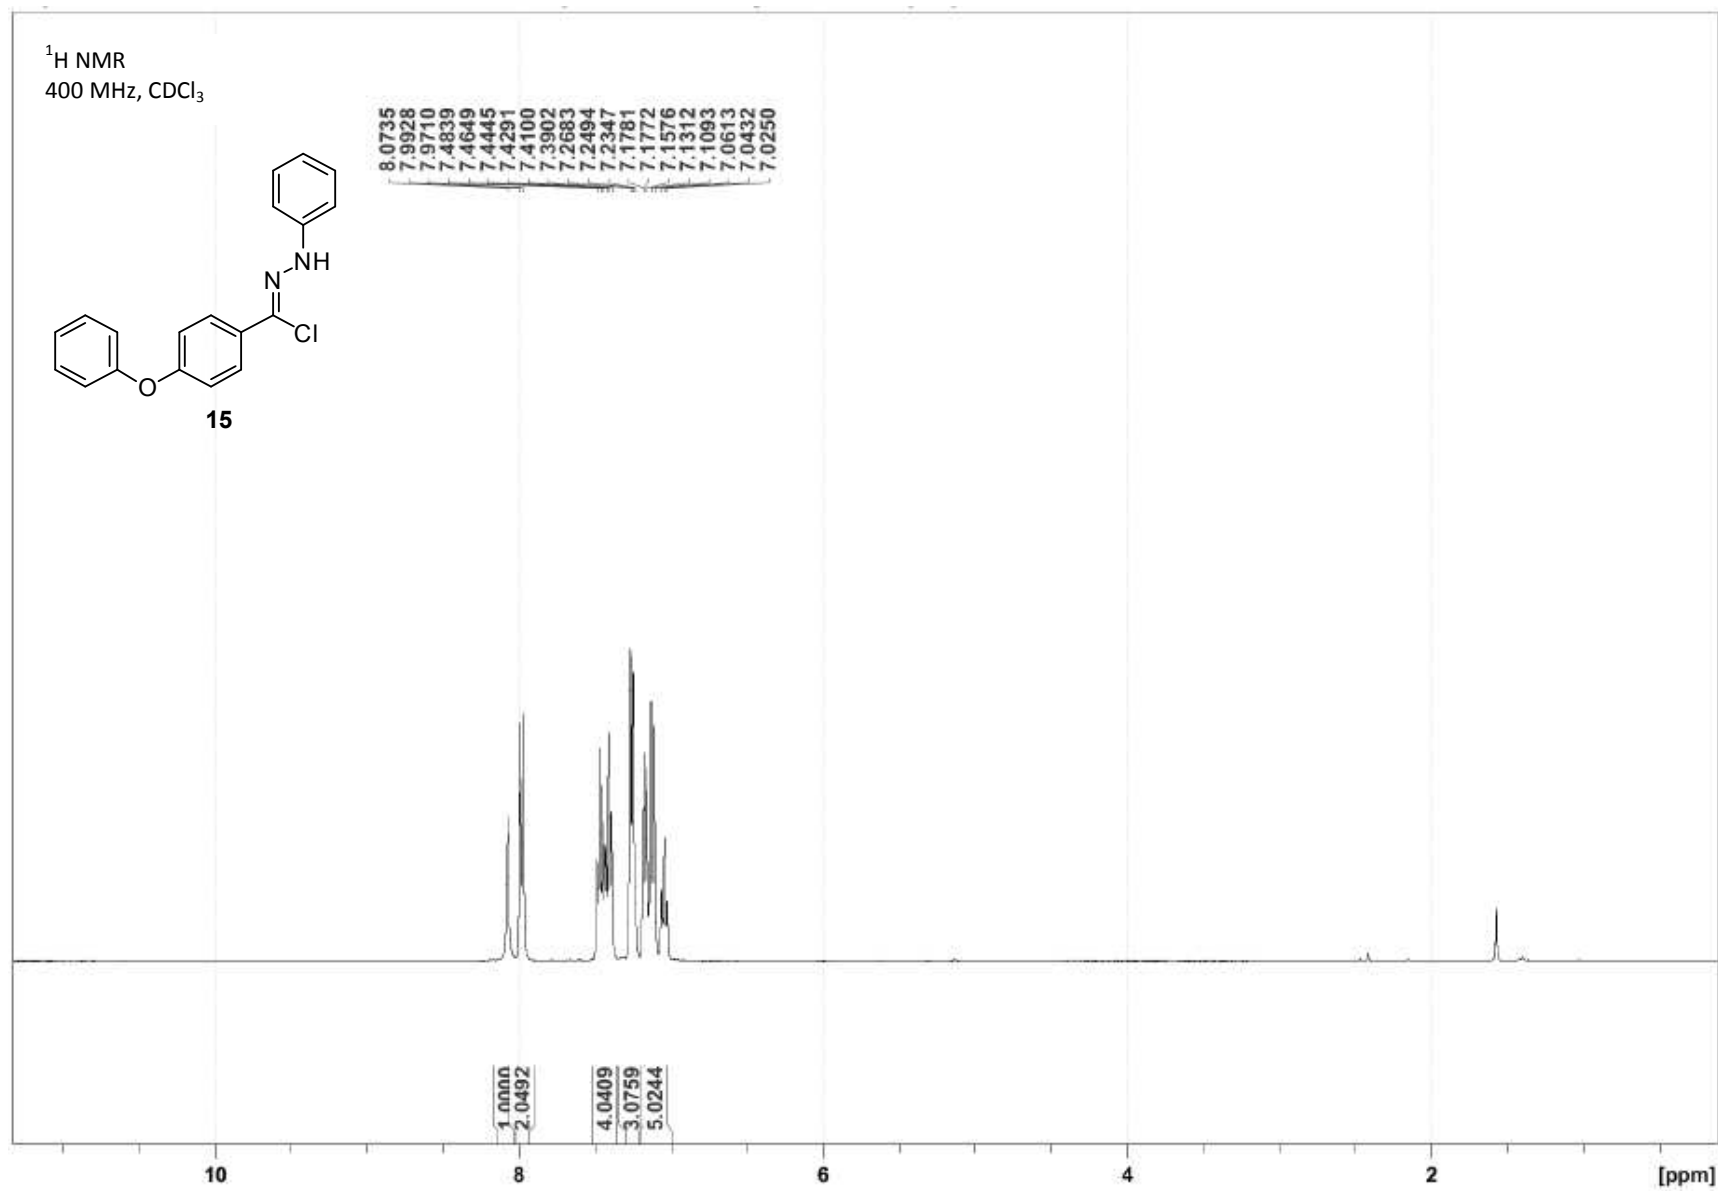

<sup>13</sup>C NMR  
100 MHz, CDCl<sub>3</sub>

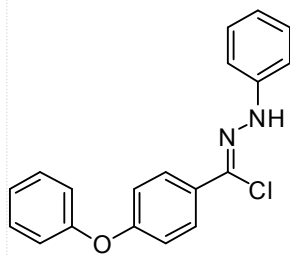

**15**

— M 158.5818  
— M 156.6194

— M 143.5107

M 130.0569  
M 129.5212  
M 129.4233  
M 128.1357  
M 124.3344  
M 124.0047  
M 121.1873  
M 119.5390  
M 118.3595  
M 113.4972

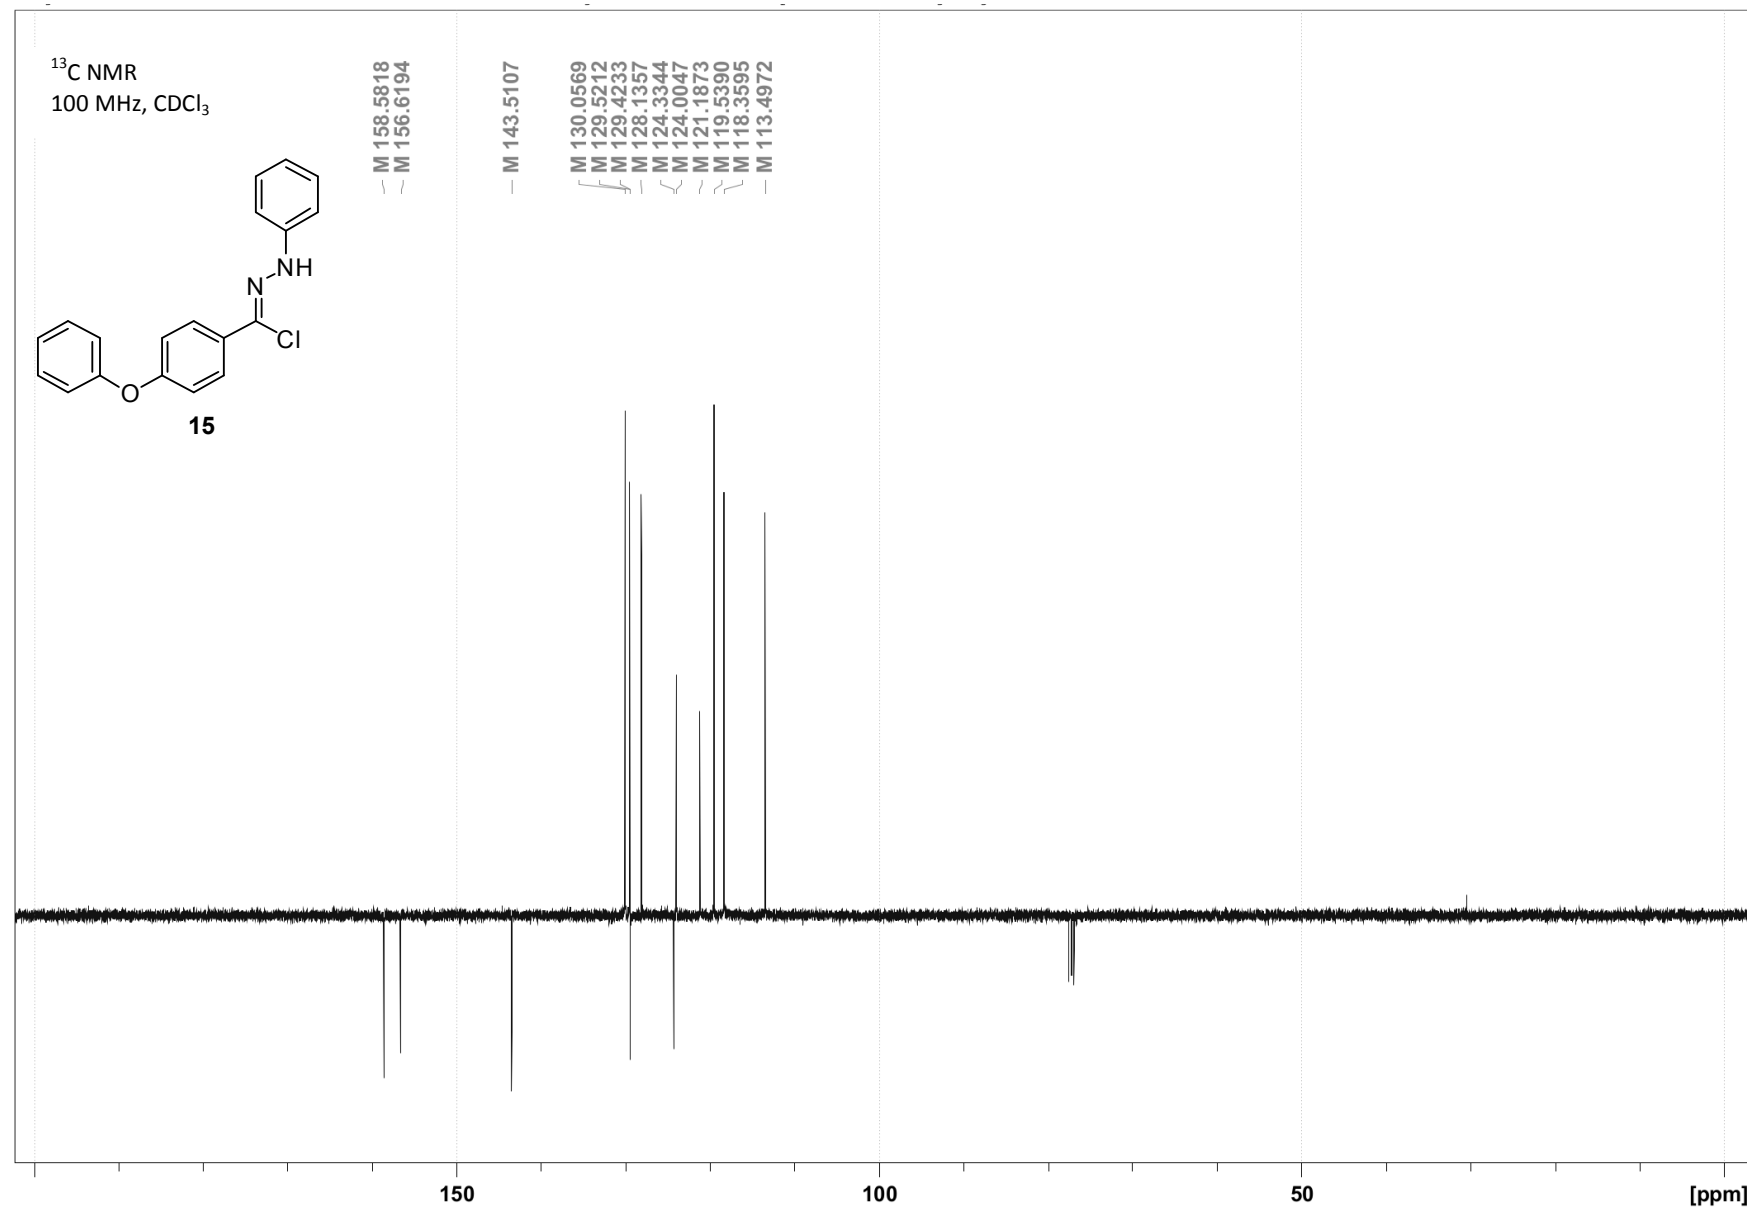

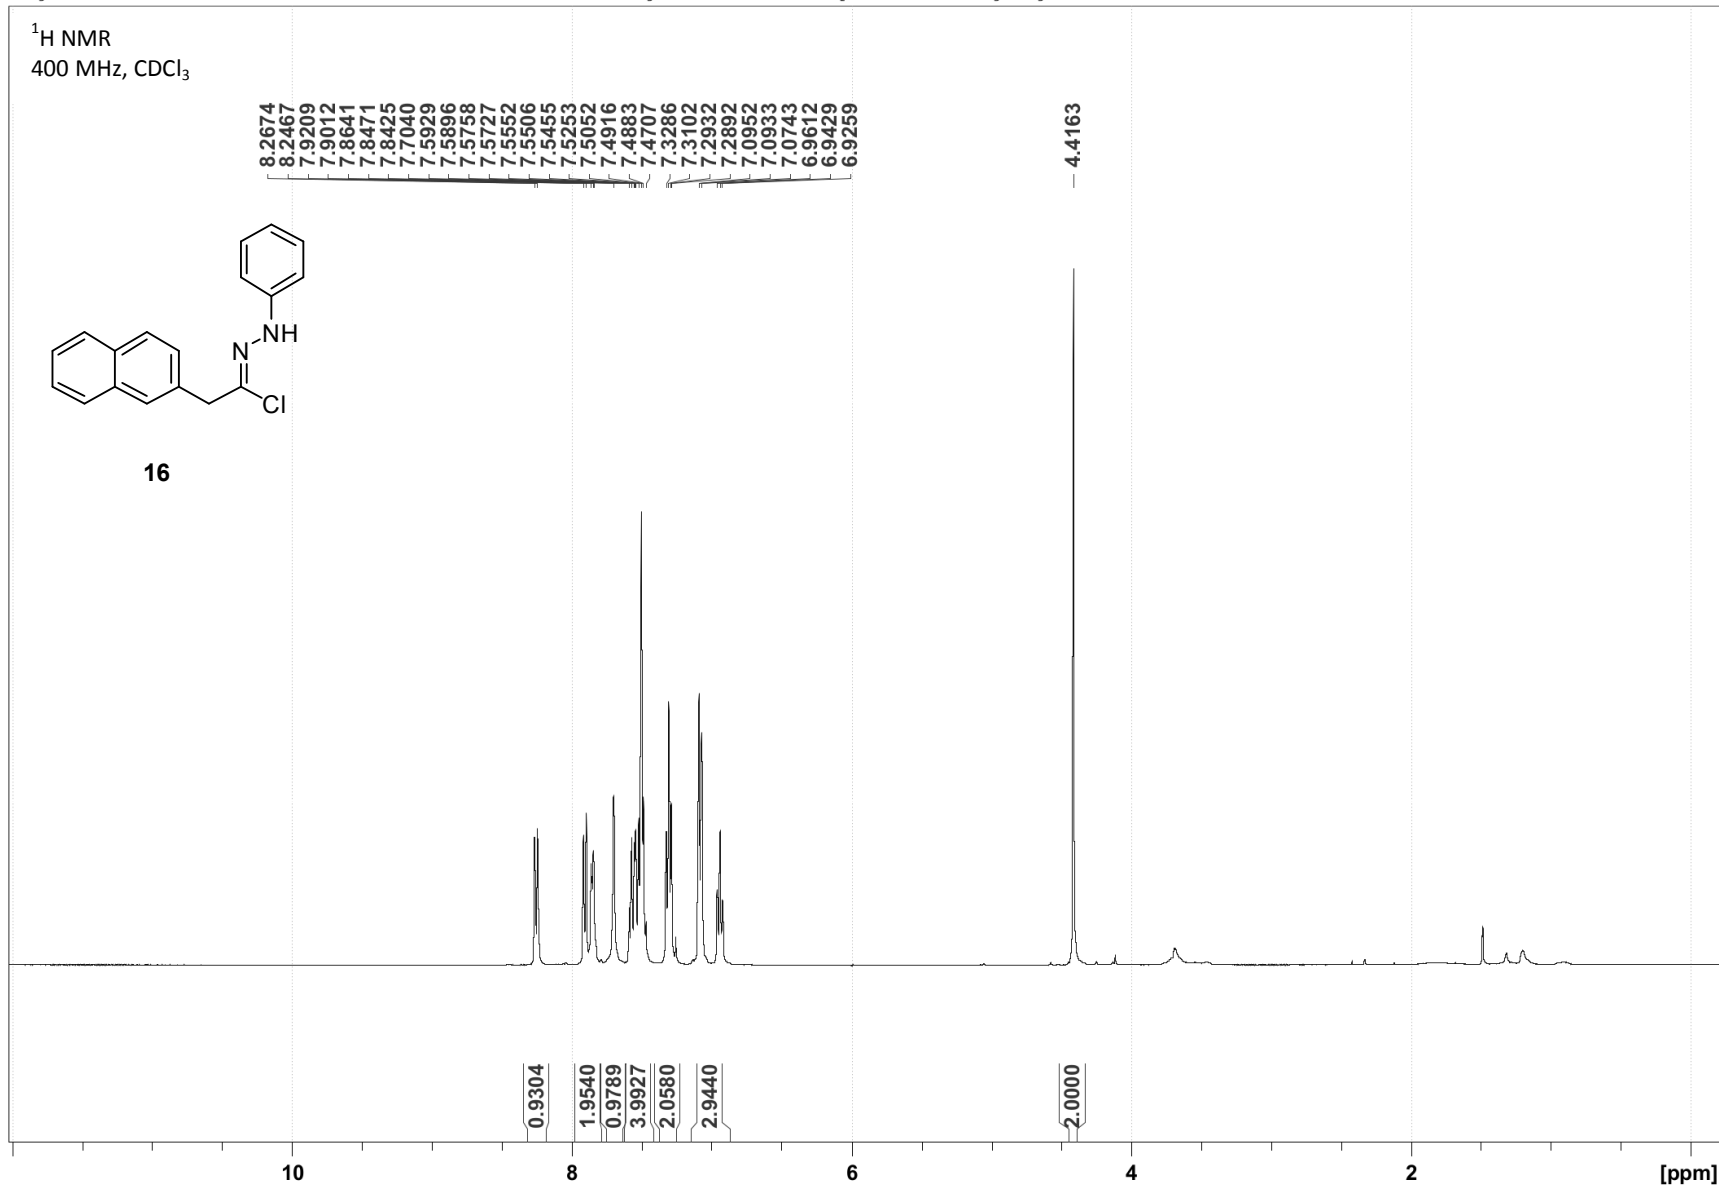



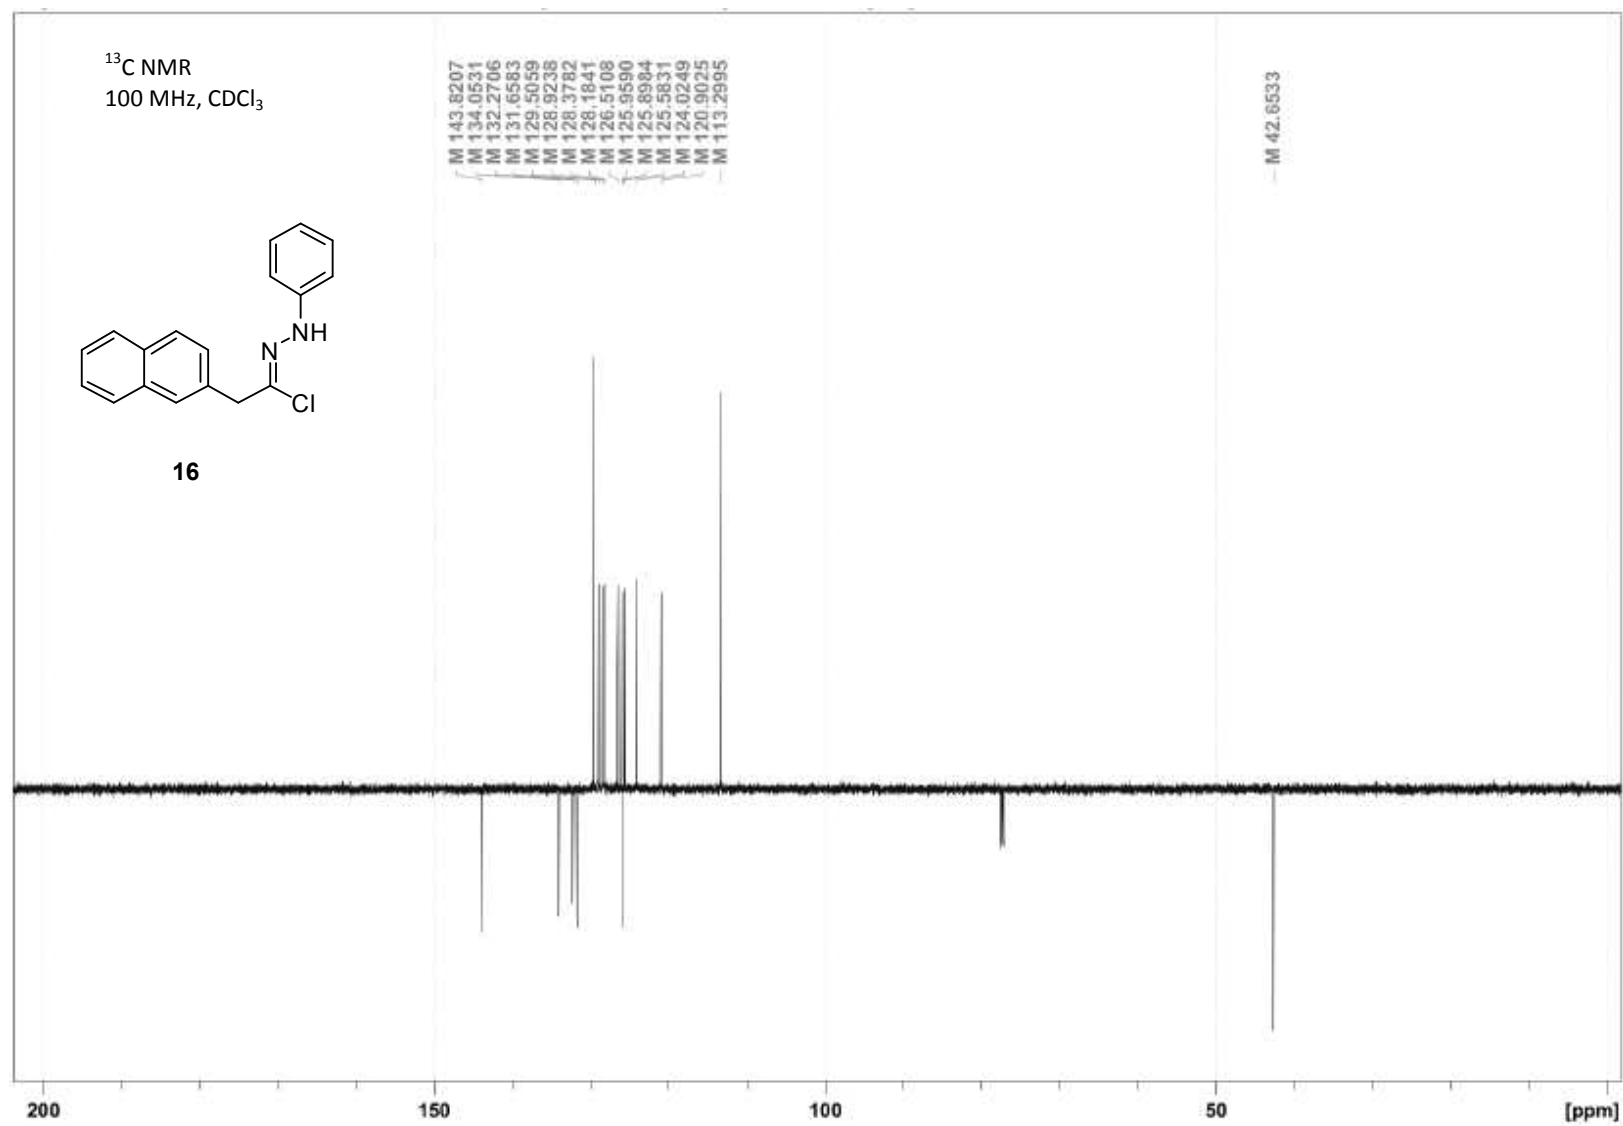

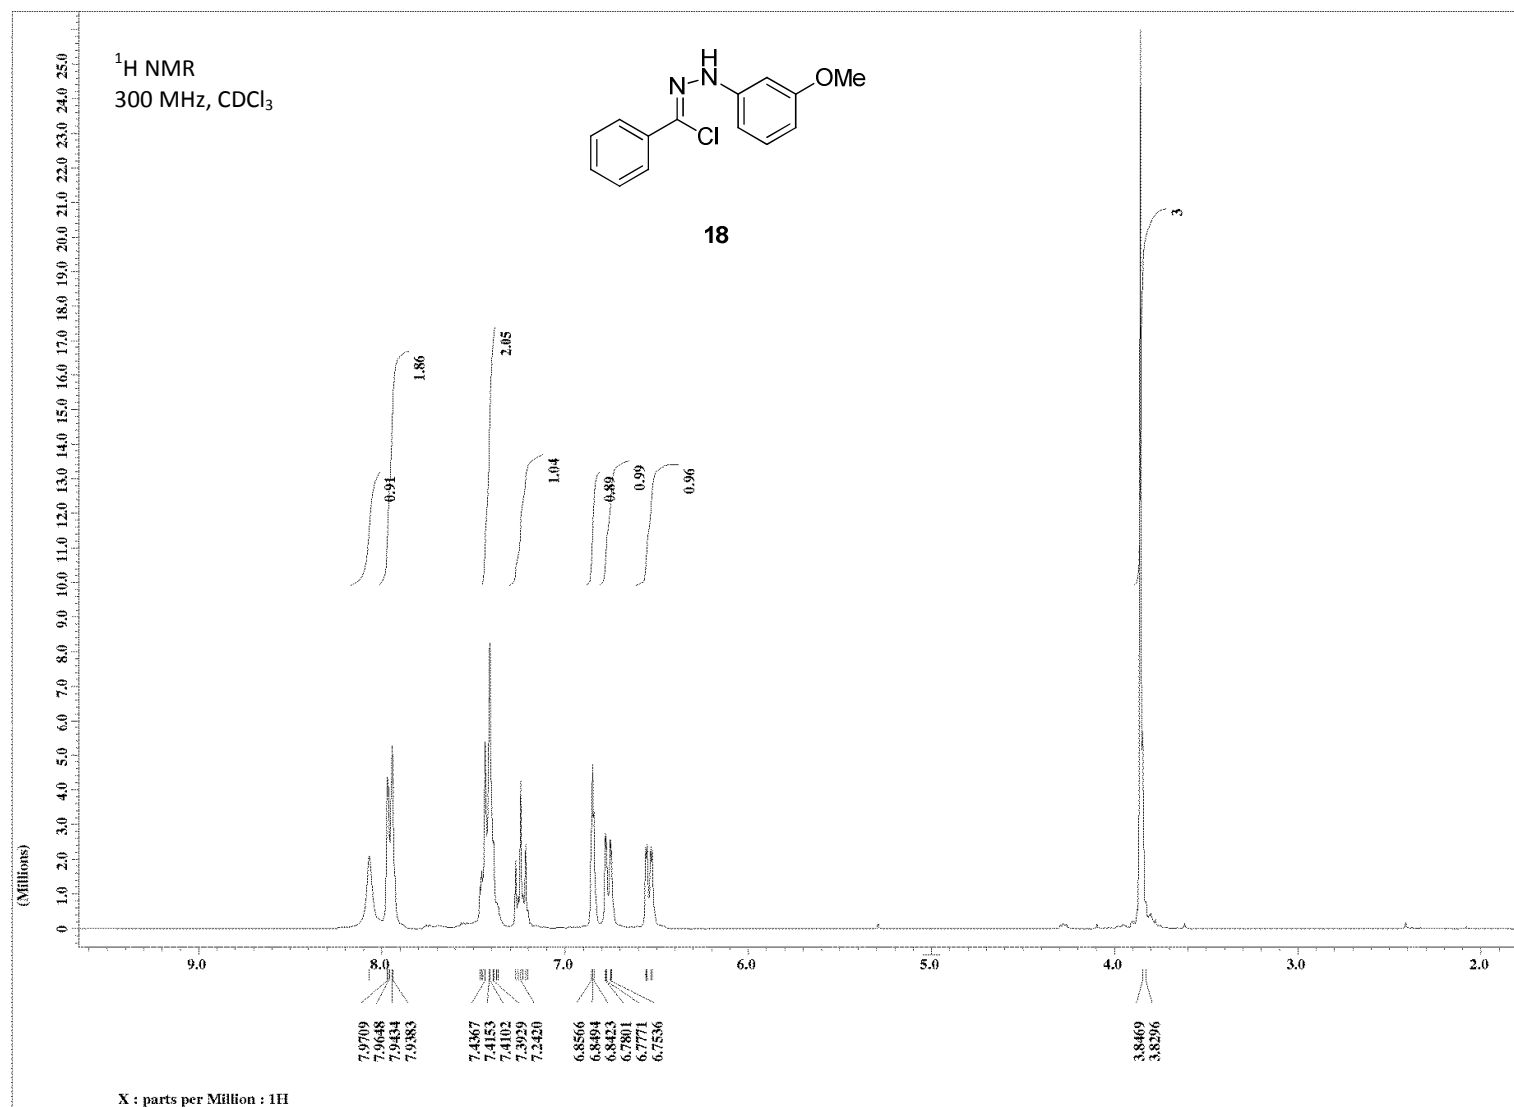

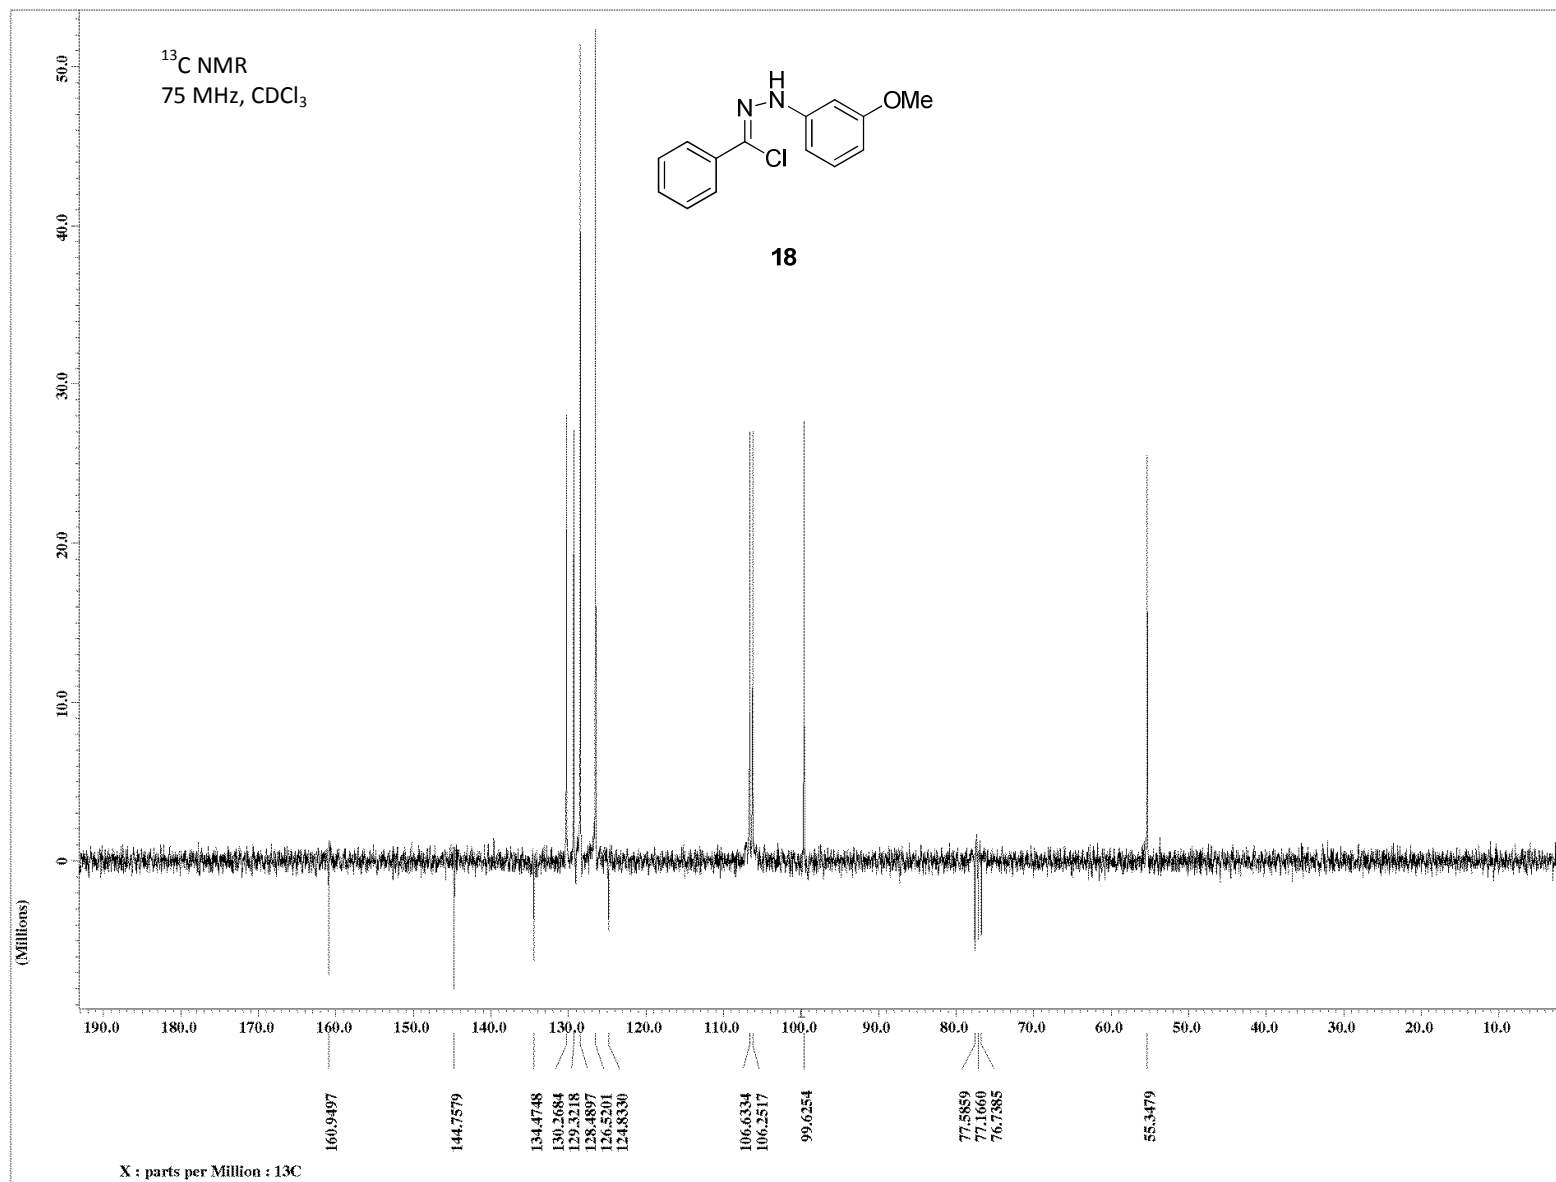

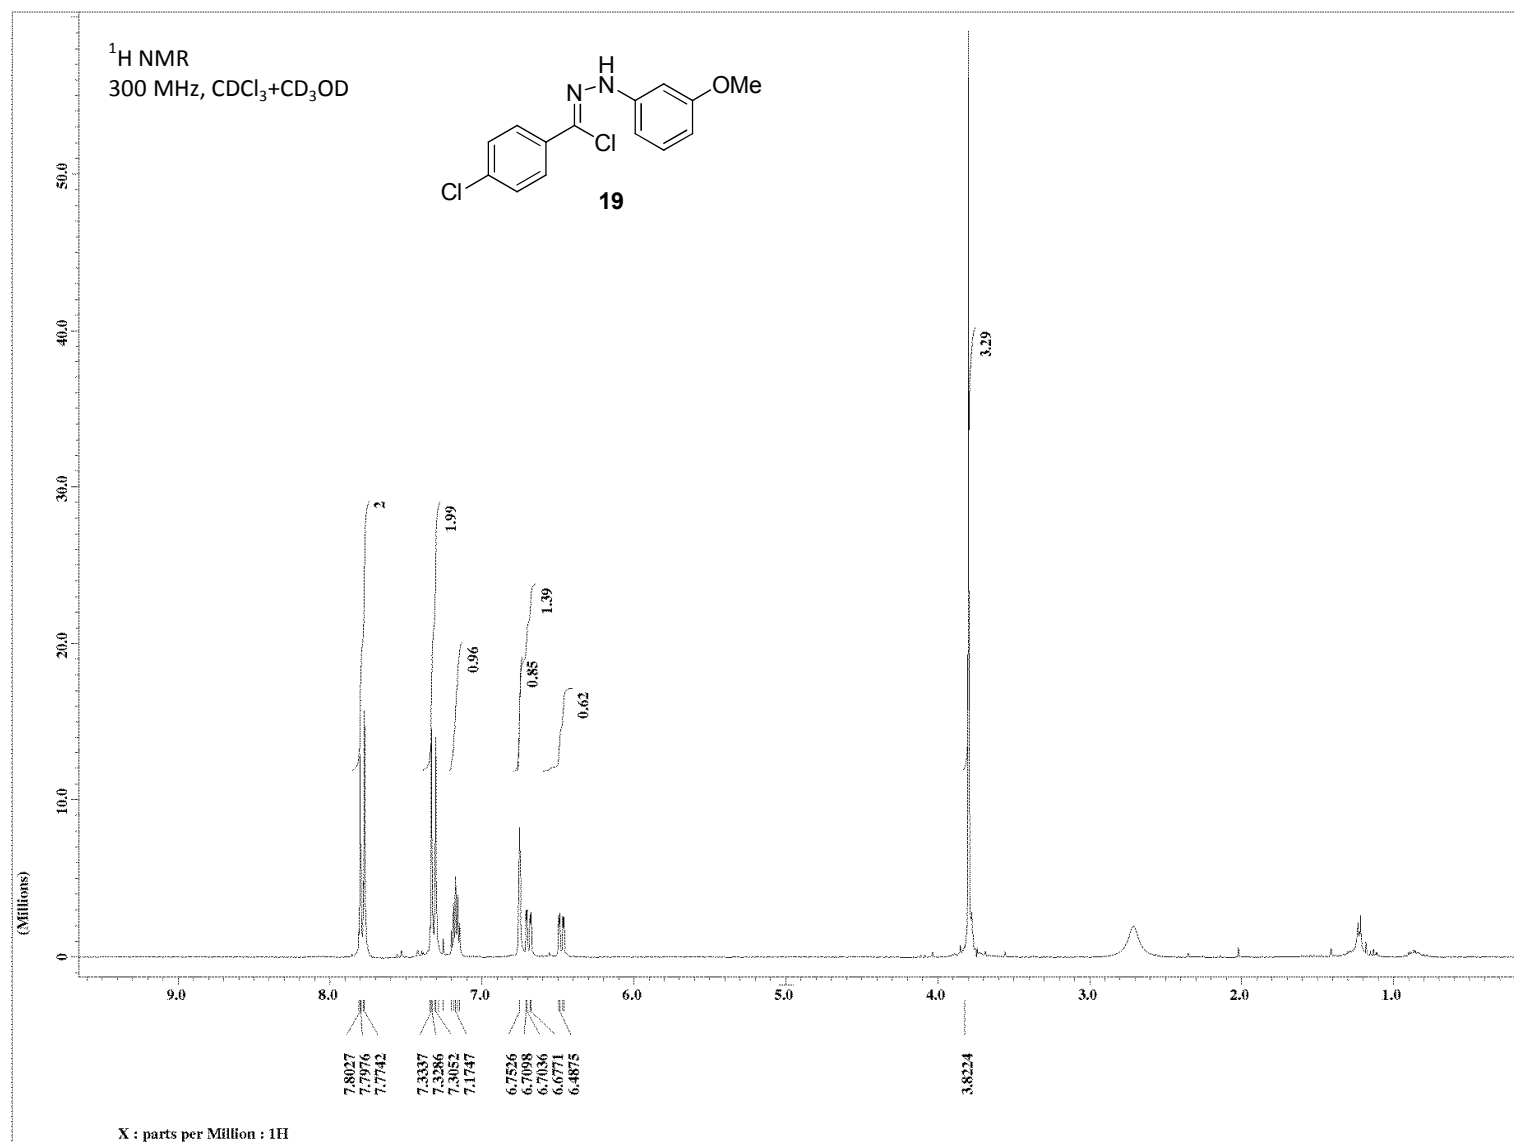

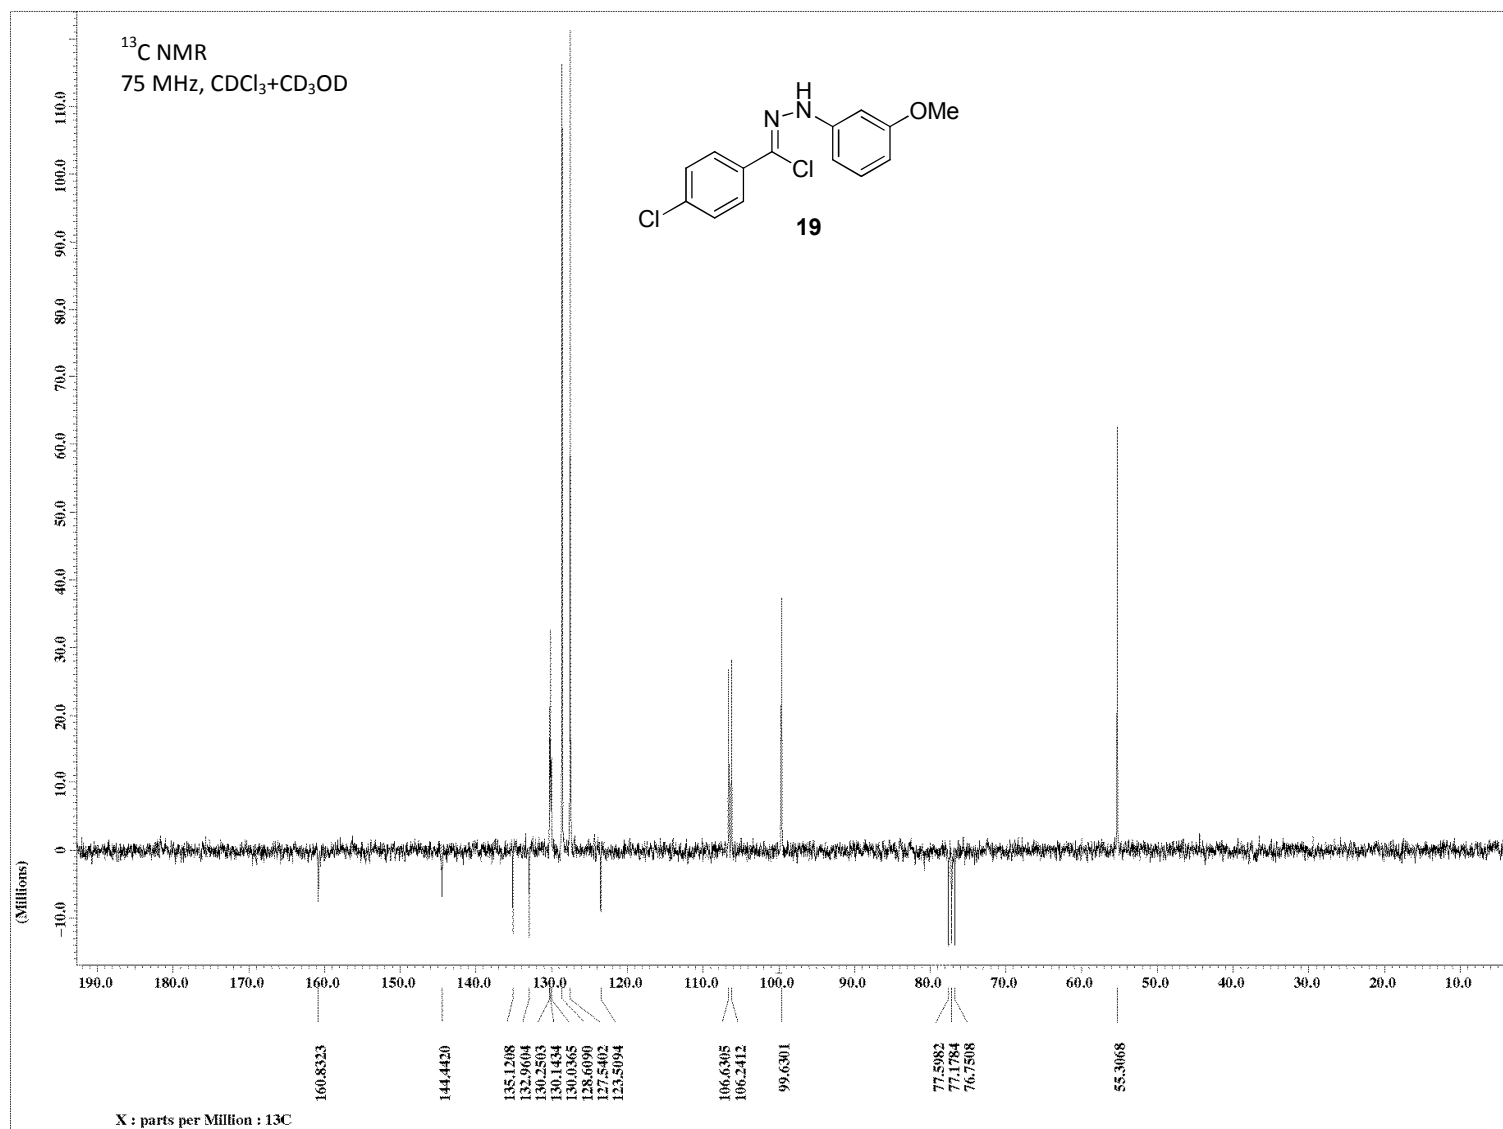

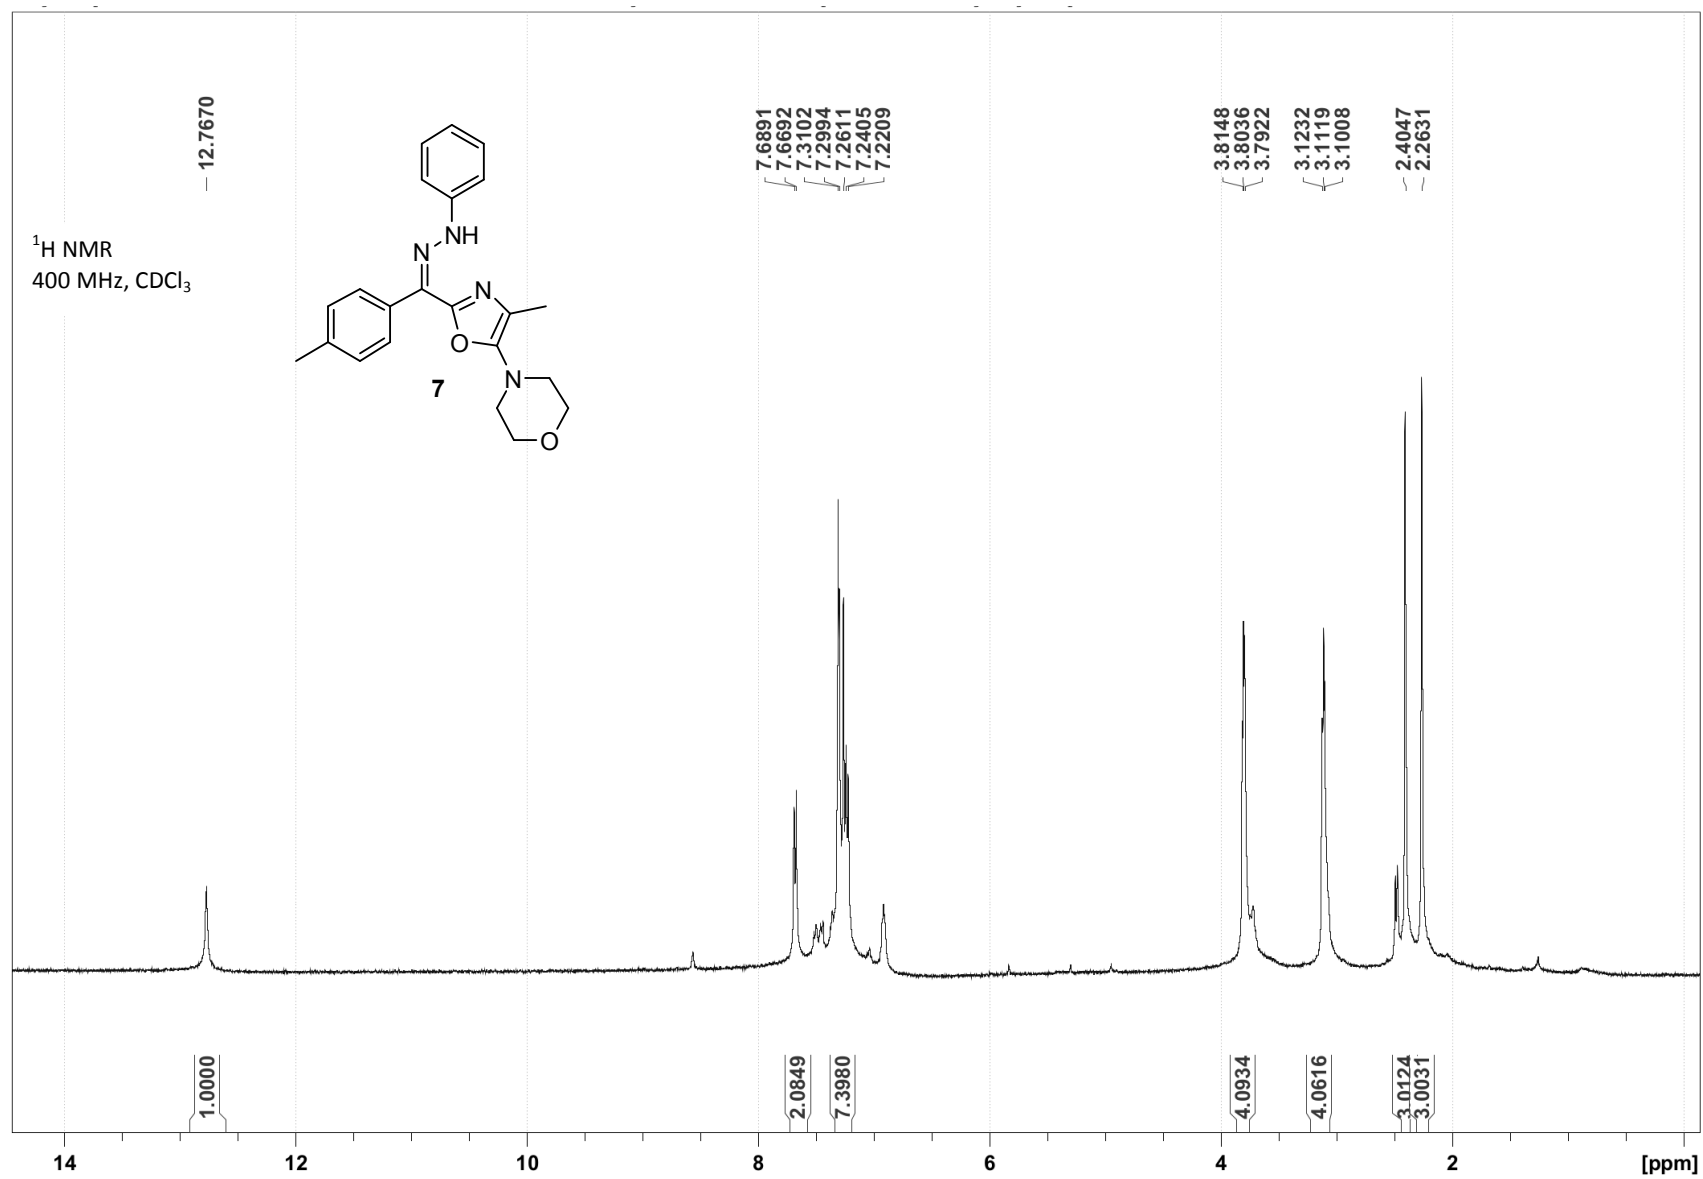

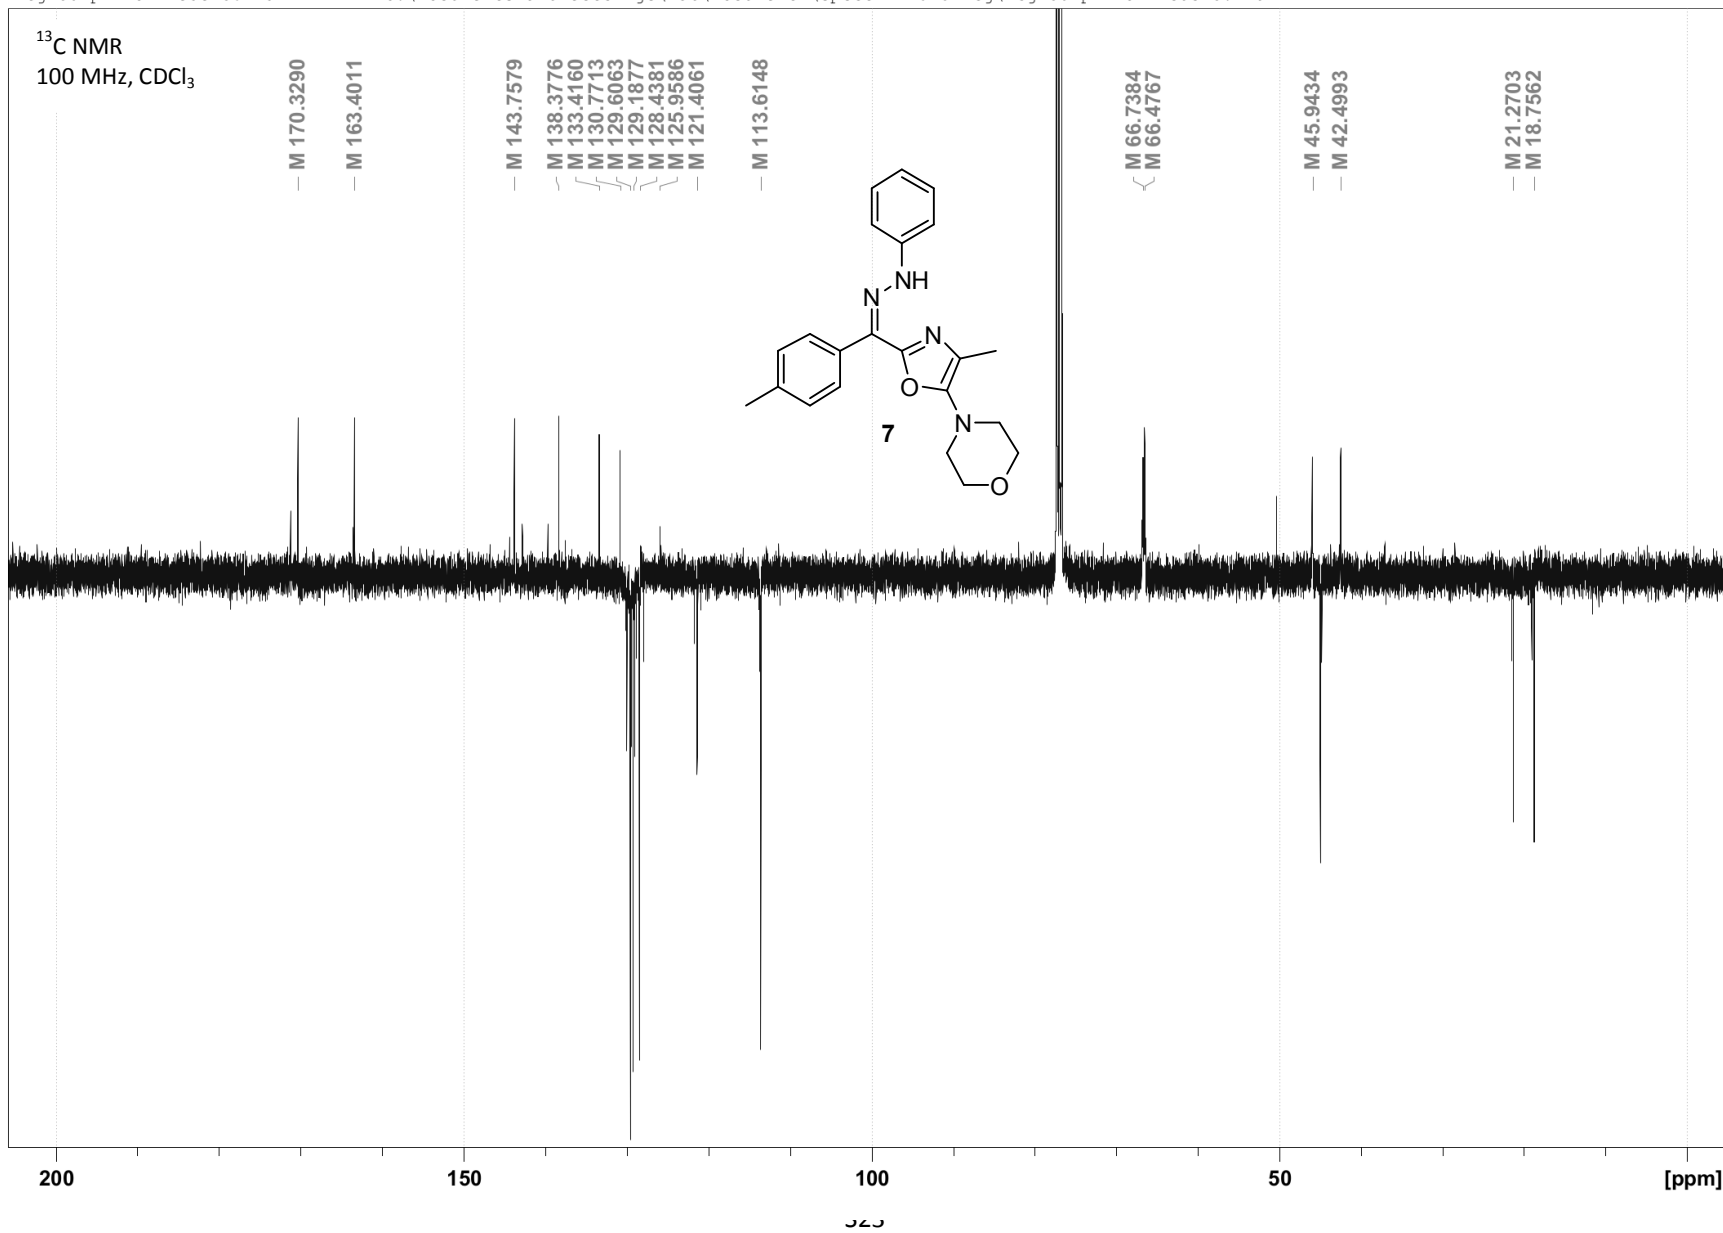

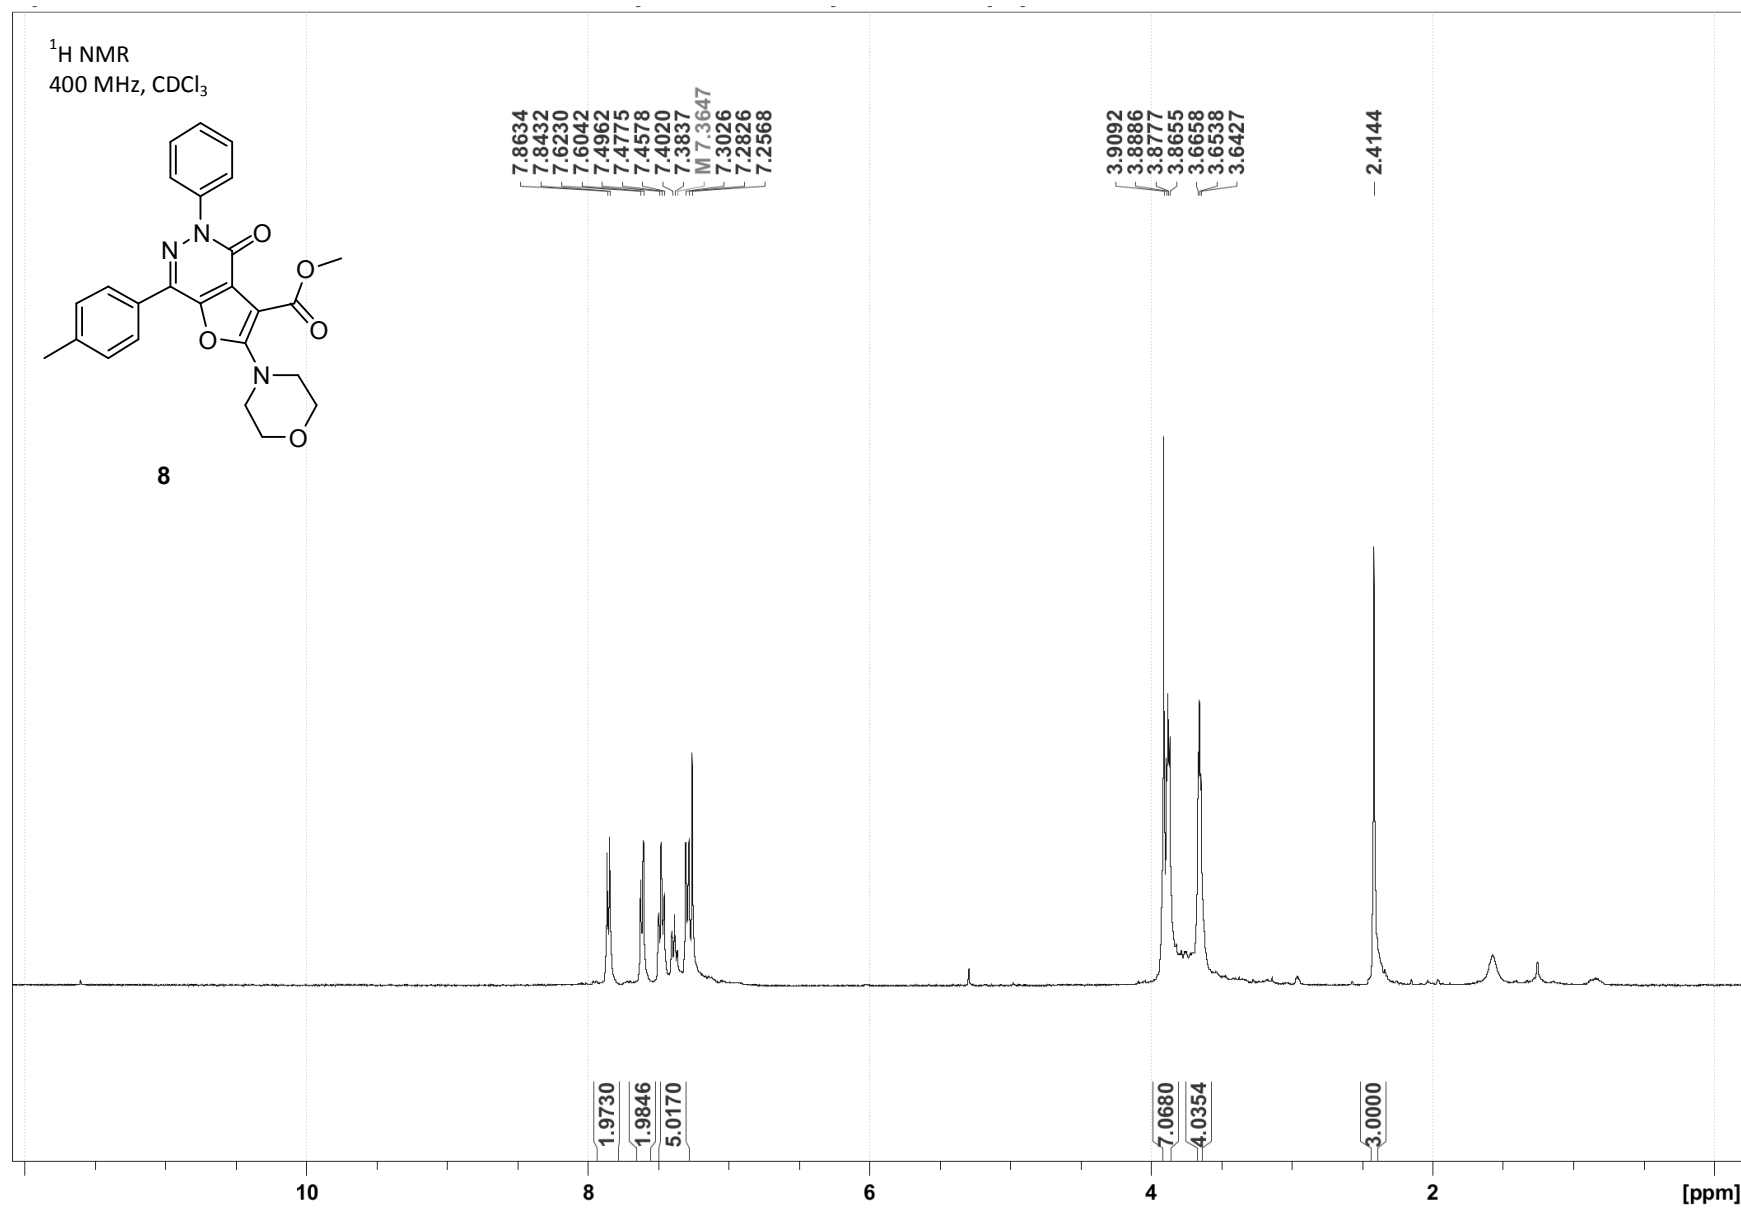



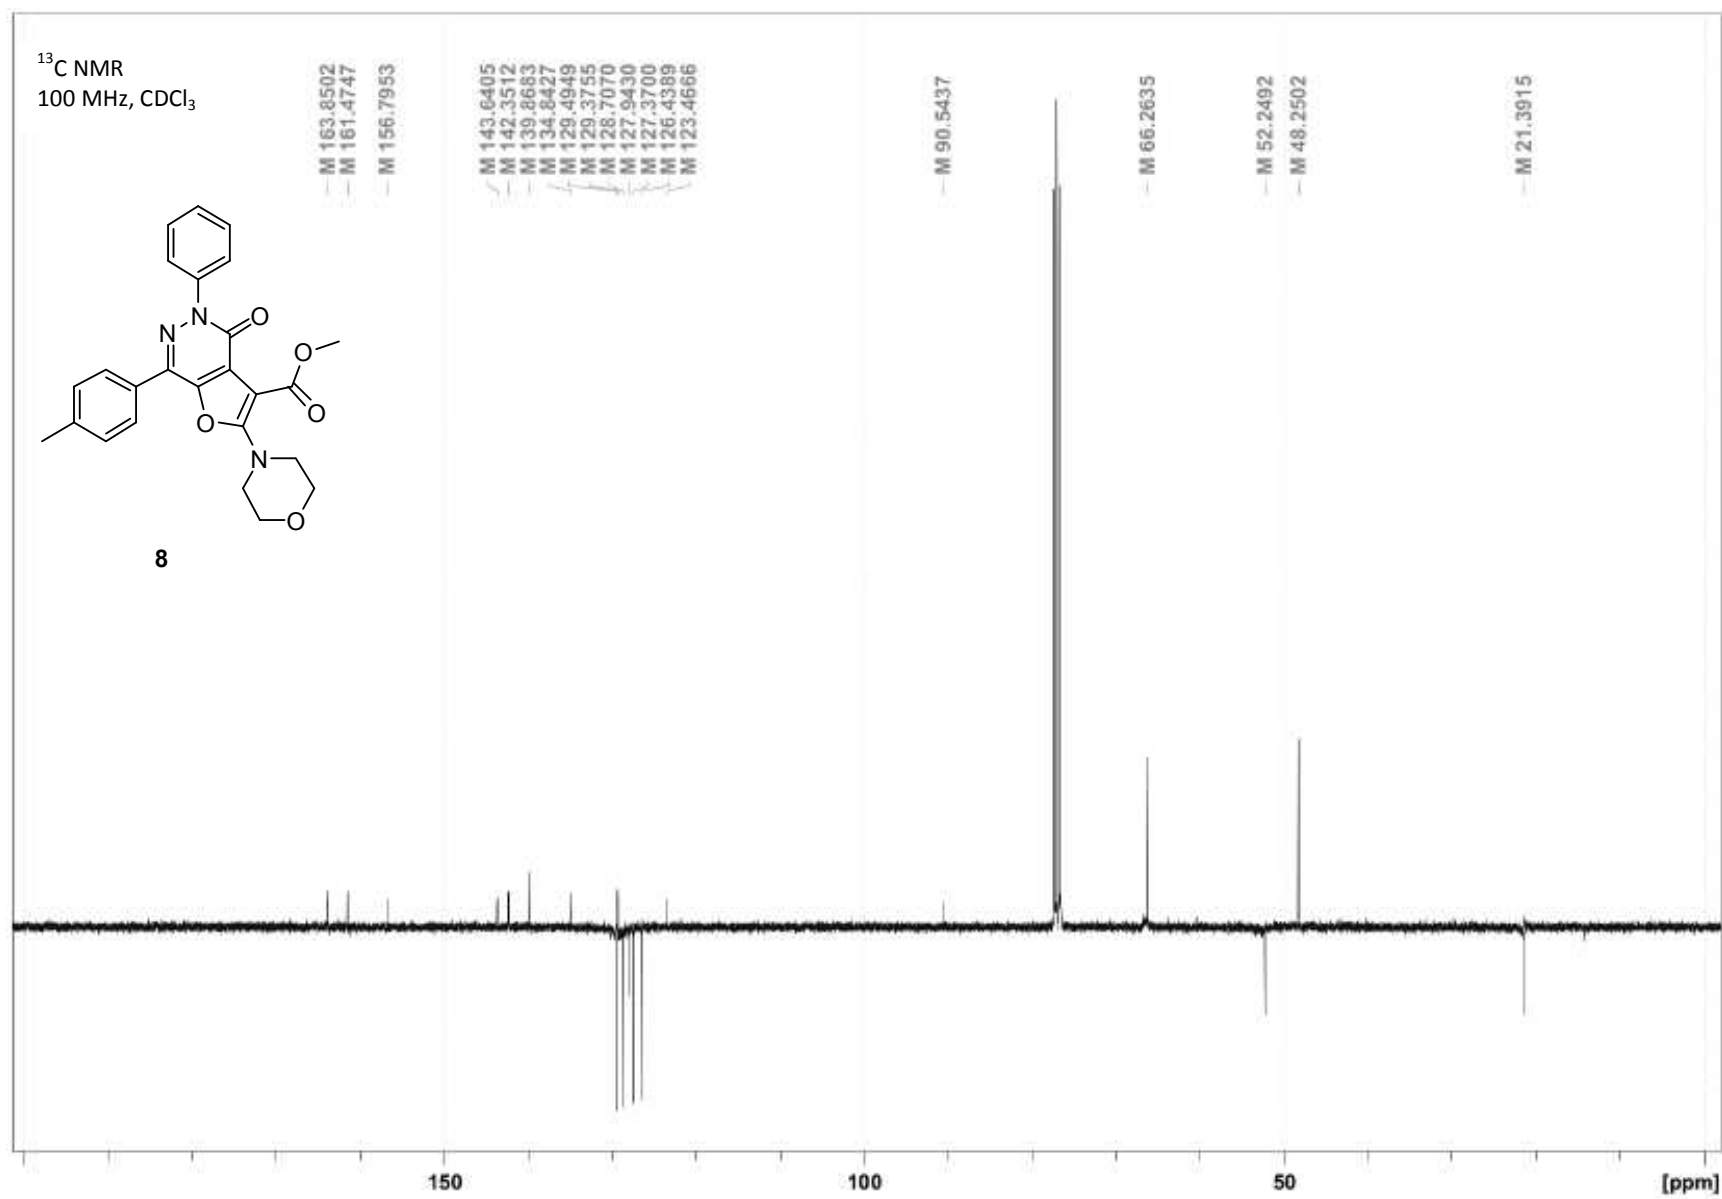

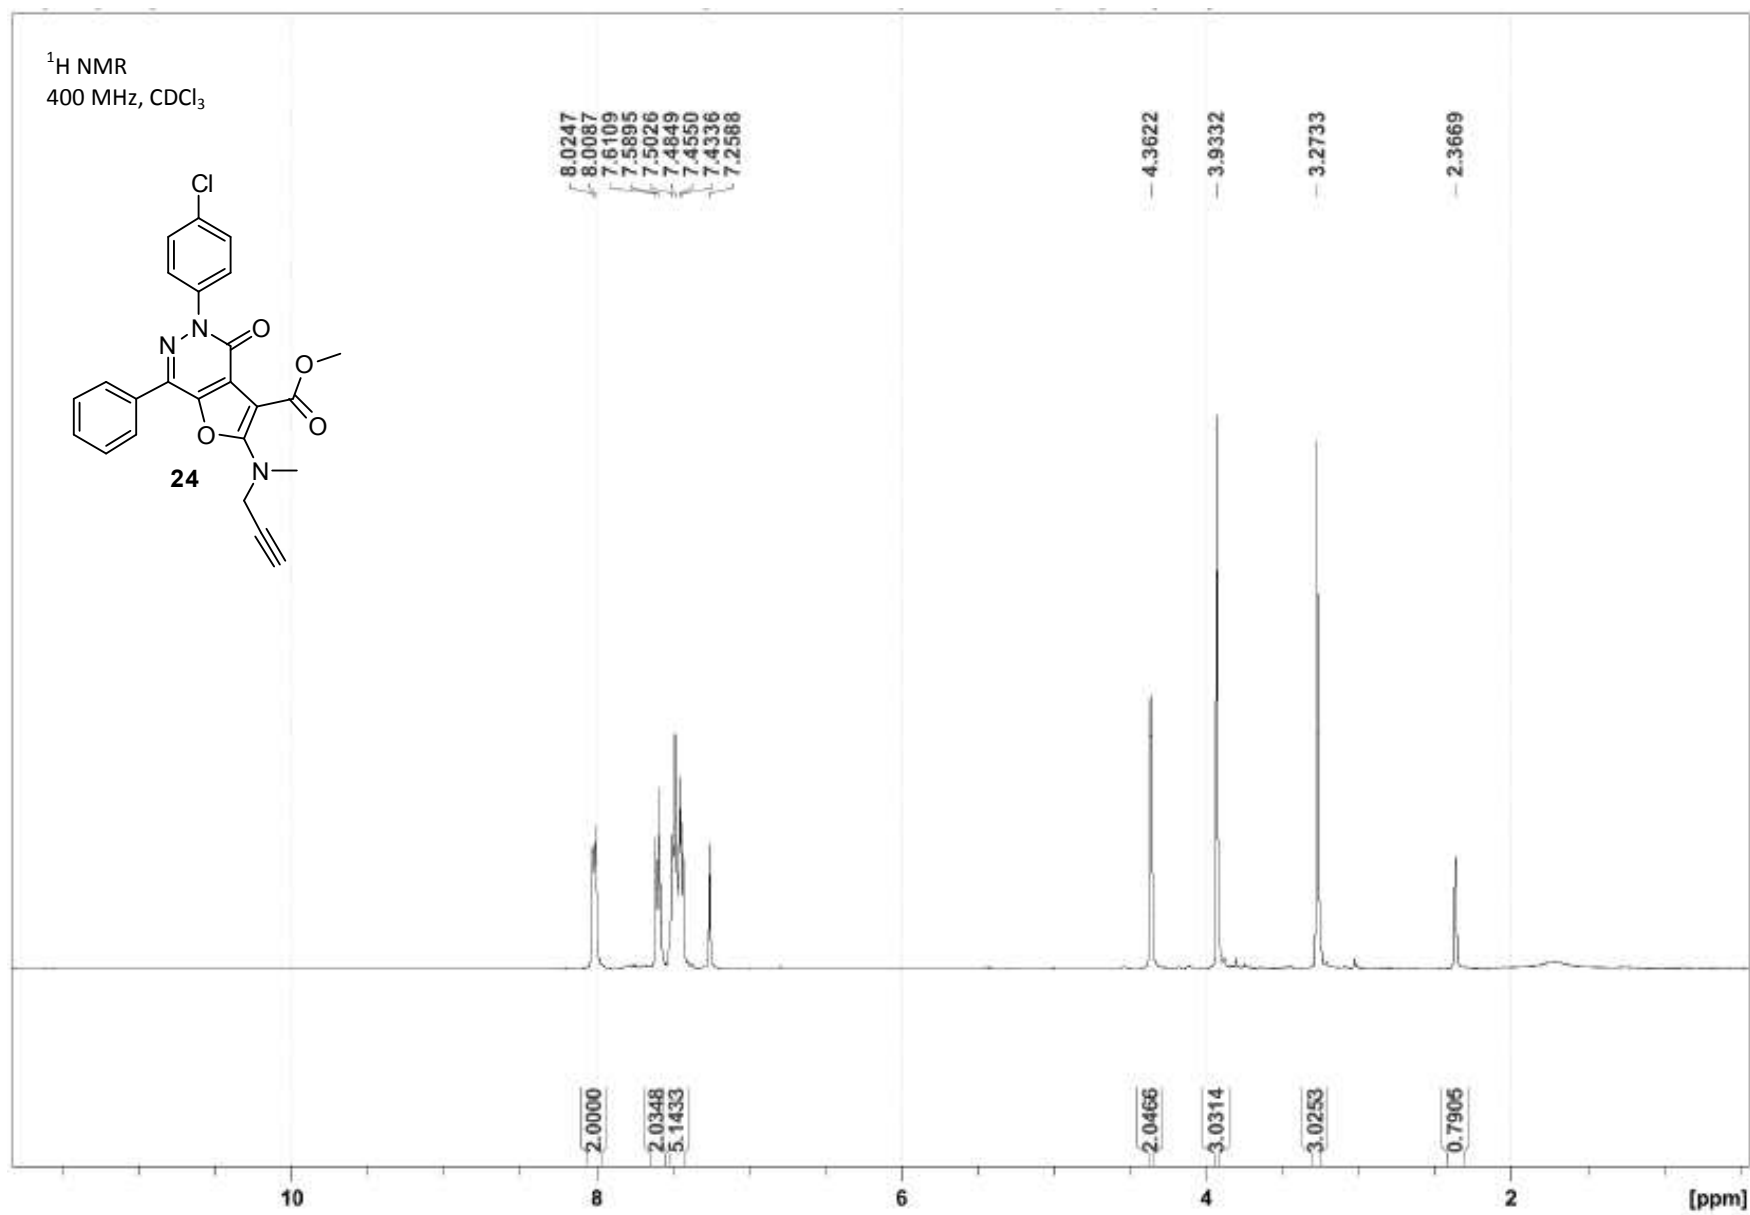

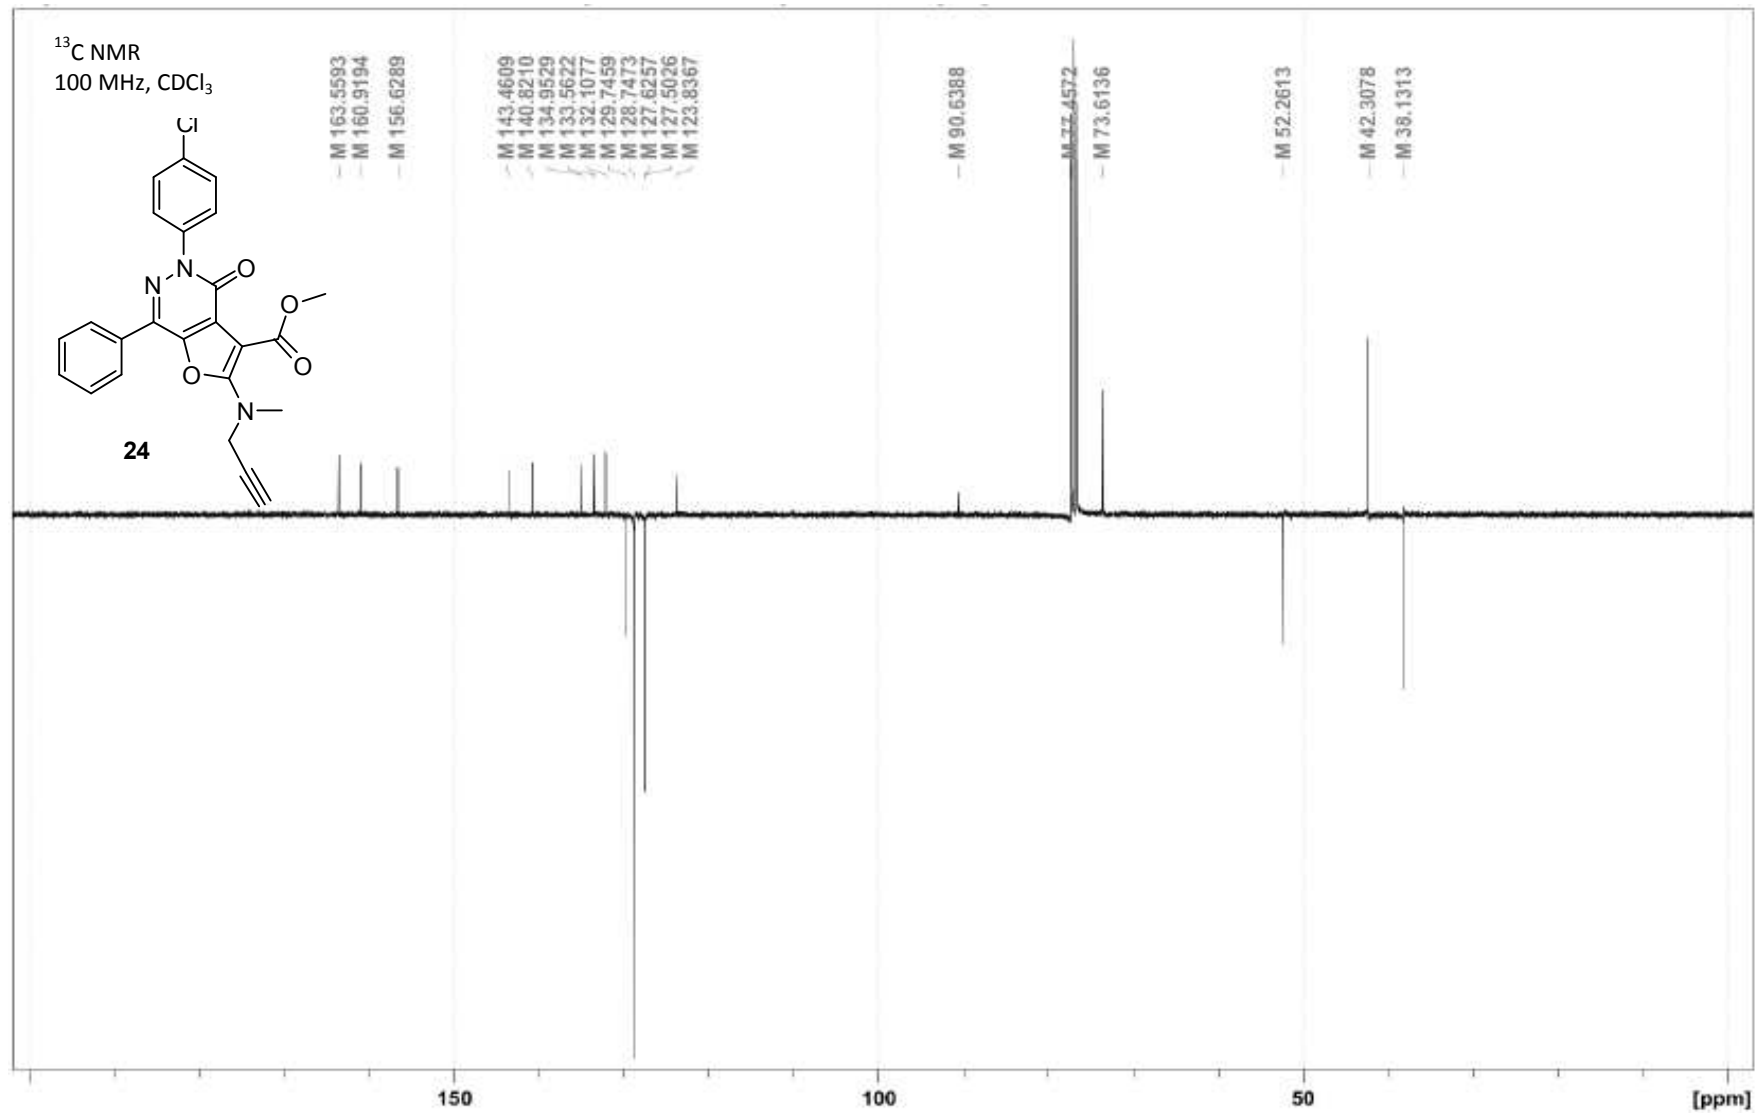

<sup>1</sup>H NMR  
400 MHz, CDCl<sub>3</sub>

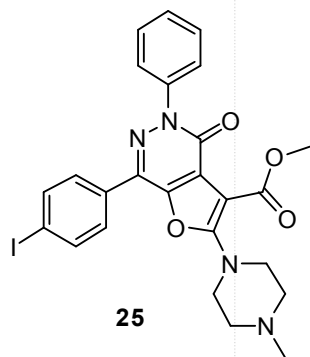

7.8384  
7.8176  
7.7226  
7.7017  
7.6032  
7.5839  
7.4973  
7.4786  
7.4590  
7.4089  
7.3908  
7.3726

3.9049  
M 3.7215  
3.7072  
M 3.6941

M 2.6598  
2.6405  
M 2.6233  
2.4030

3.8814  
4.9026

3.0460  
4.0142

4.0020  
3.0000

[ppm]

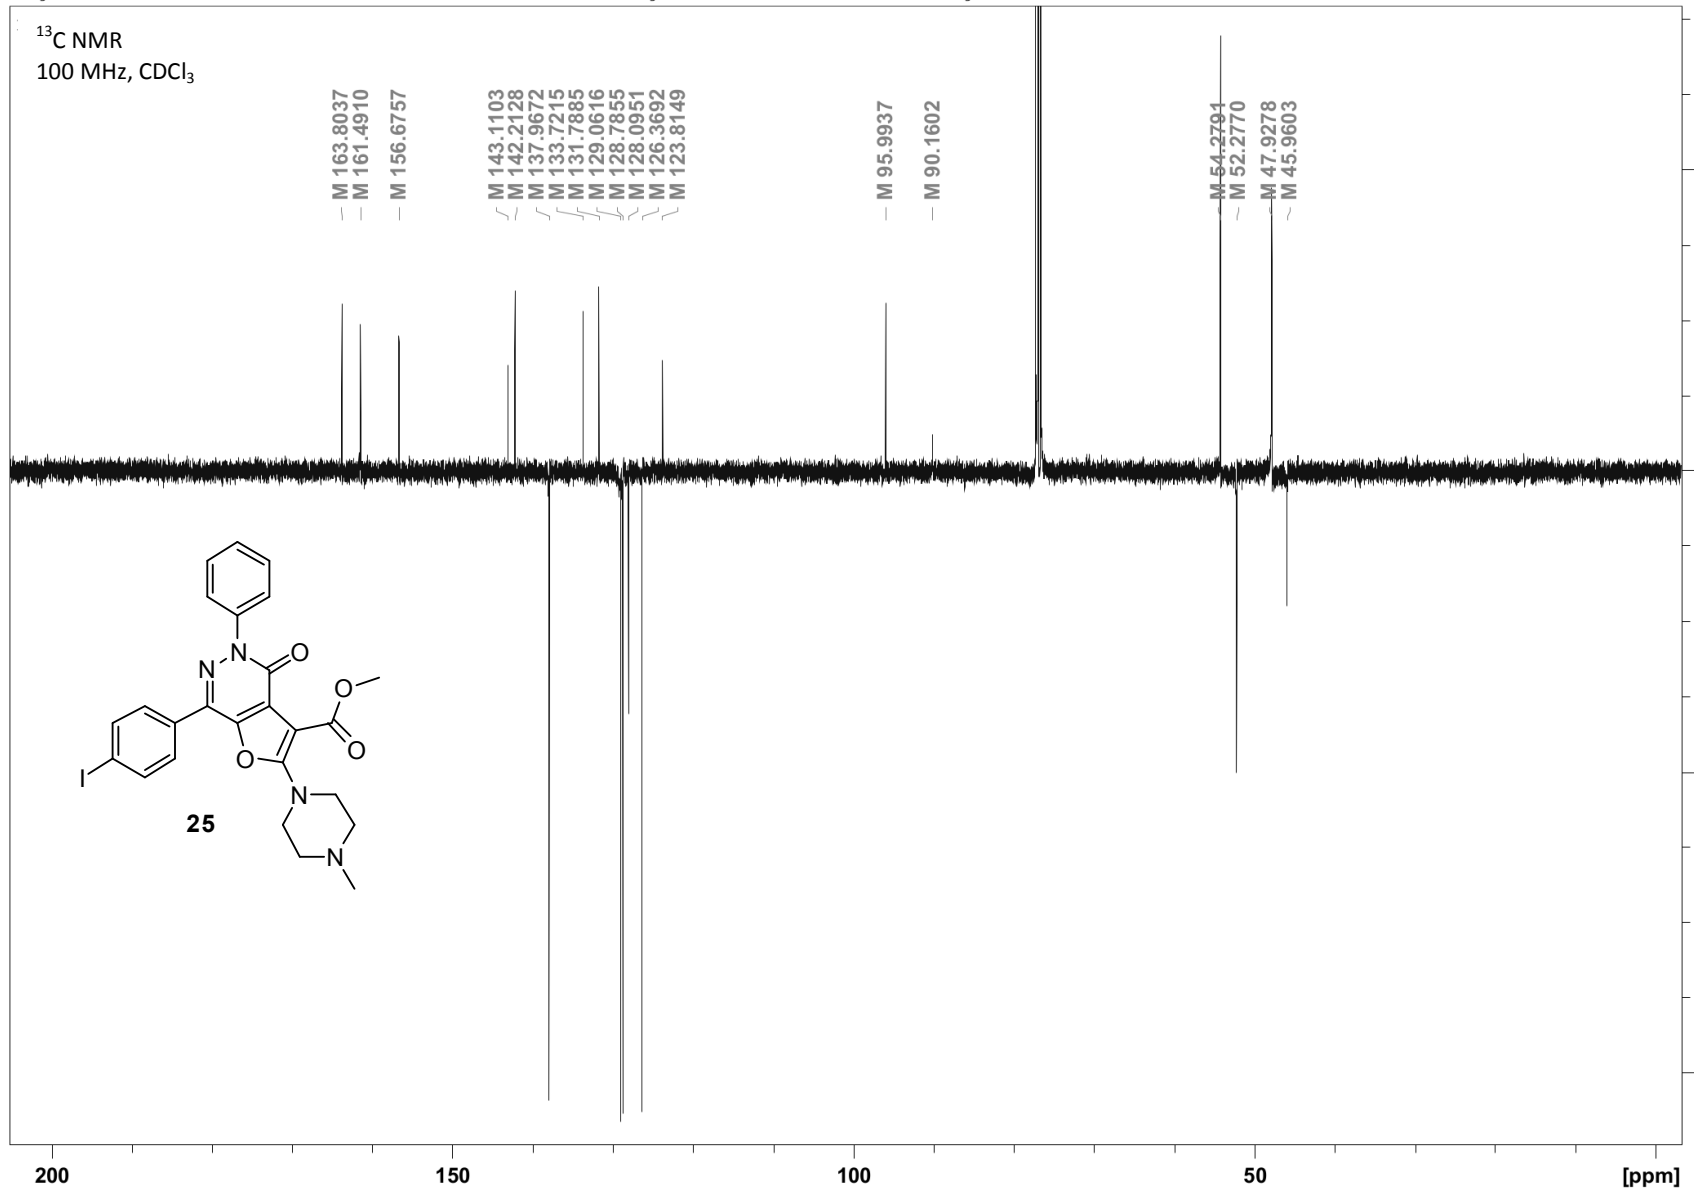

<sup>1</sup>H NMR  
400 MHz, CDCl<sub>3</sub>

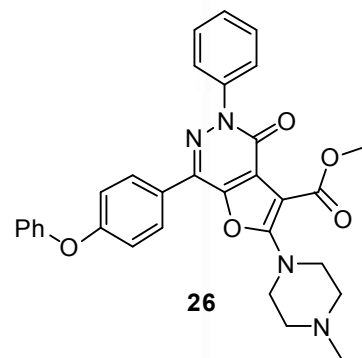

7.9512  
7.9295  
7.6107  
7.5915  
7.4879  
7.4692  
7.4496  
7.3923  
7.3731  
7.3526  
7.2523  
7.1753  
7.1568  
7.1384  
7.0942  
7.0731  
7.0552

3.9020  
M 3.7499  
M 3.7417  
3.7287  
M 3.7137  
M 3.7079

M 2.7083  
M 2.7020  
2.6842  
M 2.6684  
M 2.6593  
2.4257

2.0000  
2.0124  
2.0608  
3.0991  
5.0624

3.0071  
4.0350

4.0901  
3.0857

10

8

6

4

2

[ppm]

$^{13}\text{C}$  NMR  
100 MHz,  $\text{CDCl}_3$

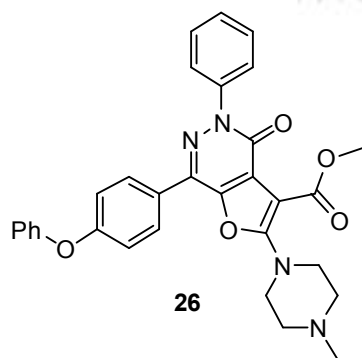

M 163.8297  
M 161.3192  
M 158.9311  
M 156.6654  
M 156.3899

M 143.3778  
M 142.4287  
M 134.1316  
M 129.8759  
M 128.9880  
M 128.6512  
M 127.8245  
M 126.9979  
M 126.3549  
M 123.9668  
M 123.6301  
M 119.5580  
M 118.4558

M 94.0681

M 54.2221  
M 52.1402  
M 47.7620  
M 45.7413

150

100

50

[ppm]

<sup>1</sup>H NMR  
400 MHz, CDCl<sub>3</sub>

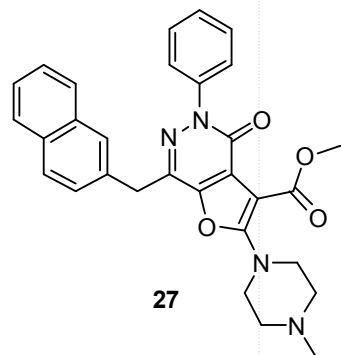

8.3185  
8.2984  
7.8815  
7.8612  
7.7950  
7.7747  
7.5822  
7.5628  
7.5343  
7.5141  
7.4962  
7.4909  
7.4704  
7.4338  
7.4132  
7.3920  
7.3729

— 4.6135

— 3.8278

3.4031

3.3915

3.3798

2.4122

2.4008

2.3895

2.3021

0.9073

2.0638

9.0479

2.0000

3.0987

4.0988

1.0605

3.0387

10

8

6

4

2

[ppm]



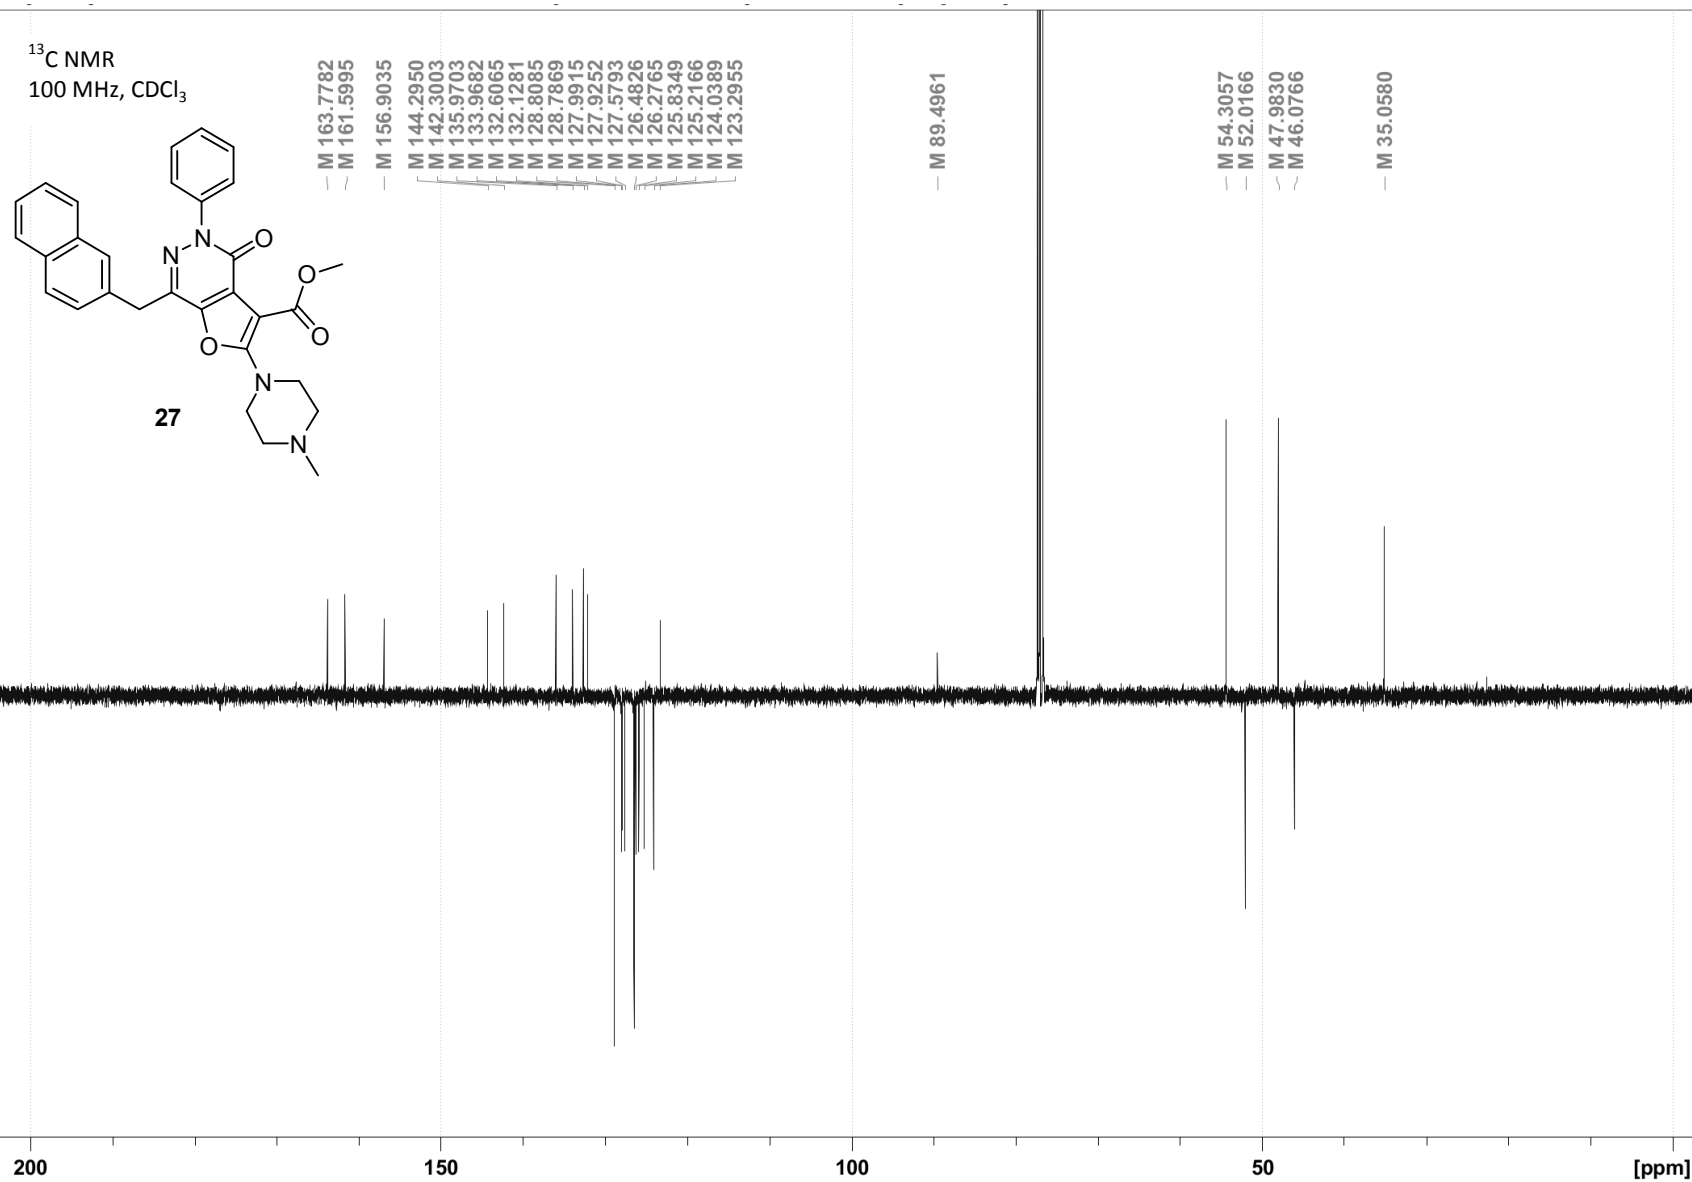

<sup>1</sup>H NMR  
400 MHz, CDCl<sub>3</sub>

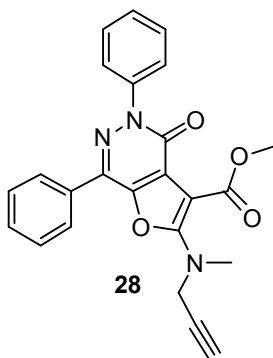

8.0480  
8.0439  
8.0278  
8.0246  
7.6328  
7.6129  
7.5170  
7.5101  
7.5019  
7.4953  
7.4830  
7.4770  
7.4640  
7.4078  
7.3893  
7.3710  
7.2587

4.3709  
4.3652

3.9329

3.2742

2.3697  
2.3639  
2.3581

2.0000

8.4952

2.0971

3.0854

3.0832

0.8363

10

8

6

4

2

[ppm]

<sup>13</sup>C NMR  
100 MHz, CDCl<sub>3</sub>

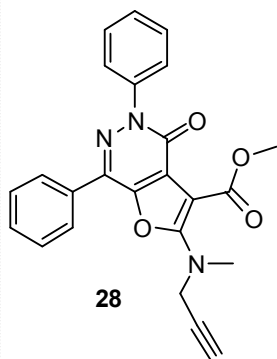

— M 163.7482  
— M 161.0289  
— M 156.7920

— M 143.5606  
— M 142.3367  
— M 134.6551  
— M 132.2251  
— M 129.6572  
— M 128.7537  
— M 128.7092  
— M 127.9482  
— M 127.5298  
— M 126.4216  
— M 123.7068

— M 90.5549

— M 73.5983

— M 52.3604

— M 42.3245  
— M 38.2078

150

100

50

[ppm]

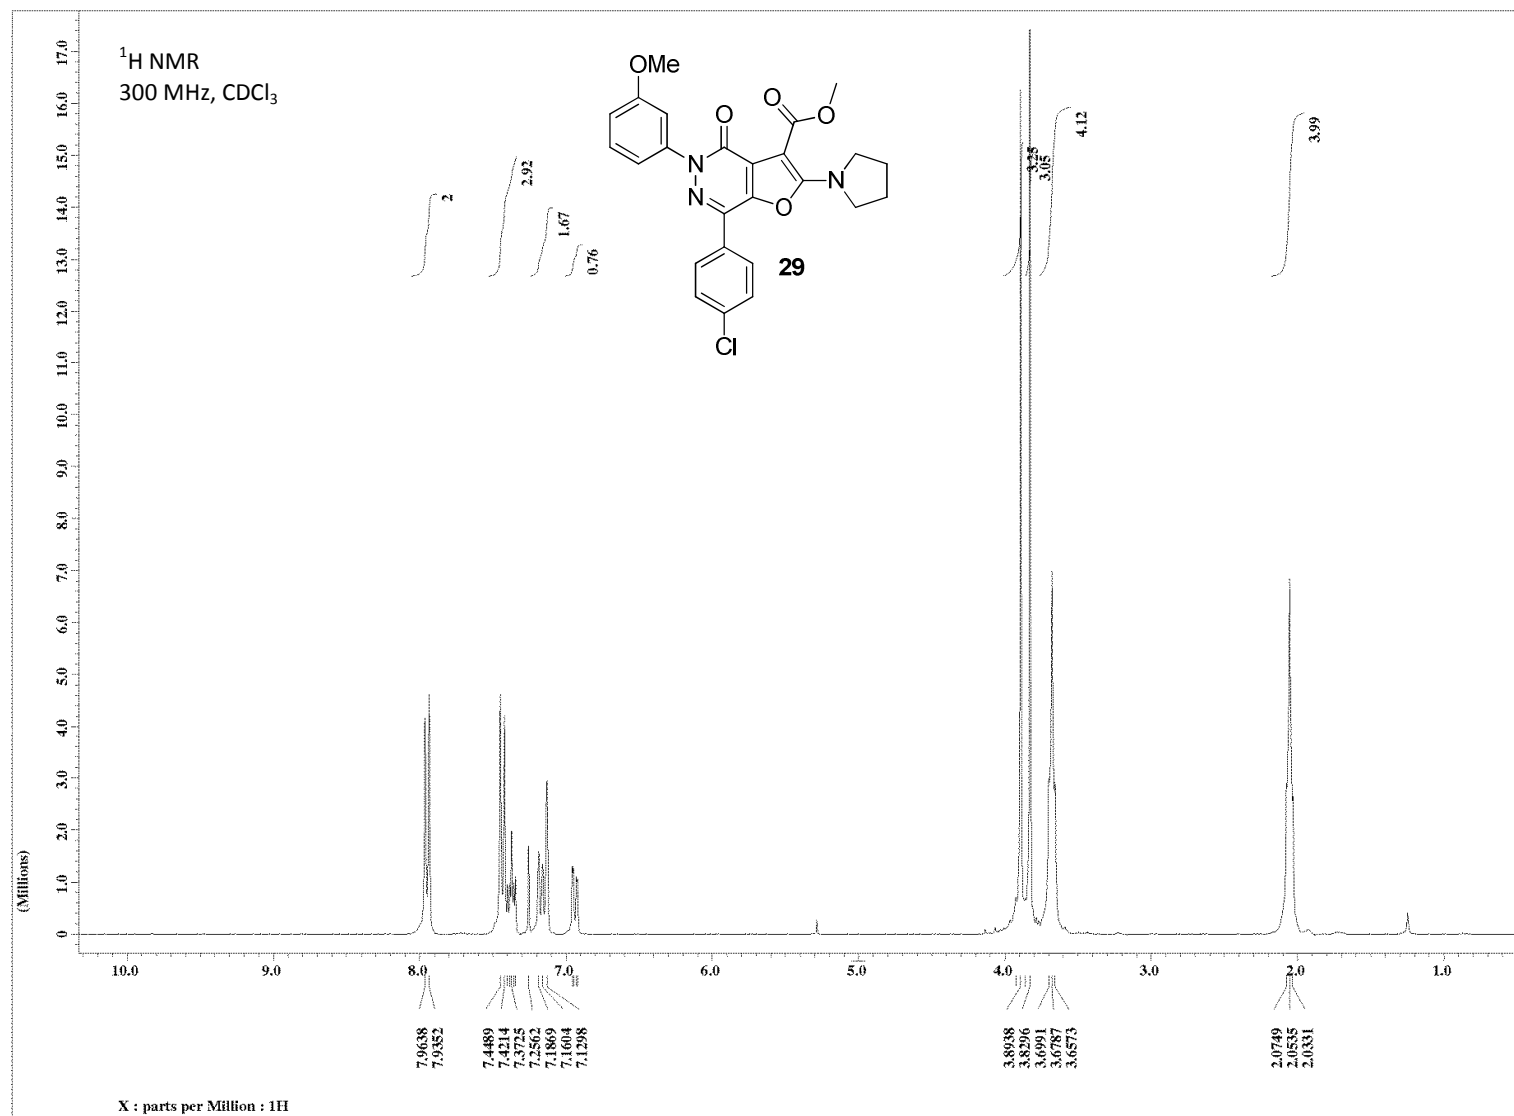

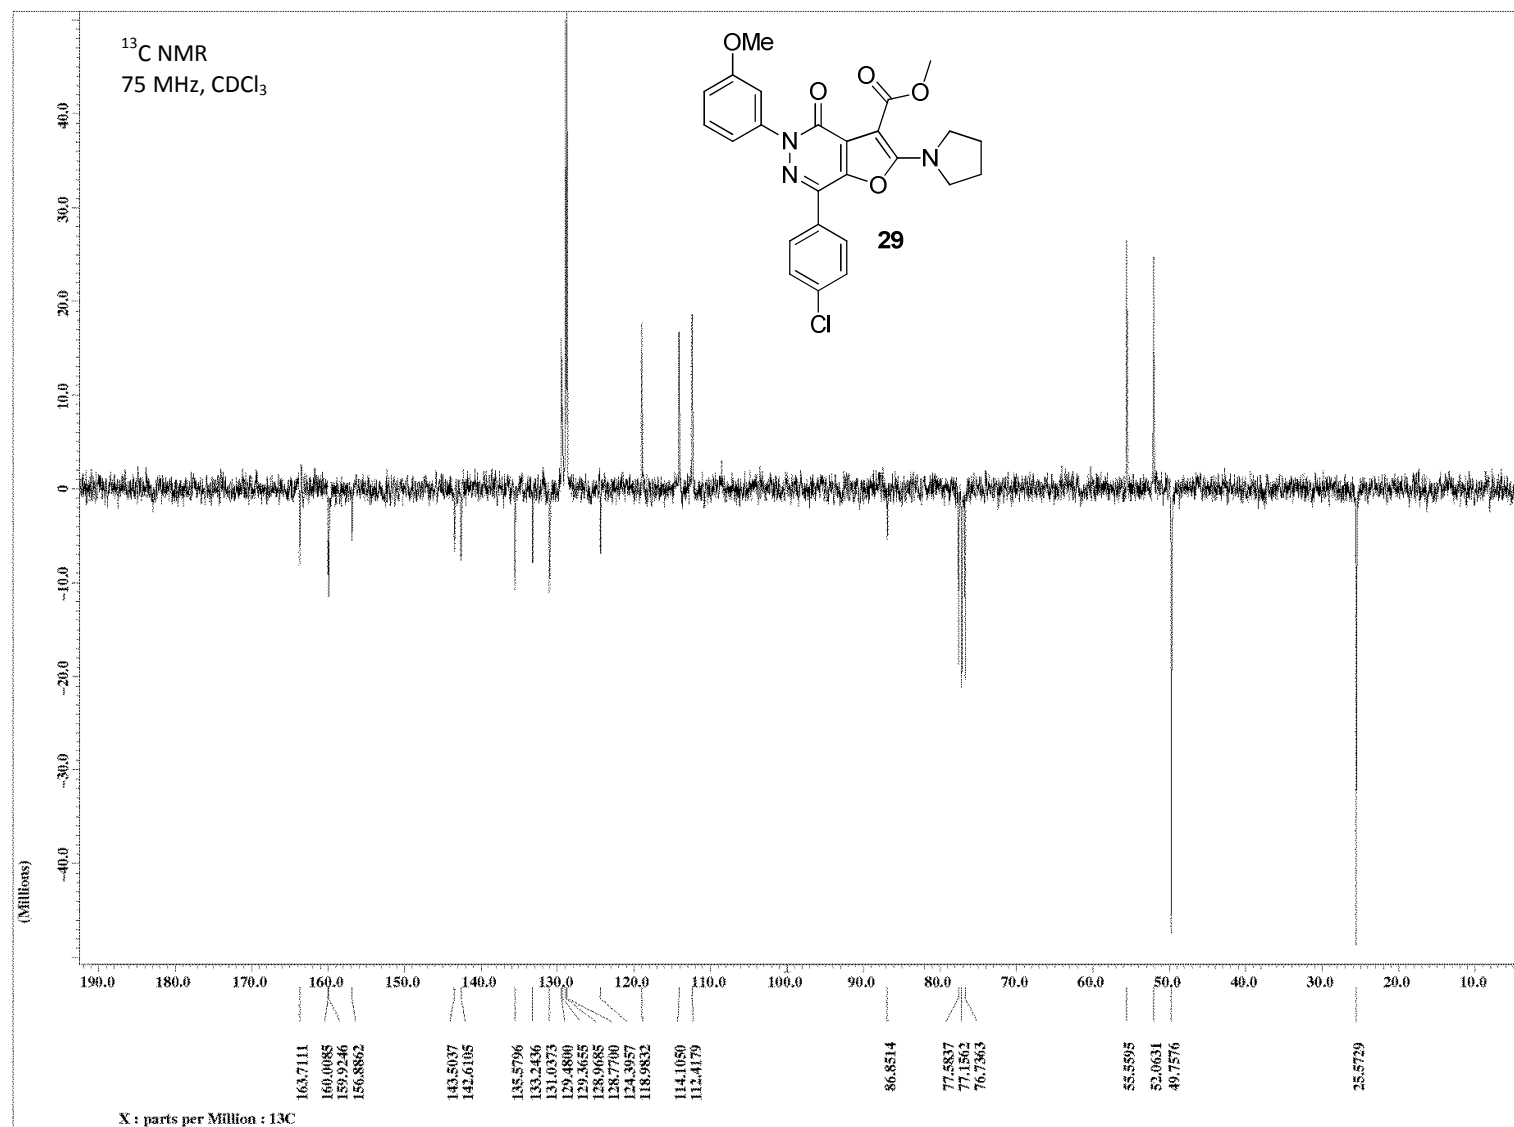

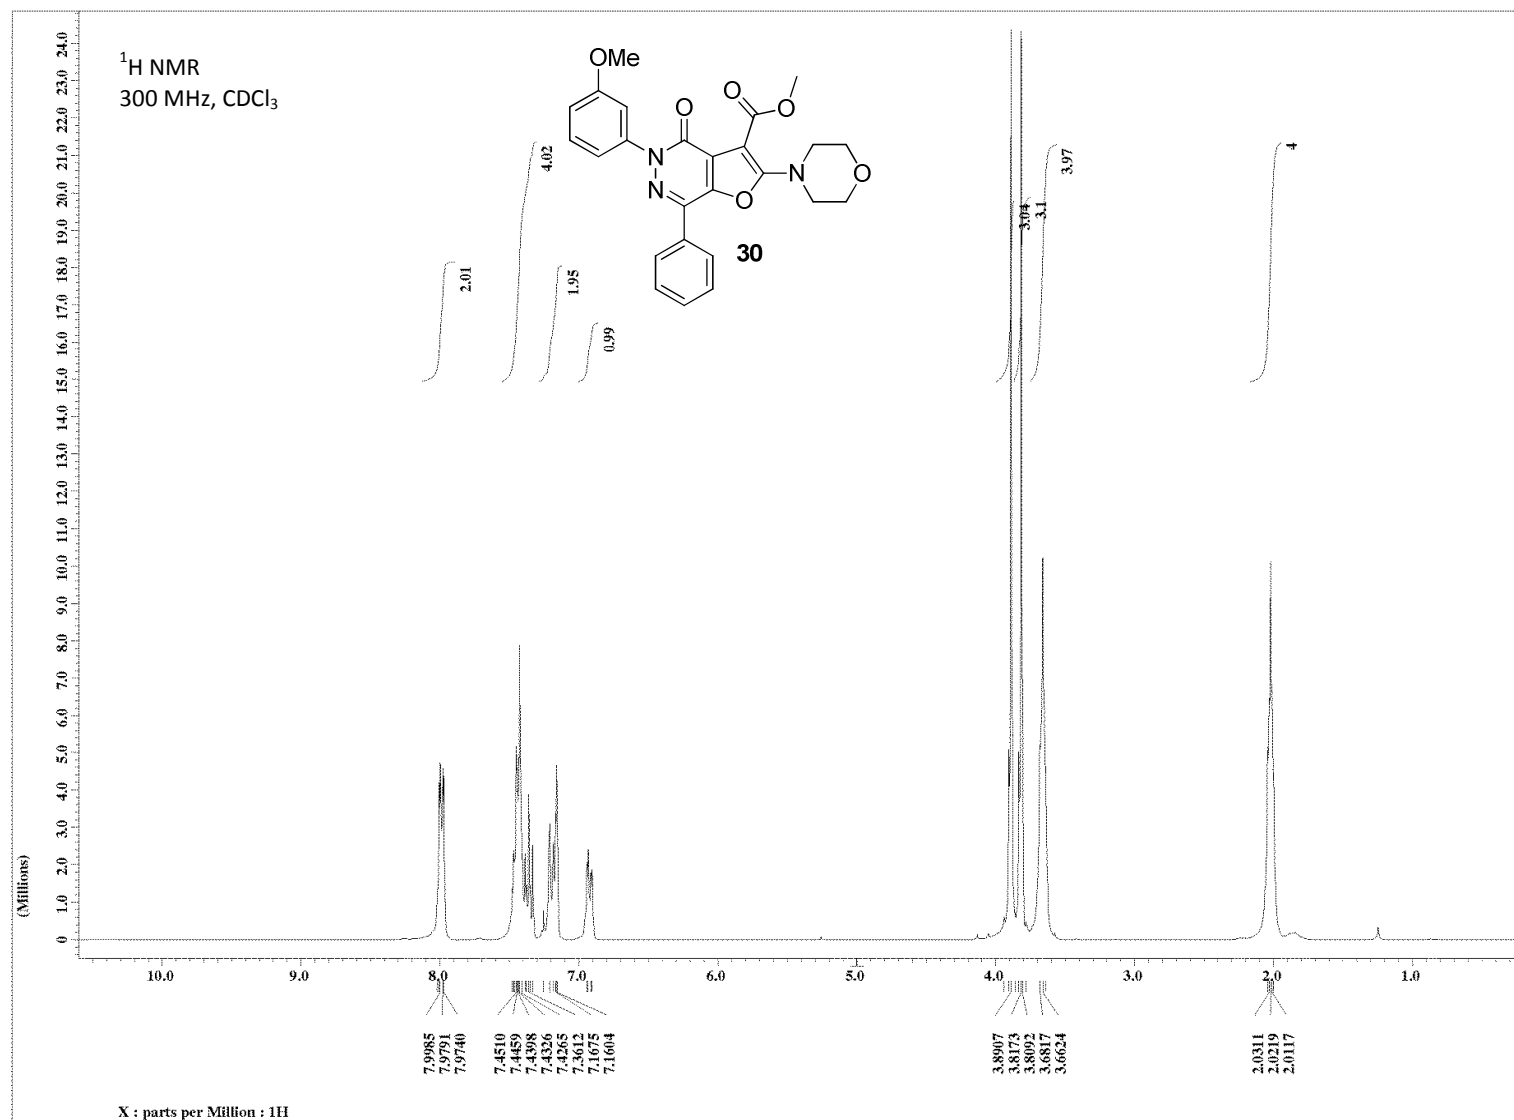

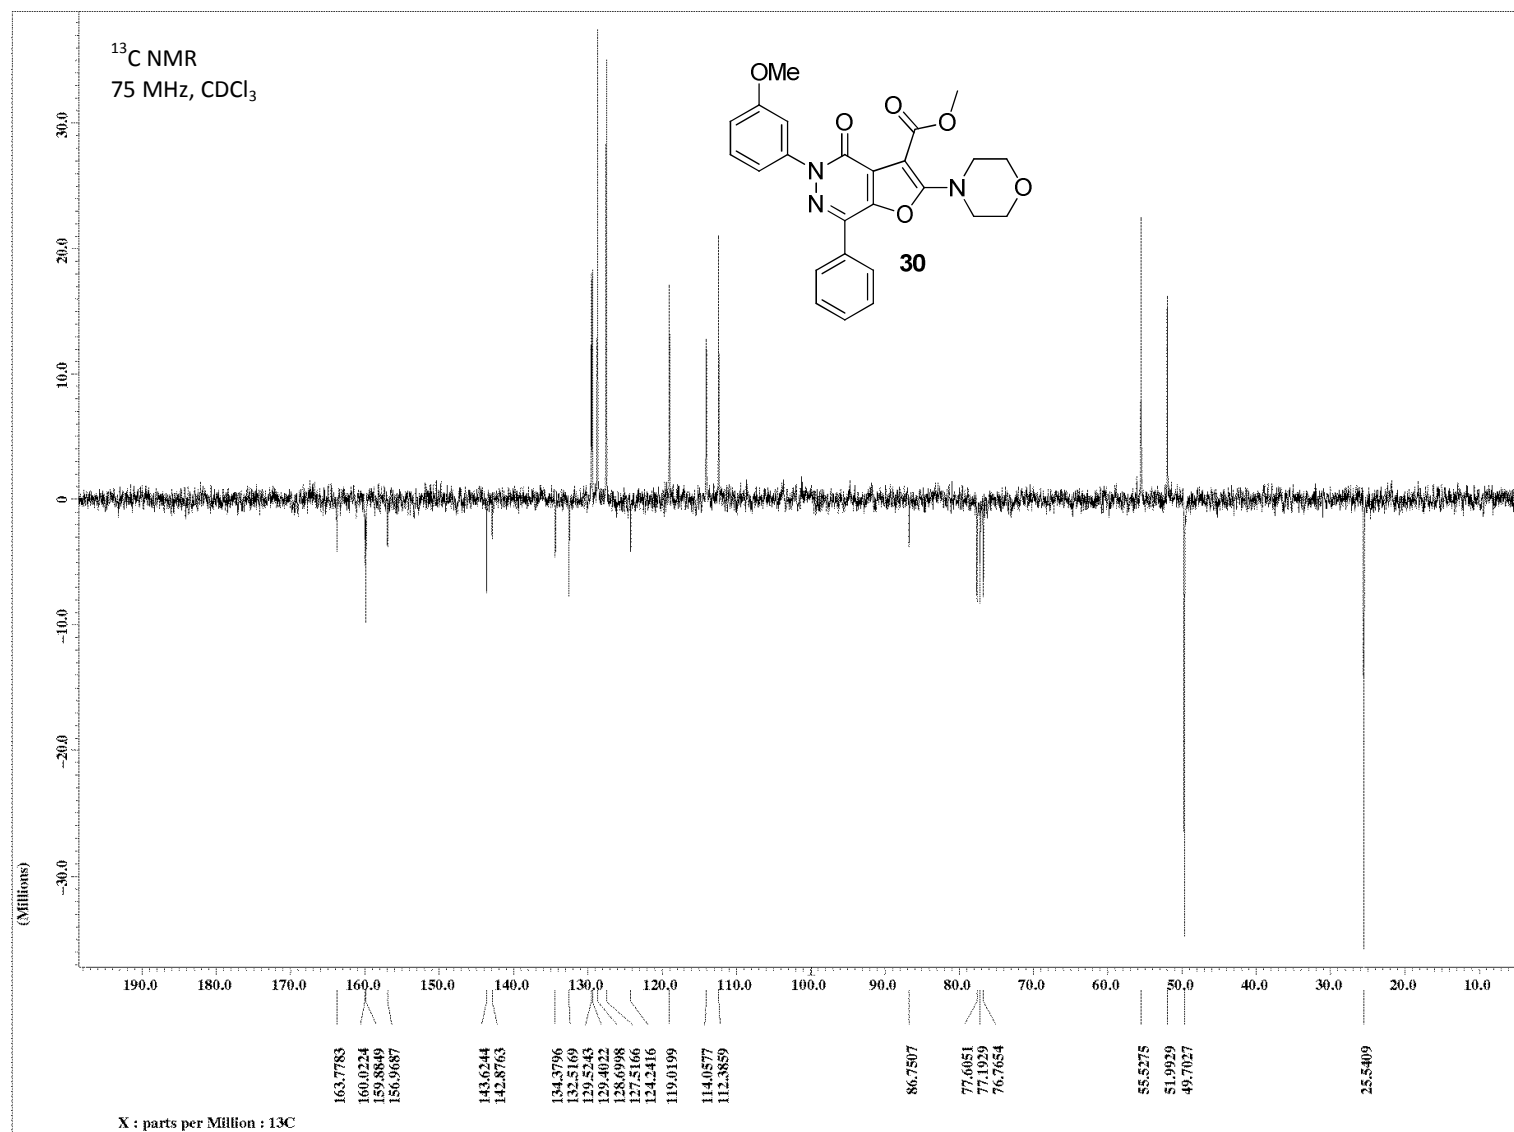

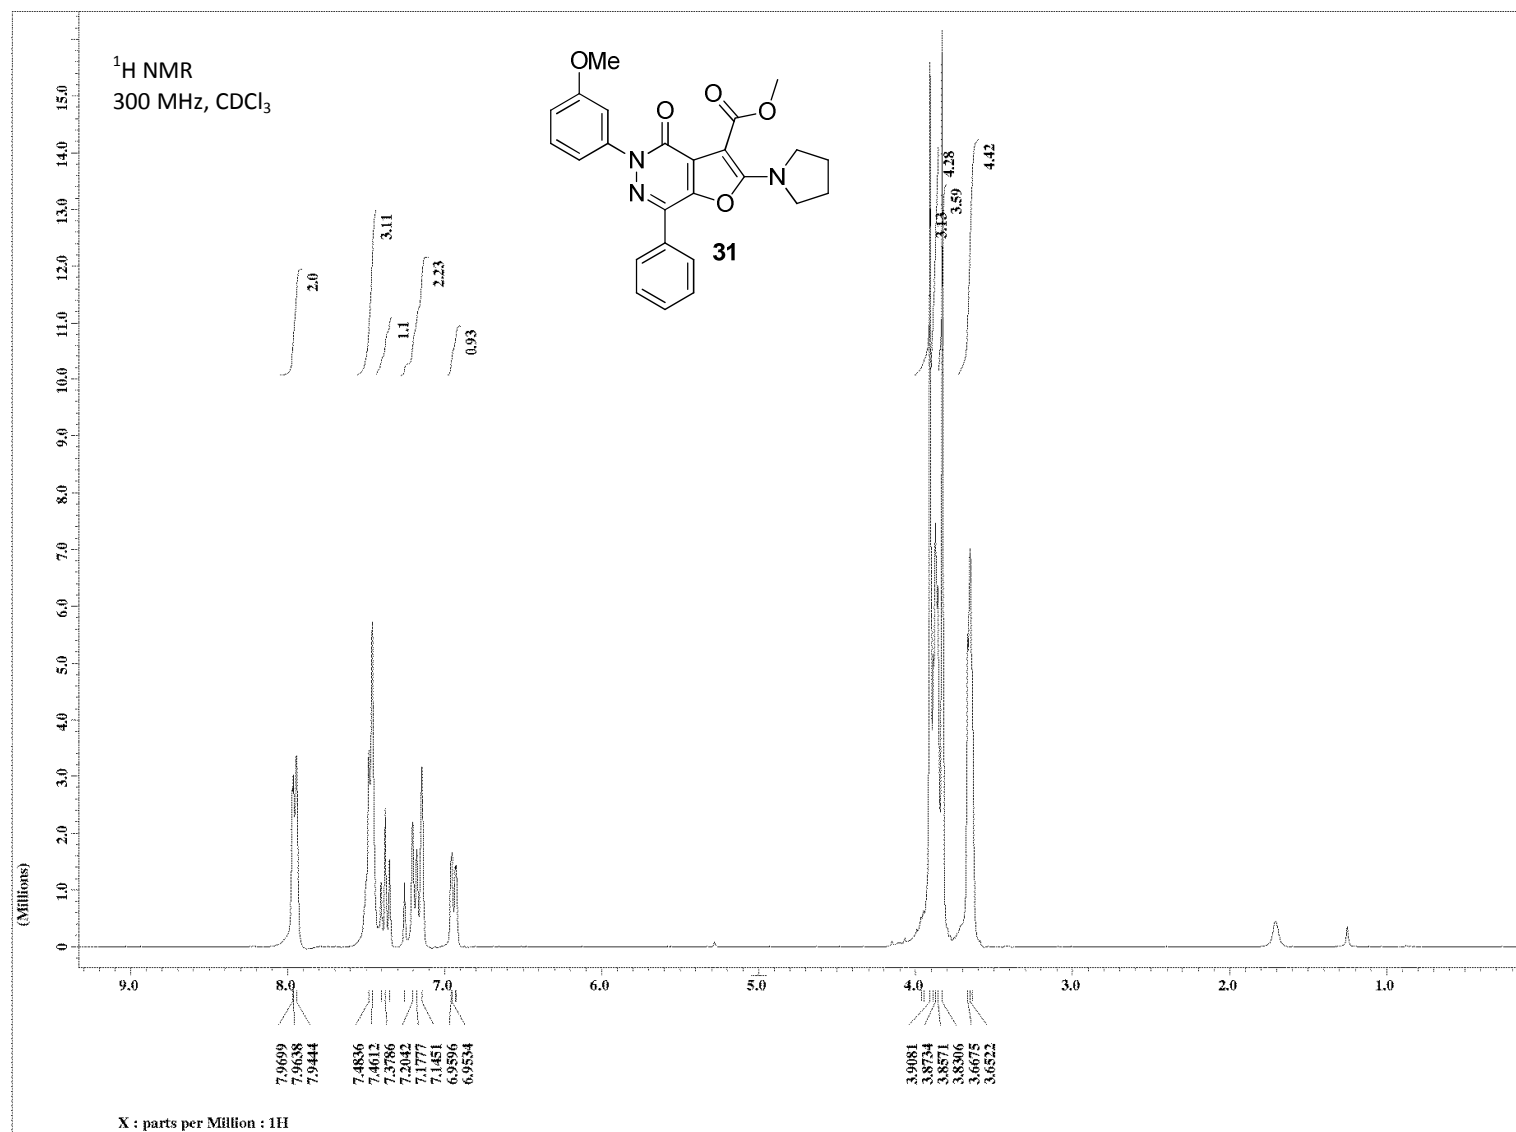



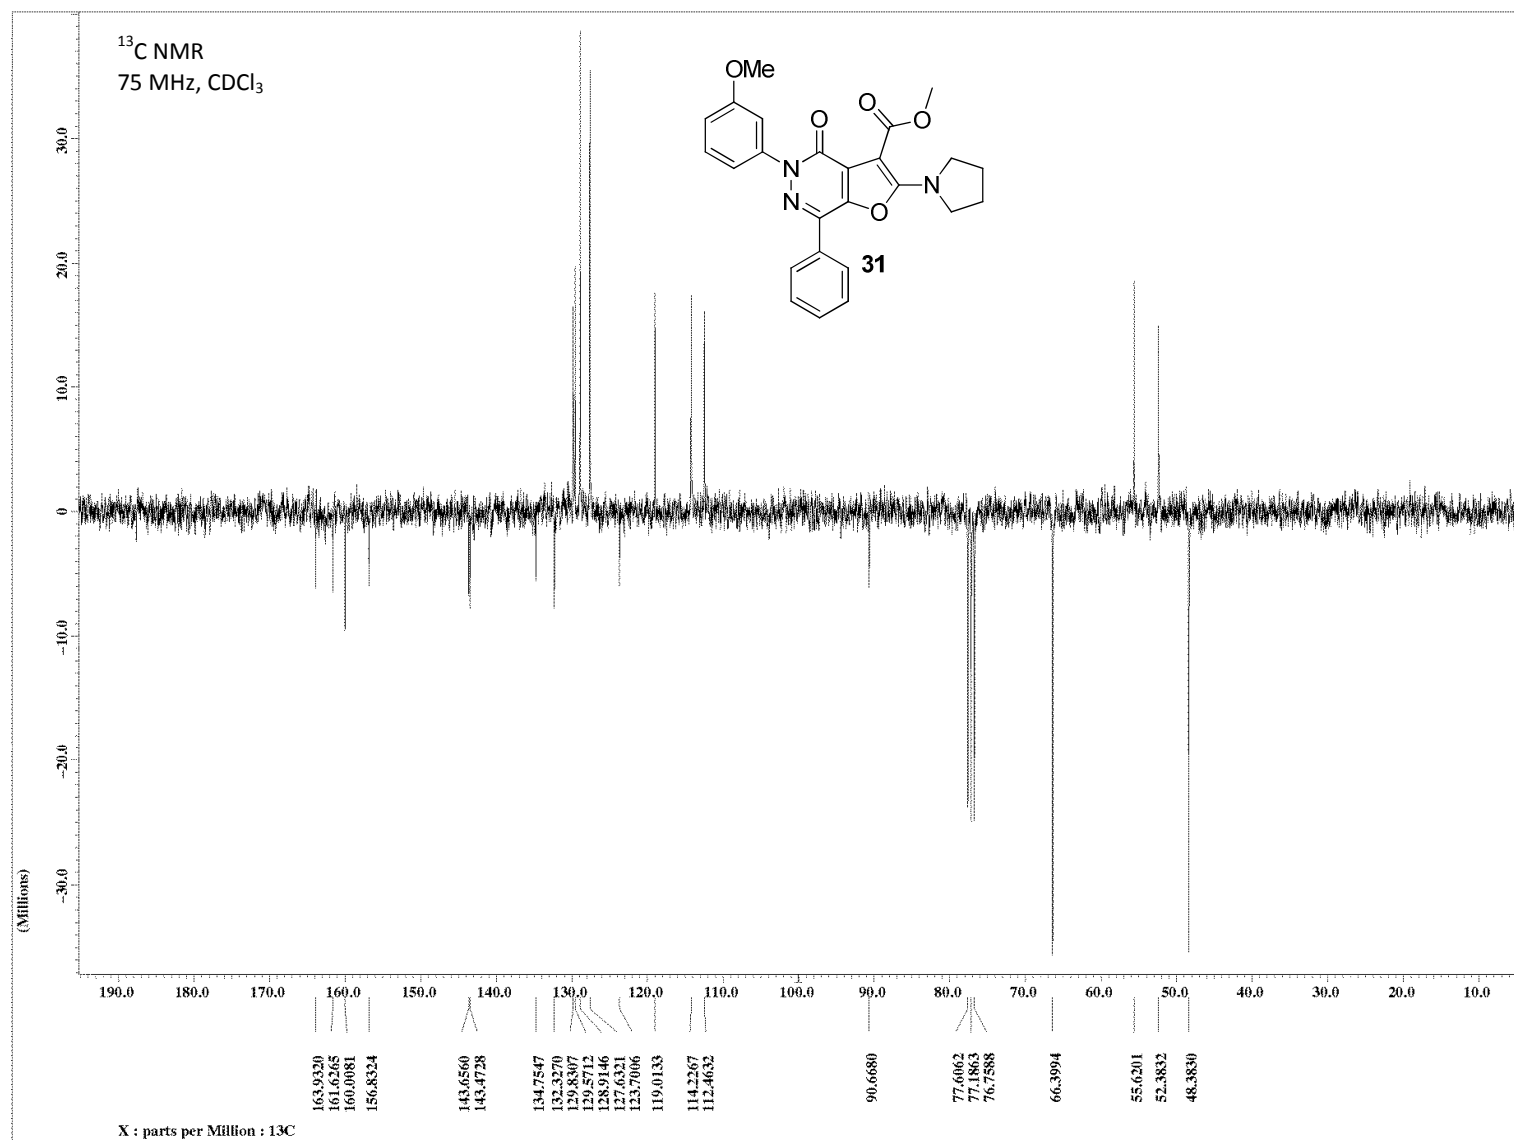

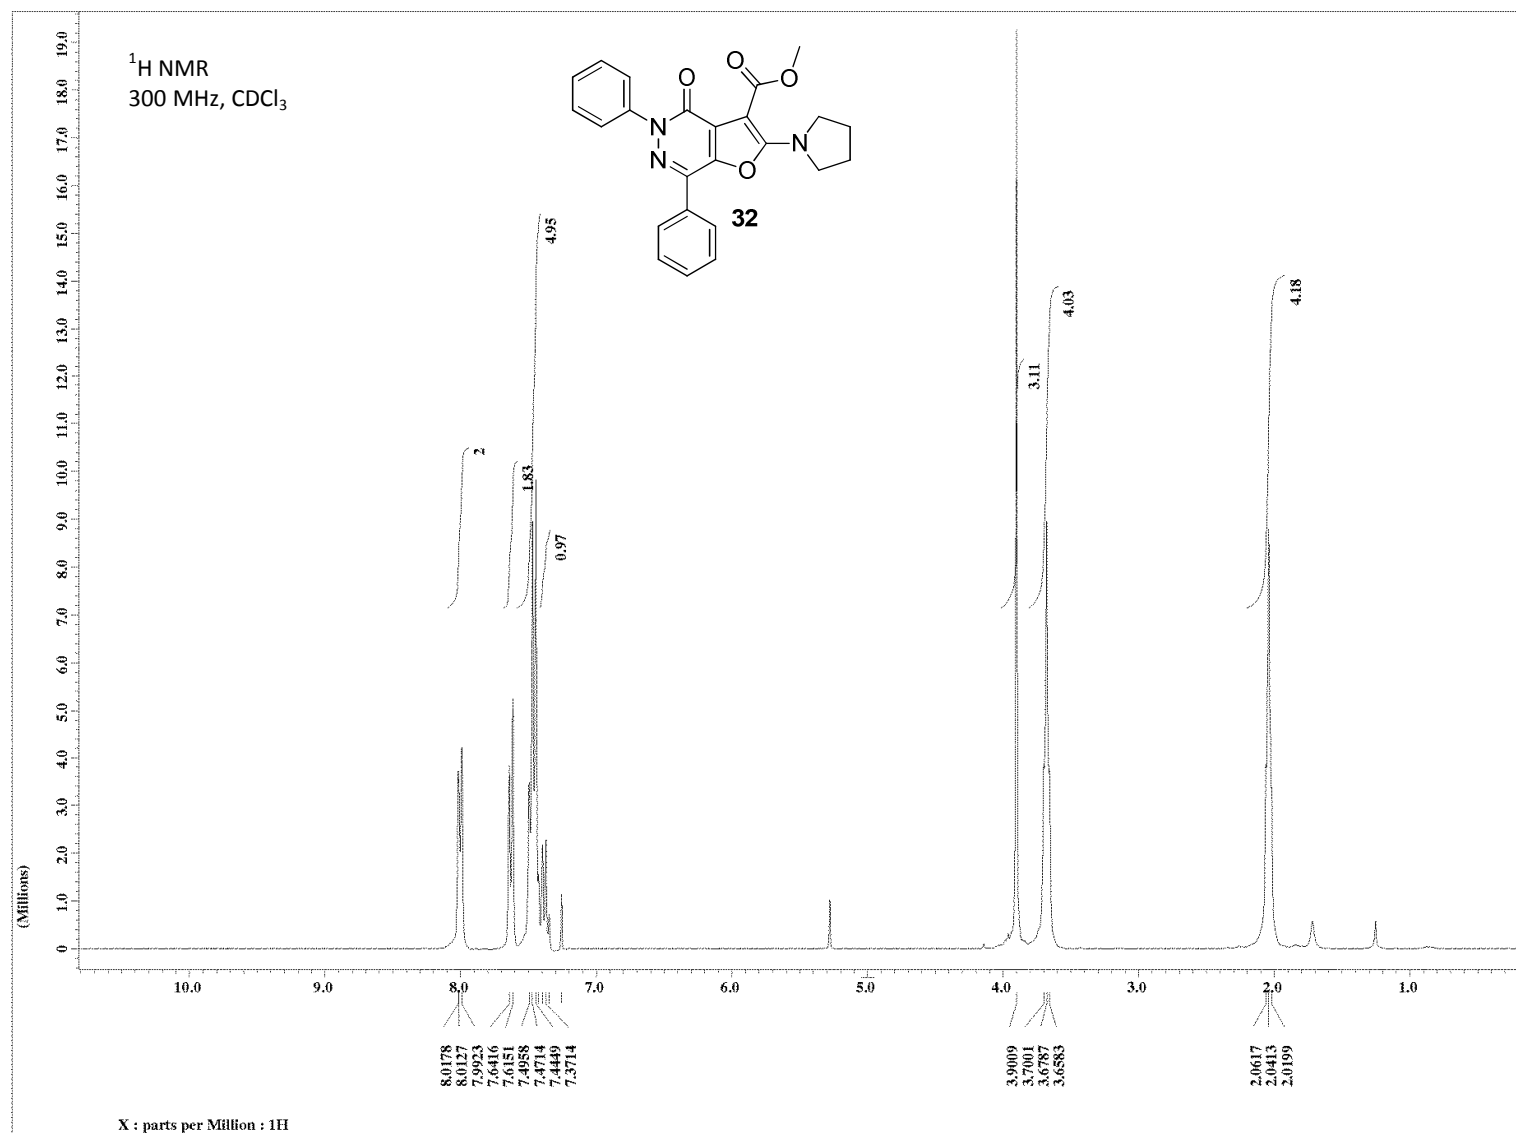

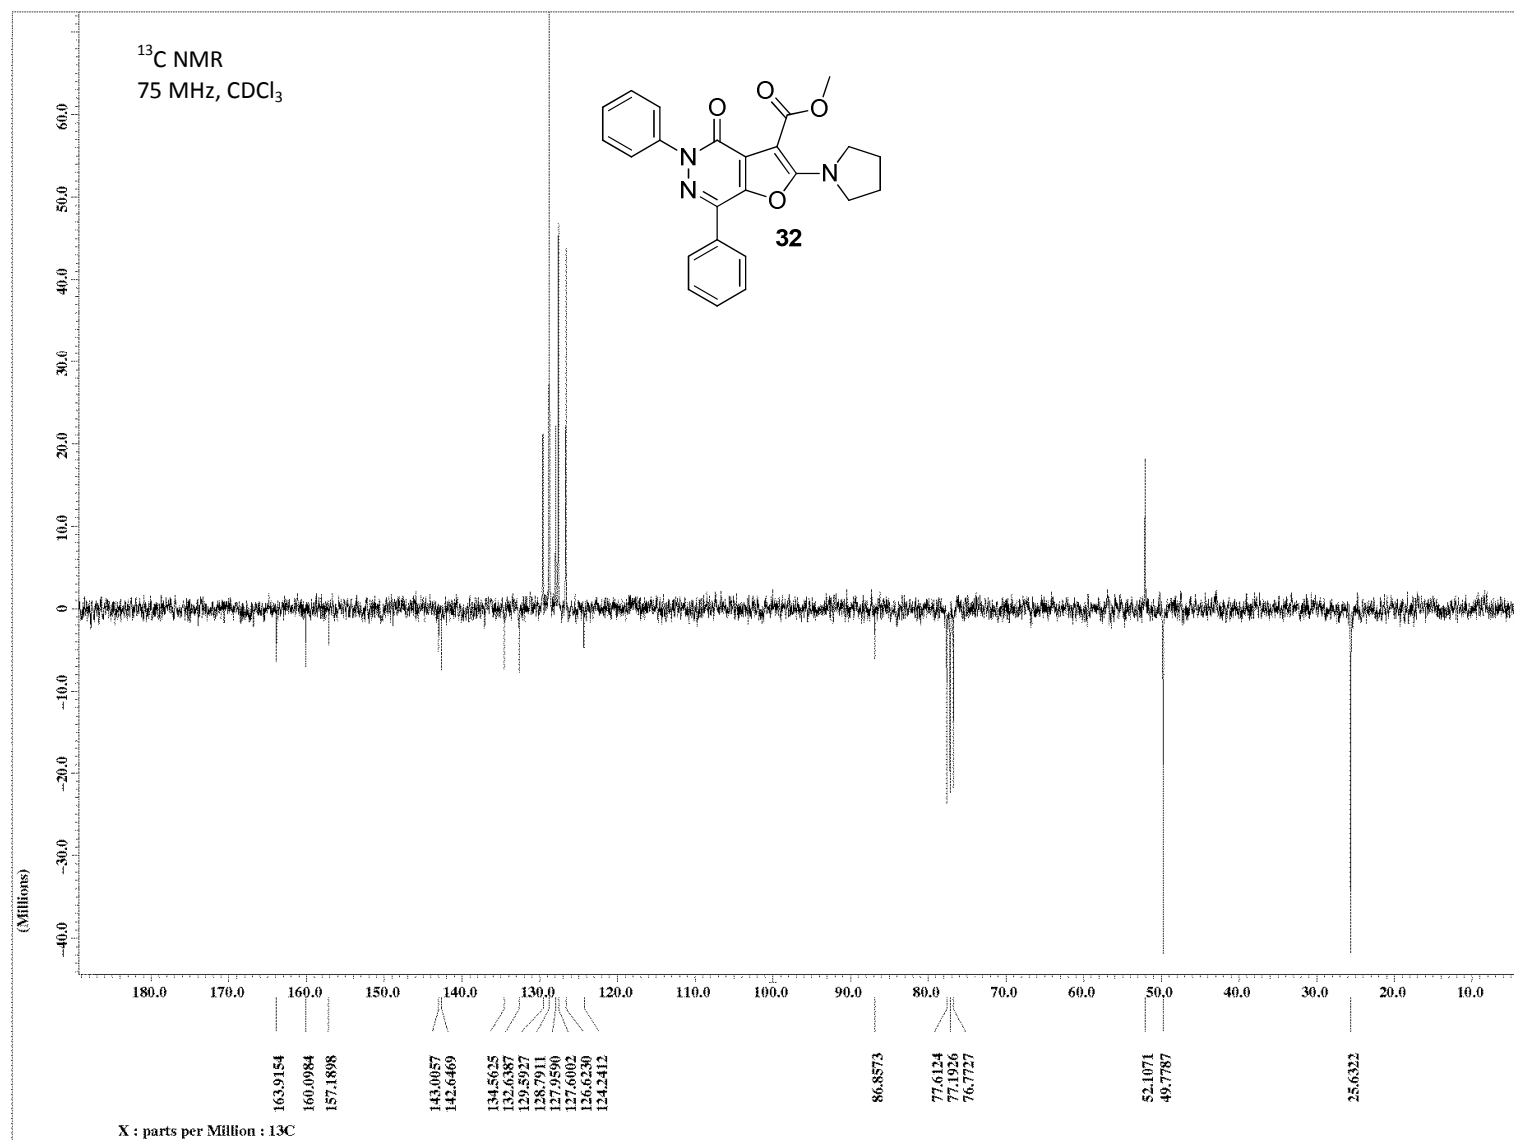

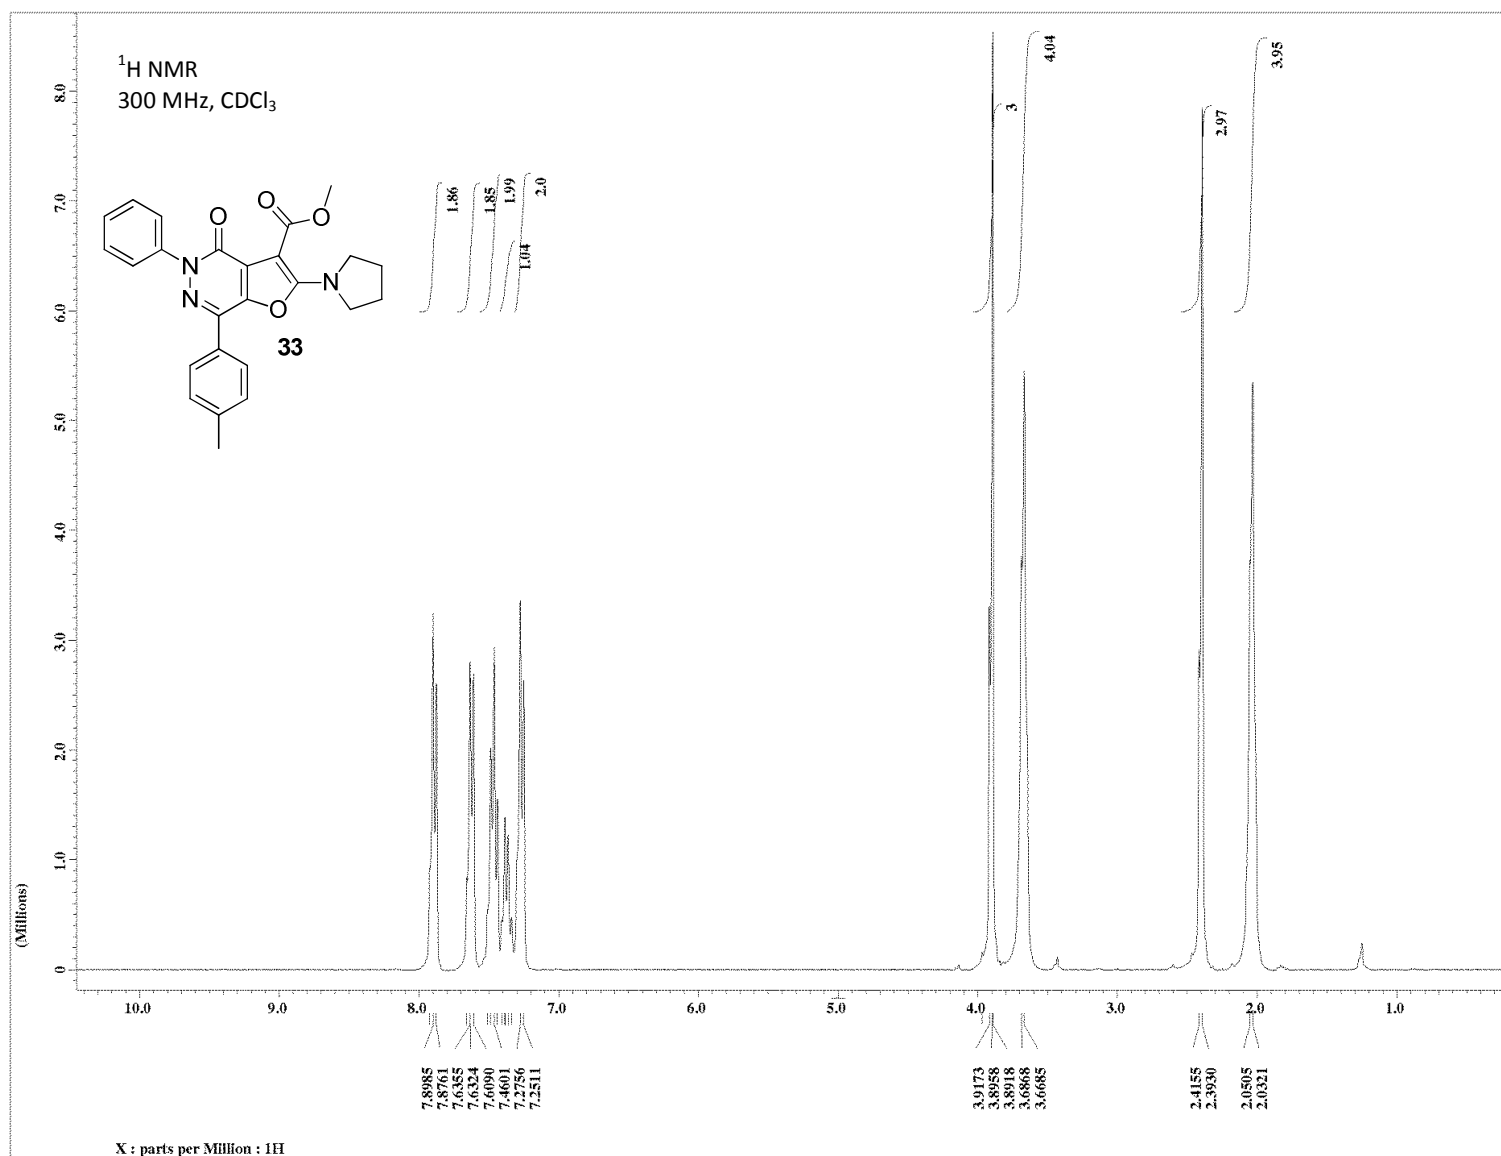

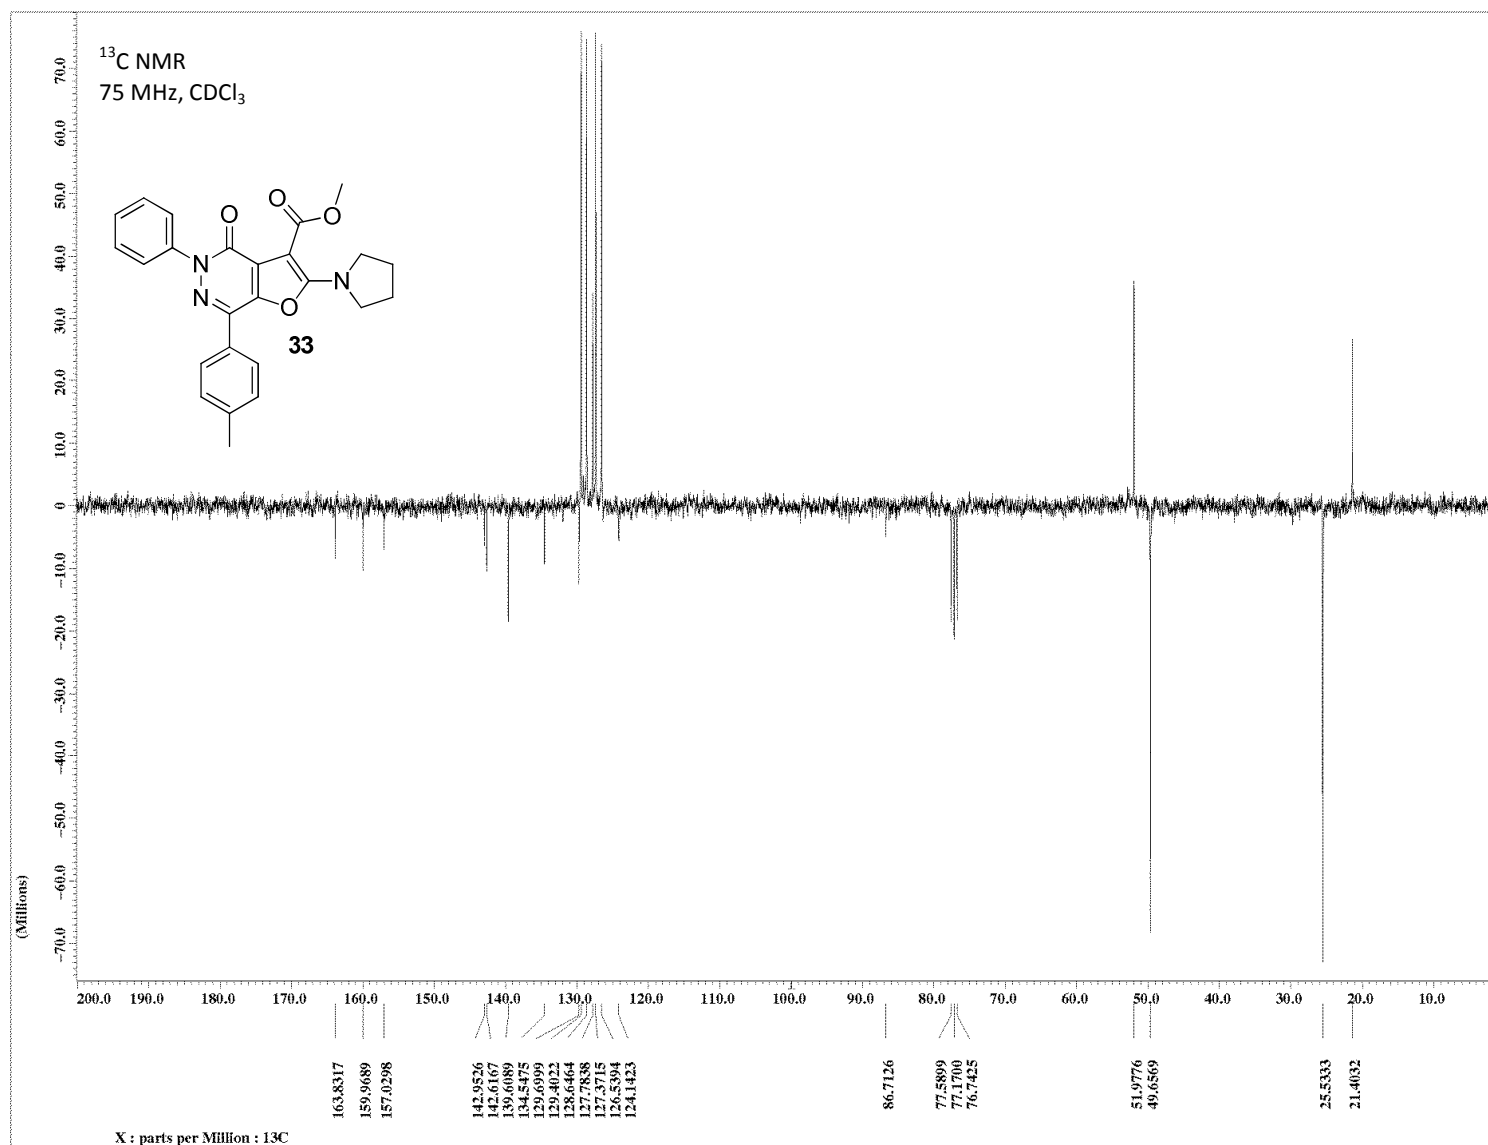

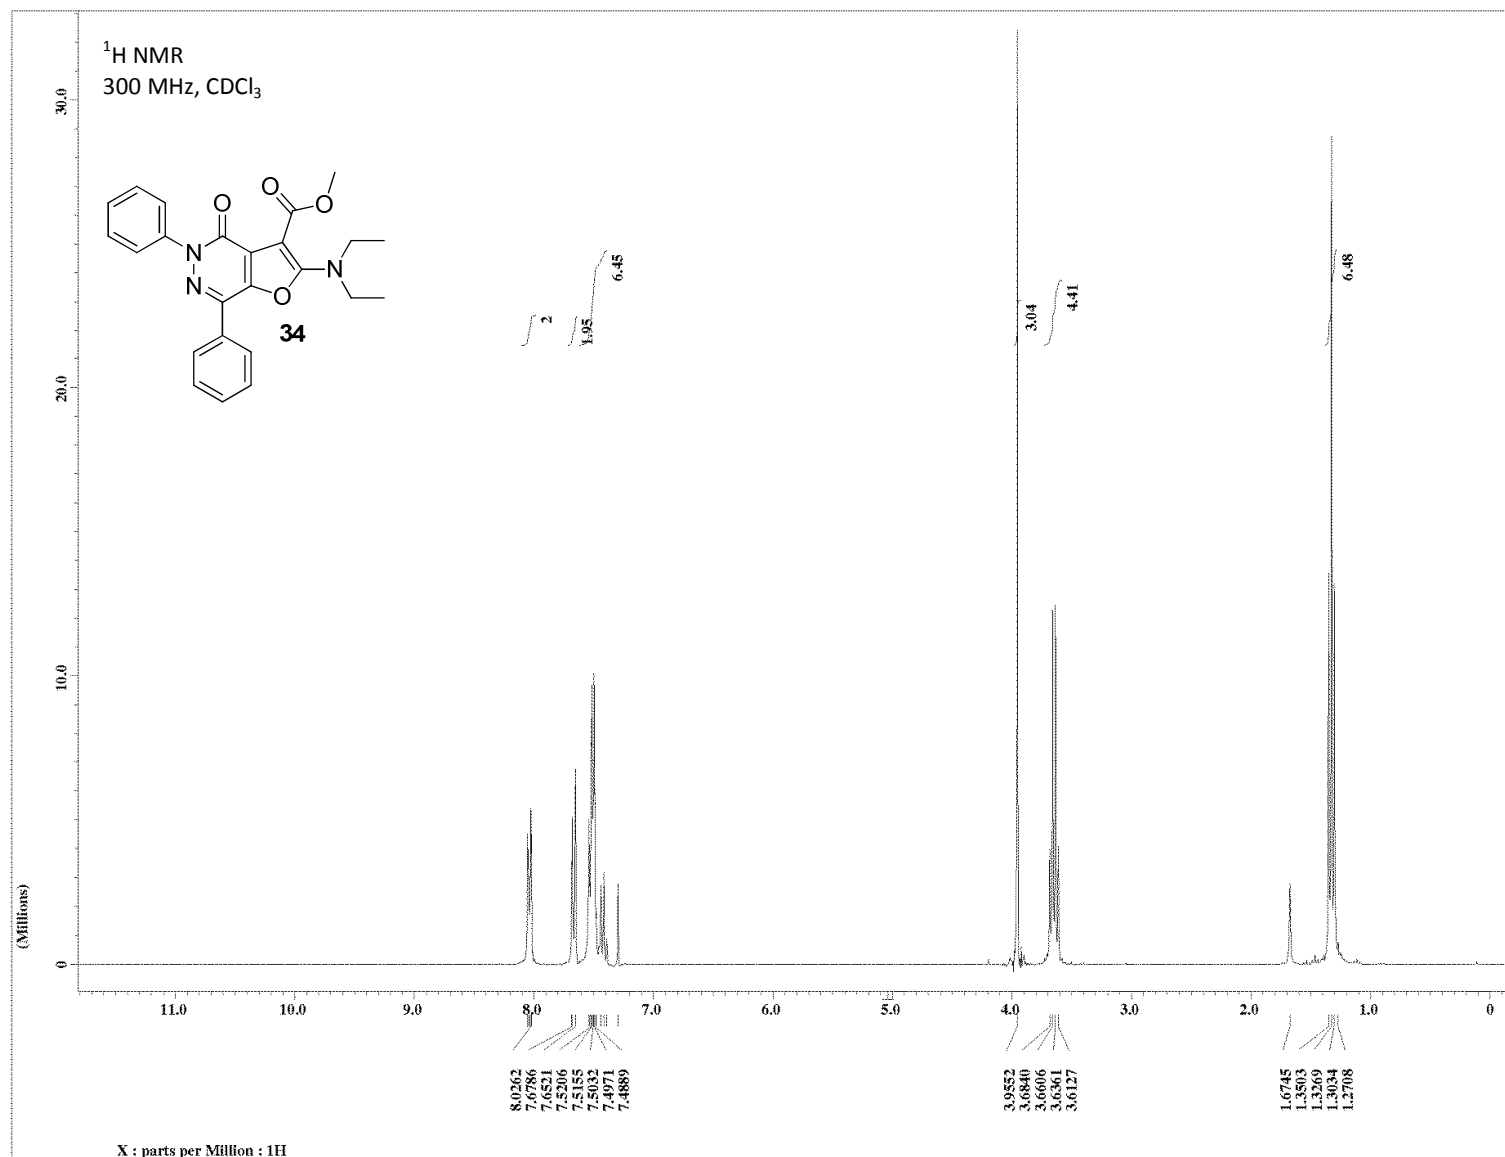

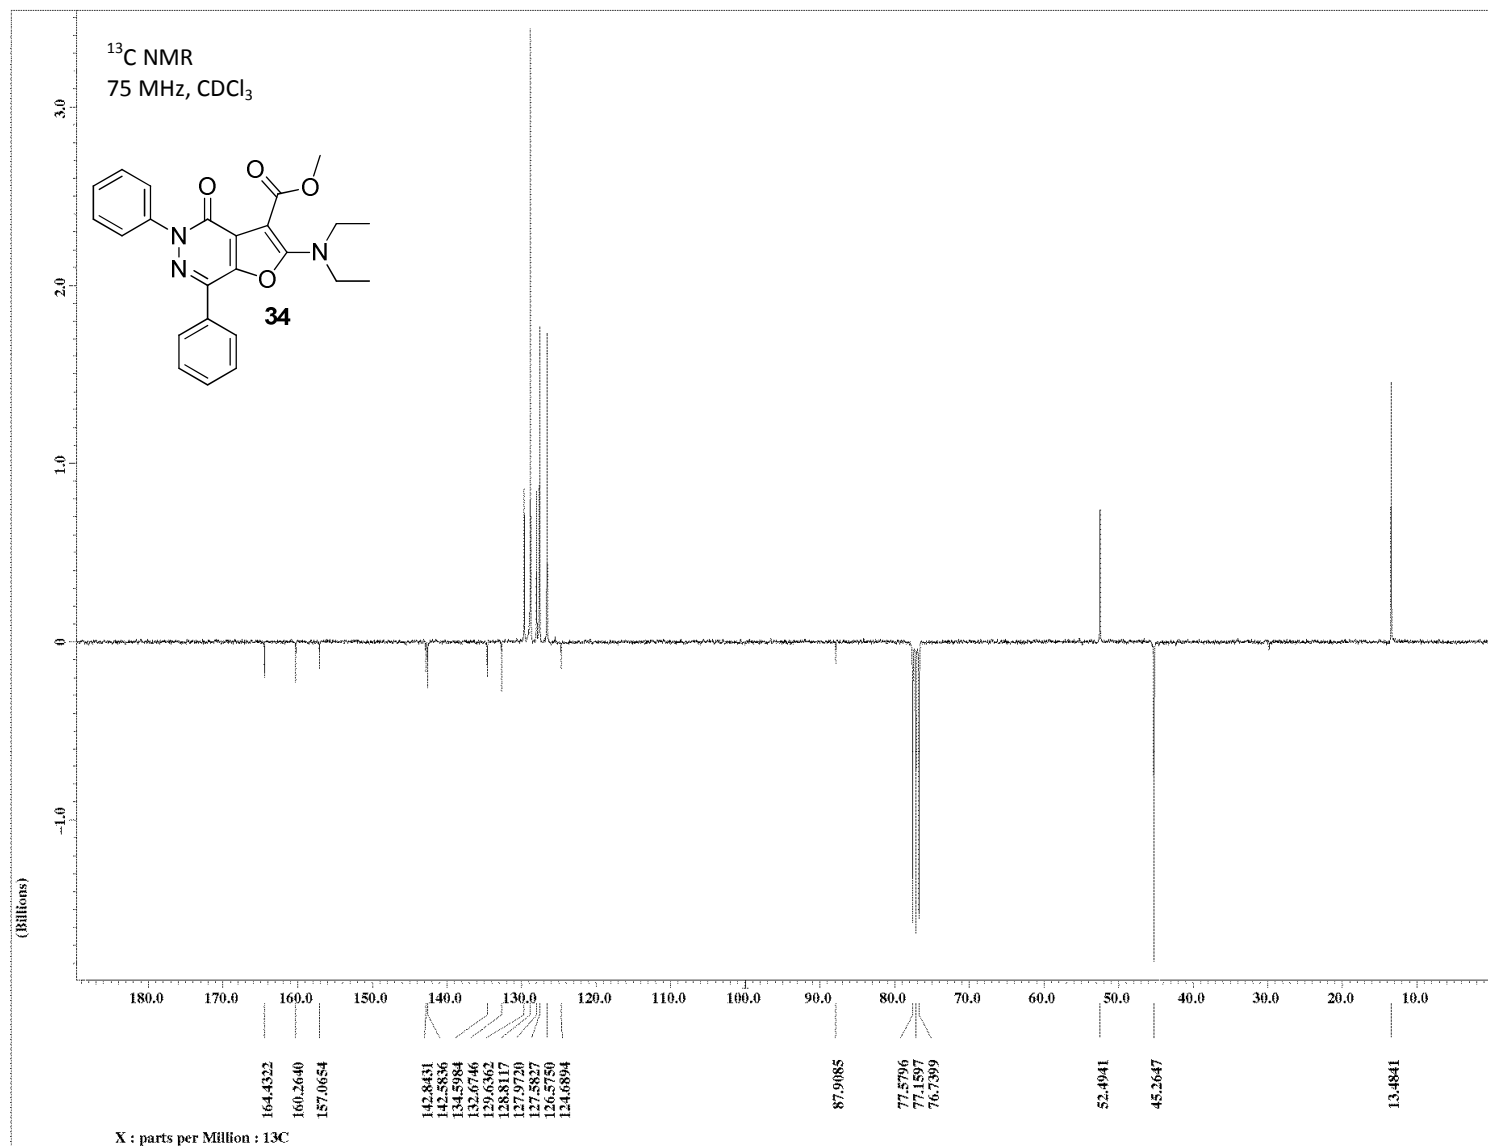

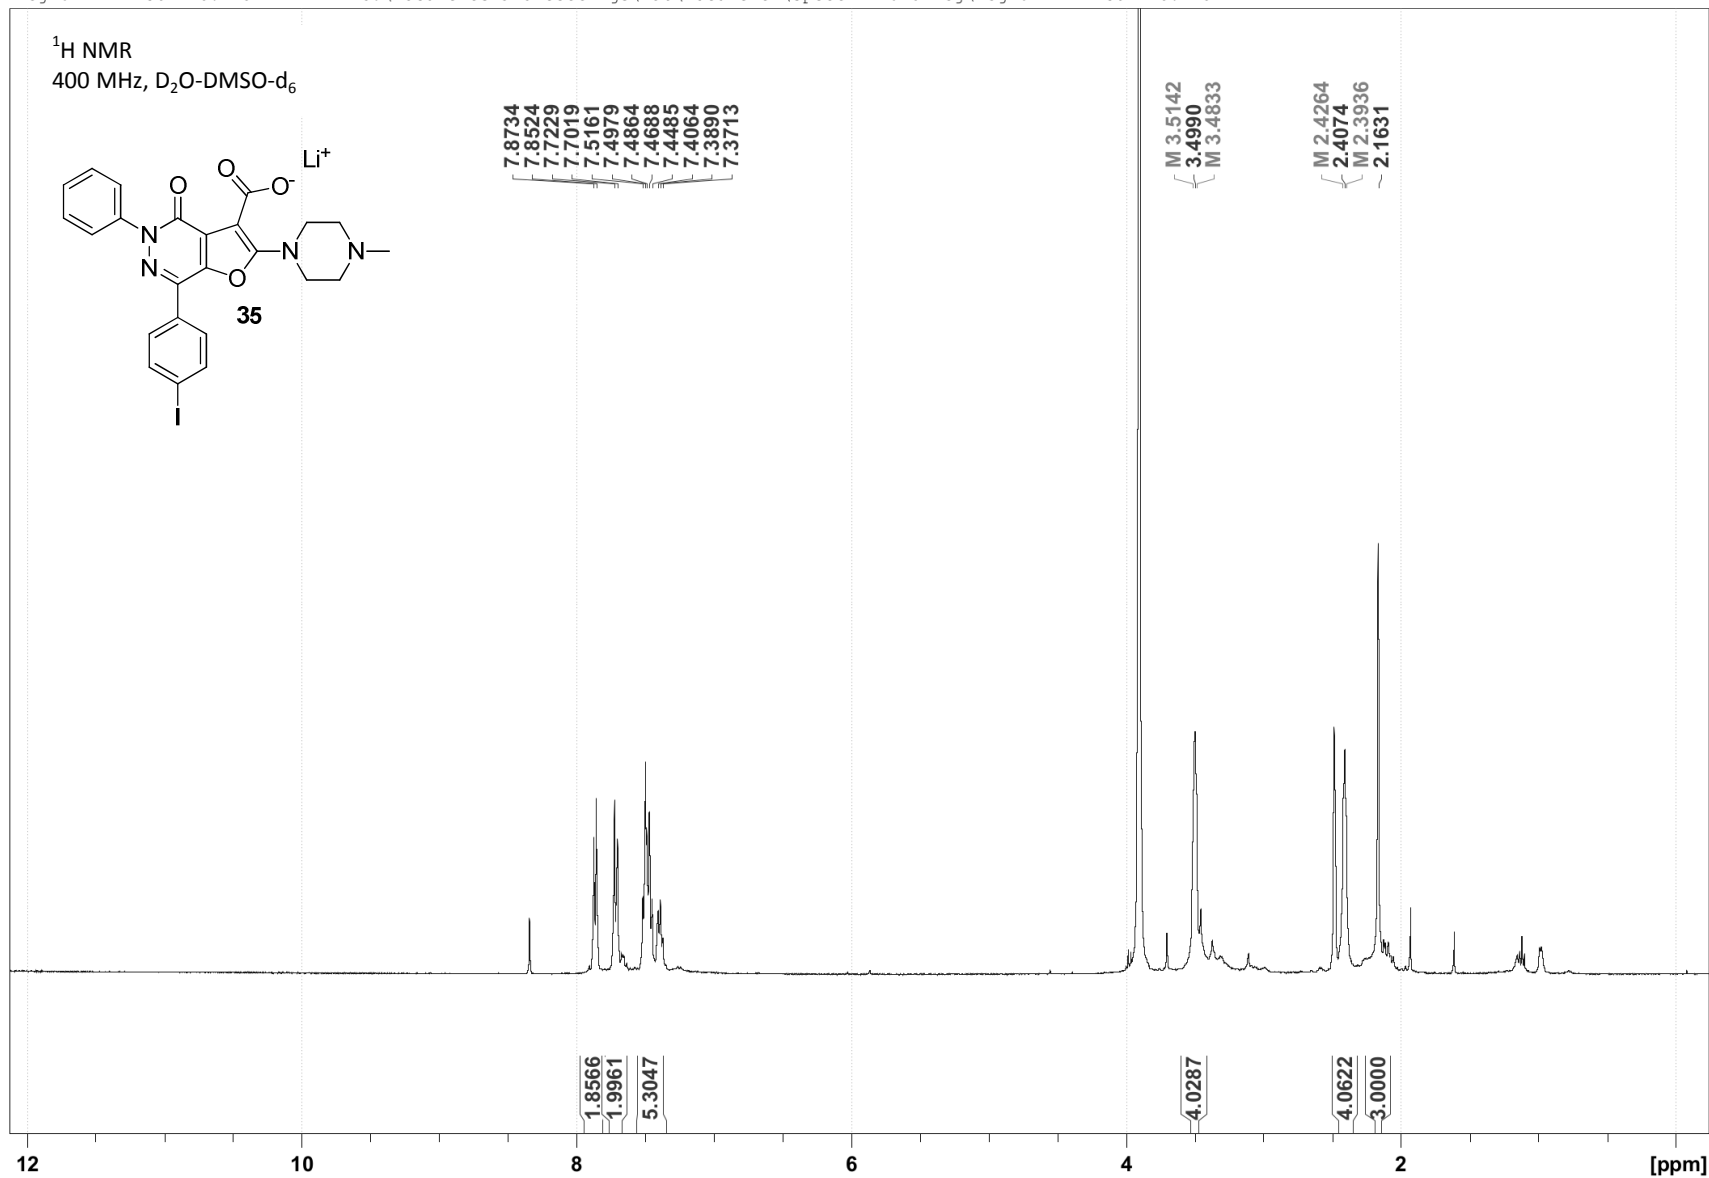



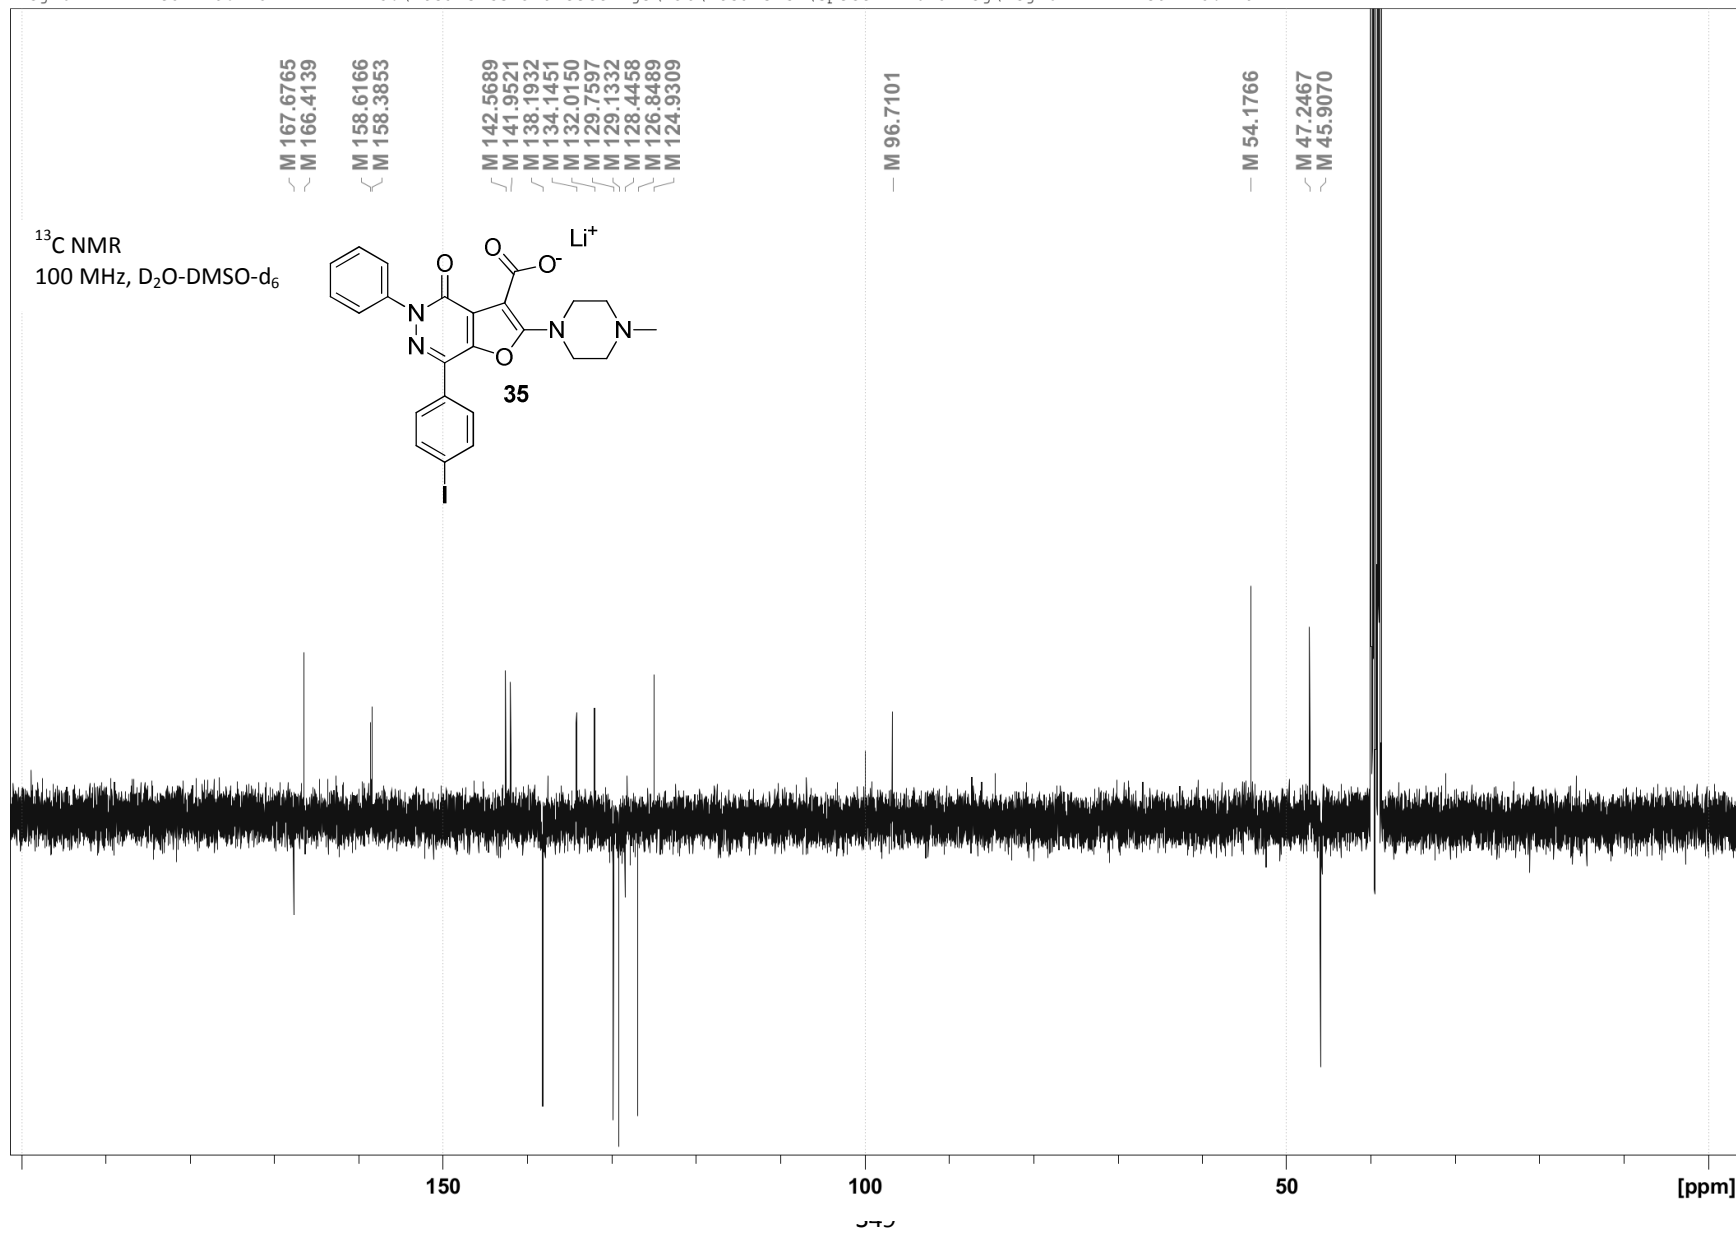

Supplement: Supplementary file 1 [file 3772867]
